# Supplementary material
Source: publisher figshare collection journal article supplement (https://tandf.figshare.com/articles/dataset/_/6063026)
Supplement: Supplementary file 1 [file 2]

# Supplementary Materials 2 to “Linear hypothesis testing with functional data”

Łukasz Smaga <sup>\*1</sup> and Jin-Ting Zhang<sup>2</sup>

<sup>1</sup>Faculty of Mathematics and Computer Science, Adam Mickiewicz University  
Umultowska 87, 61-614 Poznań, Poland, ls@amu.edu.pl

<sup>2</sup>Department of Statistics and Applied Probability, National University of Singapore  
3 Science Drive 2, Lower Kent Ridge Road, Singapore, stazjt@nus.edu.sg

Journal: Technometrics

## Simulation results

Figures 1–16 and Tables 1–44 depict the results of simulations described and discussed in Sections 2 and 3 of the paper. The list of them is given below. The simulation results for testing (separate) hypotheses specified by the coefficient matrices  $\mathbf{C}_i, i = 1, \dots, 6$  look quite similar. Thus some of them are omitted. However, they are available from the authors.

## List of Figures

|   |                                                                                                                                                                              |    |
|---|------------------------------------------------------------------------------------------------------------------------------------------------------------------------------|----|
| 1 | Empirical sizes of the tests obtained for $\mathbf{C}_1$ under Model 1 . . . . .                                                                                             | 5  |
| 2 | Empirical sizes of the tests obtained for $\mathbf{C}_1, \mathbf{C}_7$ under Model 2 . . . . .                                                                               | 6  |
| 3 | Empirical powers of the tests obtained for $\mathbf{C}_2$ under Model 1 and standard normal distribution . . . . .                                                           | 7  |
| 4 | Empirical powers of the tests obtained for $\mathbf{C}_7$ under Model 1 and standard normal distribution . . . . .                                                           | 8  |
| 5 | Empirical powers of the tests obtained for $\mathbf{C}_3, \mathbf{C}_7$ under Model 2 . . . . .                                                                              | 9  |
| 6 | Empirical sizes and powers of the tests obtained for $\mathbf{C}_7$ under Model 1 and standard normal distribution, when the number of observations is larger .              | 10 |
| 7 | Experimentwise error rates of the tests obtained under Model 1 when all group mean functions are equal, i.e., $\delta = 0$ . . . . .                                         | 11 |
| 8 | Experimentwise error rates of the tests obtained under Model 1 and standard normal distribution when the group mean functions are not equal, i.e., $\delta \neq 0$ . . . . . | 12 |

---

<sup>\*</sup>Corresponding author (ls@amu.edu.pl)

|    |                                                                                                                                                                              |    |
|----|------------------------------------------------------------------------------------------------------------------------------------------------------------------------------|----|
| 9  | Comparisonwise error rates of the tests obtained under Model 1 when all group mean functions are equal, i.e., $\delta = 0$ . . . . .                                         | 13 |
| 10 | Comparisonwise error rates of the tests obtained under Model 1 and standard normal distribution when the group mean functions are not equal, i.e., $\delta \neq 0$ . . . . . | 14 |
| 11 | Experimentwise power rates of the tests obtained under Model 1 and standard normal distribution . . . . .                                                                    | 15 |
| 12 | Comparisonwise power rates of the tests obtained under Model 1 and standard normal distribution . . . . .                                                                    | 16 |
| 13 | The ACD power rates of the tests obtained under Model 1 and standard normal distribution . . . . .                                                                           | 17 |
| 14 | Experimentwise and comparisonwise error rates of the tests obtained under Model 2 and equal group mean functions . . . . .                                                   | 18 |
| 15 | Experimentwise and comparisonwise error rates of the tests obtained under Model 2 and unequal group mean functions . . . . .                                                 | 19 |
| 16 | Experimentwise, comparisonwise and ACD power rates of the tests obtained under Model 2 . . . . .                                                                             | 20 |

## List of tables

|    |                                                                                                                                                                                                                                             |    |
|----|---------------------------------------------------------------------------------------------------------------------------------------------------------------------------------------------------------------------------------------------|----|
| 1  | Empirical sizes and powers of the GPF test obtained for $\mathbf{C}_7$ under Model 3, when asymptotic null distribution of test statistic is approximated by Welch-Satterthwaite and by Imhof’s methods . . . . .                           | 21 |
| 2  | Empirical sizes and powers of the GPF and Fmax tests obtained for $\mathbf{C}_7$ under Model 3, when asymptotic null distributions of test statistics are approximated by Welch-Satterthwaite and by parametric bootstrap methods . . . . . | 22 |
| 3  | Empirical sizes of the tests obtained for $\mathbf{C}_1$ under Model 1 . . . . .                                                                                                                                                            | 23 |
| 4  | Empirical sizes of the tests obtained for $\mathbf{C}_7$ under Model 1 . . . . .                                                                                                                                                            | 24 |
| 5  | Empirical sizes of the tests obtained for $\mathbf{C}_1, \mathbf{C}_7$ under Model 2 . . . . .                                                                                                                                              | 25 |
| 6  | Empirical powers of the tests obtained for $\mathbf{C}_2$ under Model 1 and standard normal distribution . . . . .                                                                                                                          | 26 |
| 7  | Empirical powers of the tests obtained for $\mathbf{C}_2$ under Model 1 and $t$ -distribution $t_4/\sqrt{2}$ . . . . .                                                                                                                      | 27 |
| 8  | Empirical powers of the tests obtained for $\mathbf{C}_7$ under Model 1 and standard normal distribution . . . . .                                                                                                                          | 28 |
| 9  | Empirical powers of the tests obtained for $\mathbf{C}_7$ under Model 1 and $t$ -distribution $t_4/\sqrt{2}$ . . . . .                                                                                                                      | 29 |
| 10 | Empirical powers of the tests obtained for $\mathbf{C}_3, \mathbf{C}_7$ under Model 2 . . . . .                                                                                                                                             | 30 |
| 11 | Empirical sizes and powers of the tests obtained for $\mathbf{C}_2$ under Model 3 and standard normal distribution . . . . .                                                                                                                | 31 |
| 12 | Empirical sizes and powers of the tests obtained for $\mathbf{C}_2$ under Model 4 and standard normal distribution . . . . .                                                                                                                | 32 |
| 13 | Empirical sizes and powers of the tests obtained for $\mathbf{C}_2$ under Model 5 and standard normal distribution . . . . .                                                                                                                | 33 |
| 14 | Empirical sizes and powers of the tests obtained for $\mathbf{C}_2$ under Model 6 and standard normal distribution . . . . .                                                                                                                | 34 |

|    |                                                                                                                                                                                  |    |
|----|----------------------------------------------------------------------------------------------------------------------------------------------------------------------------------|----|
| 15 | Experimentwise error rates of the tests obtained under Model 1 when all group mean functions are equal, i.e., $\delta = 0$ . . . . .                                             | 35 |
| 16 | Experimentwise error rates of the tests obtained under Model 1 and standard normal distribution when the group mean functions are not equal, i.e., $\delta \neq 0$ . . . . .     | 36 |
| 17 | Experimentwise error rates of the tests obtained under Model 1 and $t$ -distribution $t_4/\sqrt{2}$ when the group mean functions are not equal, i.e., $\delta \neq 0$ . . . . . | 37 |
| 18 | Comparisonwise error rates of the tests obtained under Model 1 when all group mean functions are equal, i.e., $\delta = 0$ . . . . .                                             | 38 |
| 19 | Comparisonwise error rates of the tests obtained under Model 1 and standard normal distribution when the group mean functions are not equal, i.e., $\delta \neq 0$ . . . . .     | 39 |
| 20 | Comparisonwise error rates of the tests obtained under Model 1 and $t$ -distribution $t_4/\sqrt{2}$ when the group mean functions are not equal, i.e., $\delta \neq 0$ . . . . . | 40 |
| 21 | Experimentwise power rates of the tests obtained under Model 1 and standard normal distribution . . . . .                                                                        | 41 |
| 22 | Experimentwise power rates of the tests obtained under Model 1 and $t$ -distribution $t_4/\sqrt{2}$ . . . . .                                                                    | 42 |
| 23 | Comparisonwise power rates of the tests obtained under Model 1 and standard normal distribution . . . . .                                                                        | 43 |
| 24 | Comparisonwise power rates of the tests obtained under Model 1 and $t$ -distribution $t_4/\sqrt{2}$ . . . . .                                                                    | 44 |
| 25 | The ACD power rates of the tests obtained under Model 1 and standard normal distribution . . . . .                                                                               | 45 |
| 26 | The ACD power rates of the tests obtained under Model 1 and $t$ -distribution $t_4/\sqrt{2}$ . . . . .                                                                           | 46 |
| 27 | Experimentwise and comparisonwise error rates of the tests obtained under Model 2 . . . . .                                                                                      | 47 |
| 28 | Experimentwise, comparisonwise and ACD power rates of the tests obtained under Model 2 . . . . .                                                                                 | 48 |
| 29 | Experimentwise and comparisonwise error rates of the tests obtained under Model 3 and standard normal distribution . . . . .                                                     | 49 |
| 30 | Experimentwise power rates of the tests obtained under Model 3 and standard normal distribution . . . . .                                                                        | 50 |
| 31 | Comparisonwise power rates of the tests obtained under Model 3 and standard normal distribution . . . . .                                                                        | 51 |
| 32 | The ACD power rates of the tests obtained under Model 3 and standard normal distribution . . . . .                                                                               | 52 |
| 33 | Experimentwise and comparisonwise error rates of the tests obtained under Model 4 and standard normal distribution . . . . .                                                     | 53 |
| 34 | Experimentwise power rates of the tests obtained under Model 4 and standard normal distribution . . . . .                                                                        | 54 |
| 35 | Comparisonwise power rates of the tests obtained under Model 4 and standard normal distribution . . . . .                                                                        | 55 |
| 36 | The ACD power rates of the tests obtained under Model 4 and standard normal distribution . . . . .                                                                               | 56 |

|    |                                                                                                                              |    |
|----|------------------------------------------------------------------------------------------------------------------------------|----|
| 37 | Experimentwise and comparisonwise error rates of the tests obtained under Model 5 and standard normal distribution . . . . . | 57 |
| 38 | Experimentwise power rates of the tests obtained under Model 5 and standard normal distribution . . . . .                    | 58 |
| 39 | Comparisonwise power rates of the tests obtained under Model 5 and standard normal distribution . . . . .                    | 59 |
| 40 | The ACD power rates of the tests obtained under Model 5 and standard normal distribution . . . . .                           | 60 |
| 41 | Experimentwise and comparisonwise error rates of the tests obtained under Model 6 and standard normal distribution . . . . . | 61 |
| 42 | Experimentwise power rates of the tests obtained under Model 6 and standard normal distribution . . . . .                    | 62 |
| 43 | Comparisonwise power rates of the tests obtained under Model 6 and standard normal distribution . . . . .                    | 63 |
| 44 | The ACD power rates of the tests obtained under Model 6 and standard normal distribution . . . . .                           | 64 |

## References

- [1] Imhof, J. P. (1961). Computing the distribution of quadratic forms in normal variables. *Biometrika*, **48**, 419–426.

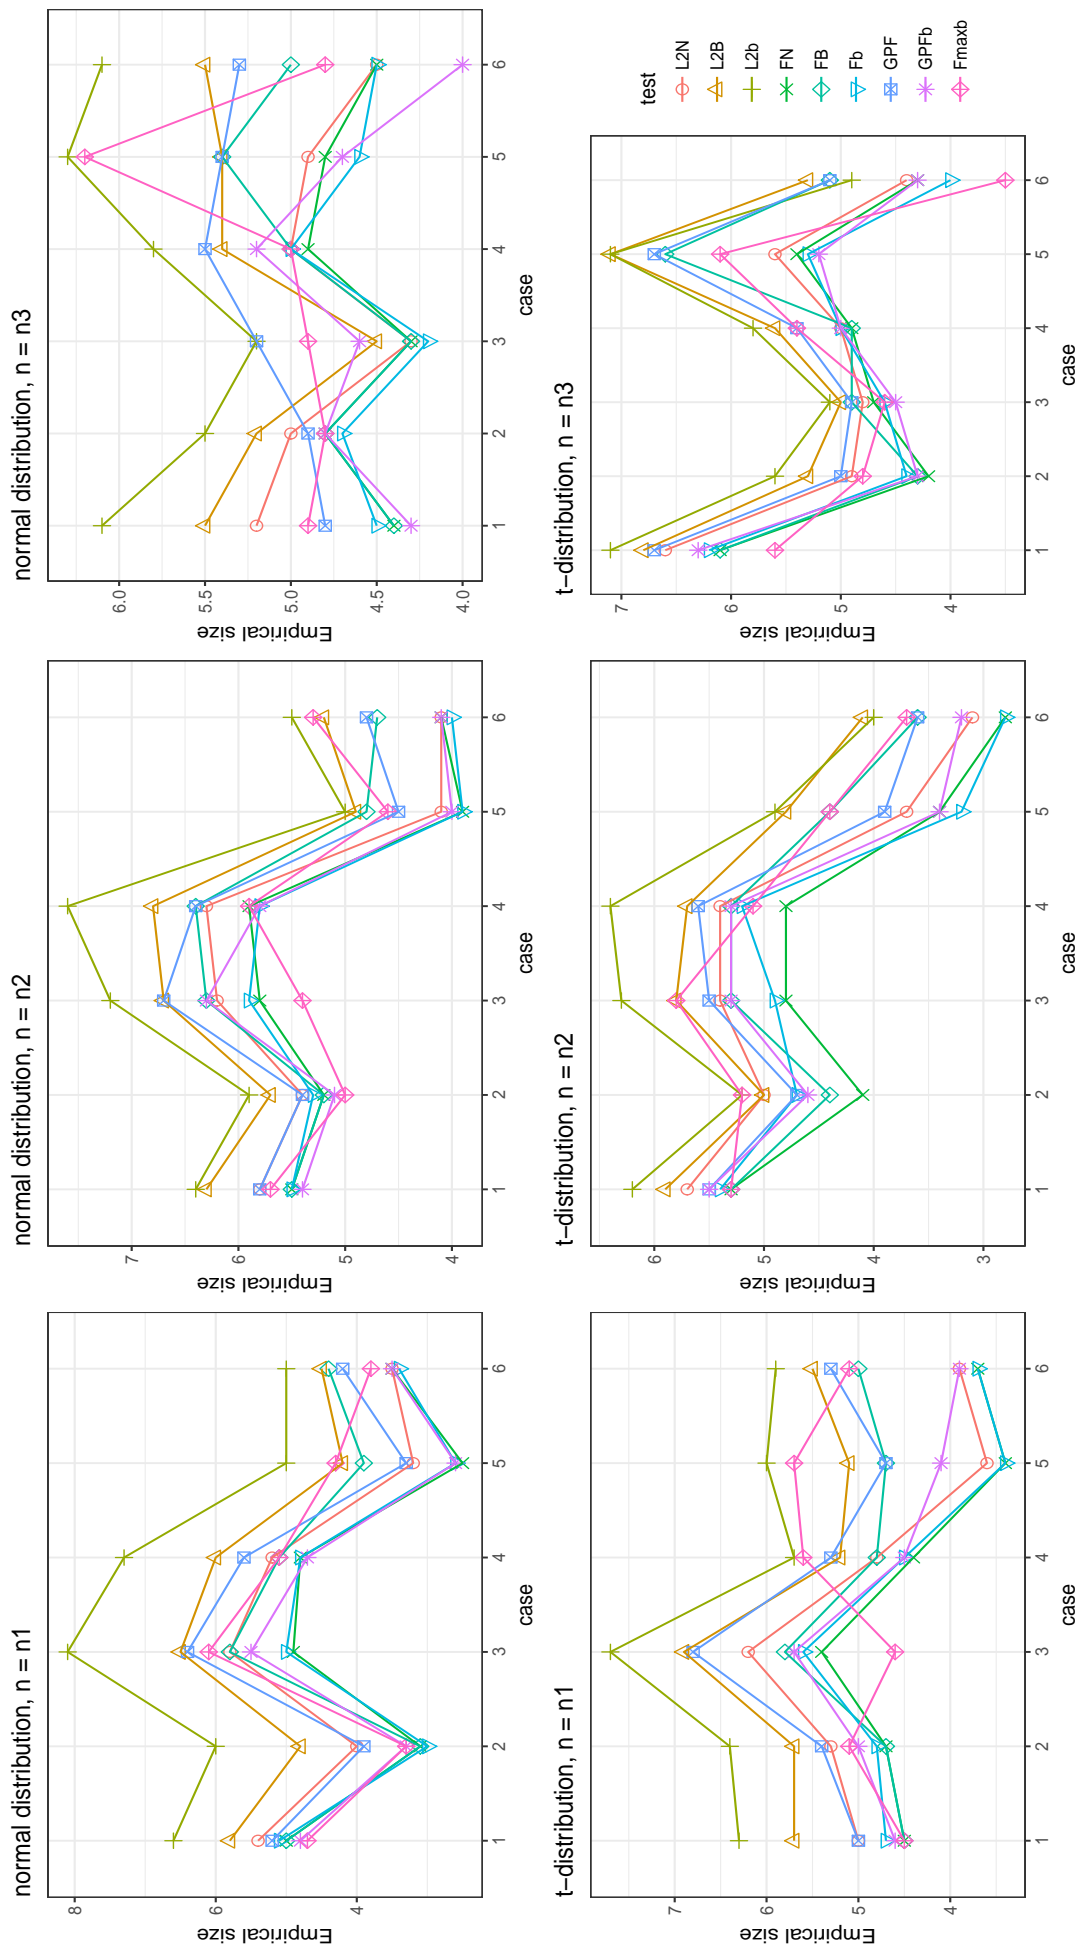

Figure 1: Empirical sizes (as percentages) of the tests obtained for  $C_1$  under Model 1 for cases of  $(\rho, M)$ : 1.  $(0.1, 80)$ , 2.  $(0.1, 150)$ , 3.  $(0.5, 80)$ , 4.  $(0.5, 150)$ , 5.  $(0.9, 80)$ , 6.  $(0.9, 150)$  ( $\delta = 0$ ,  $\mathbf{n}_1 = (10, 10, 10, 10)$ ,  $\mathbf{n}_2 = (20, 20, 20, 20)$ ,  $\mathbf{n}_3 = (10, 20, 15, 30)$ ,  $n_r = 1000$ ,  $n_{boot} = 10,000$ ,  $\alpha = 5\%$ ). See also Table 3.

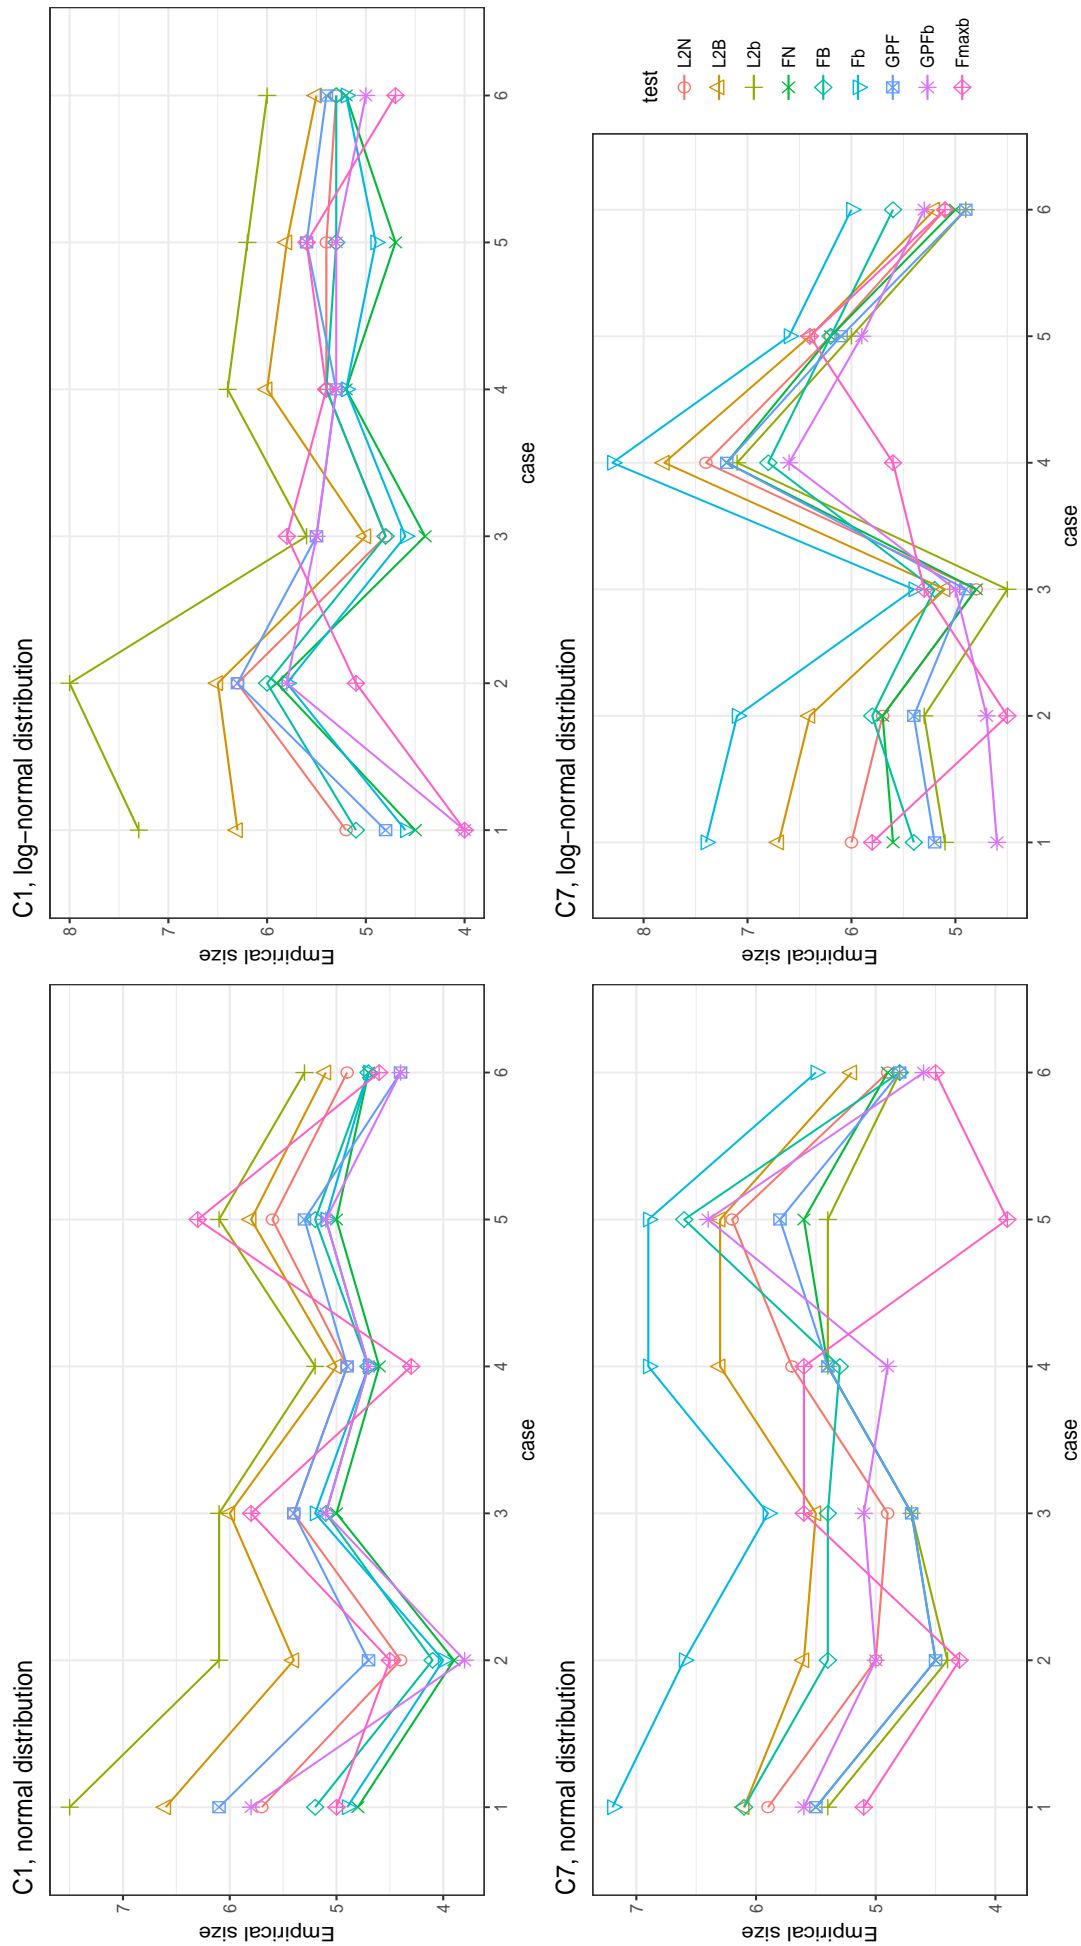

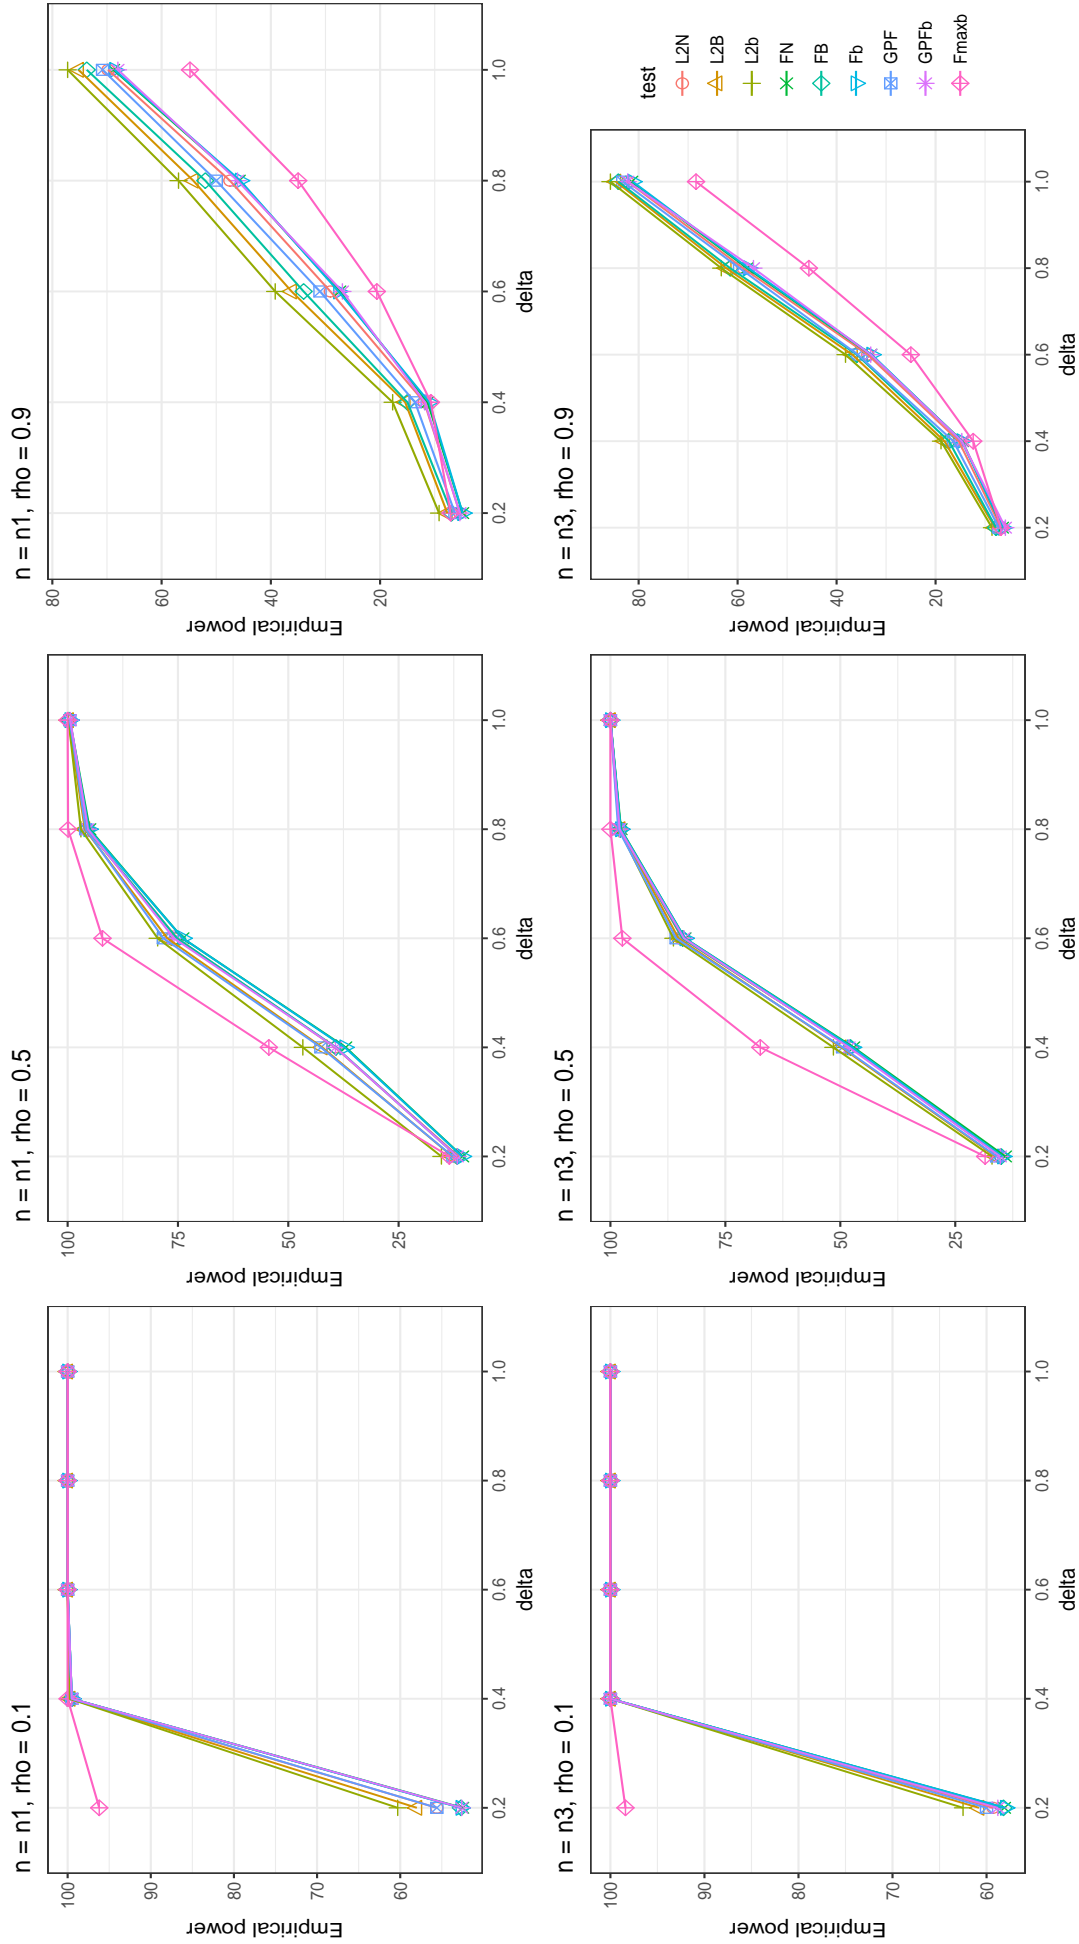

Figure 3: Empirical powers (as percentages) of the tests obtained for  $C_2$  under Model 1 and standard normal distribution ( $M = 80$ ,  $\delta \neq 0$ ,  $\mathbf{n}_1 = (10, 10, 10, 10)$ ,  $\mathbf{n}_3 = (10, 20, 15, 30)$ ,  $n_{boot} = 10,000$ ,  $\alpha = 5\%$ ). For  $M = 150$ , the results were very similar, and, therefore, they are omitted. See also Tables 6 and 7.

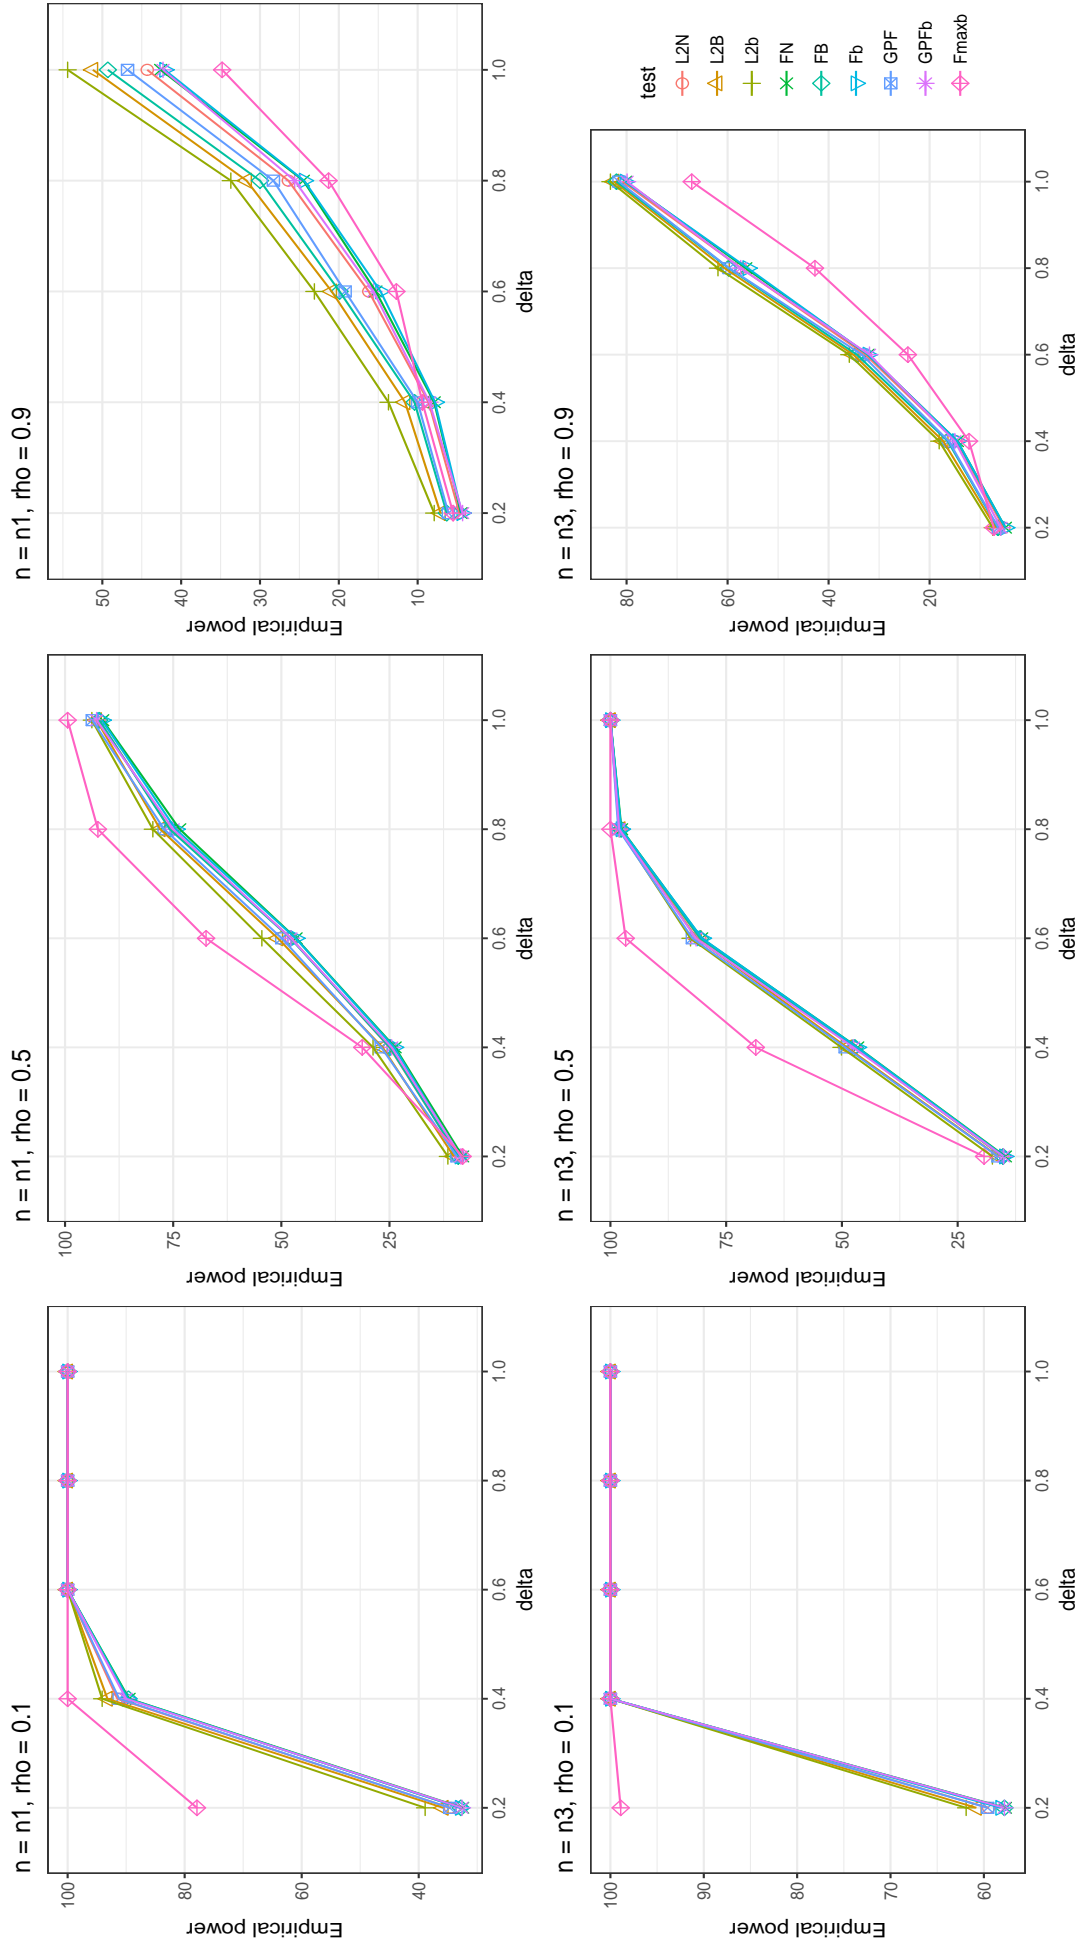

Figure 4: Empirical powers (as percentages) of the tests obtained for  $C_7$  under Model 1 and standard normal distribution ( $M = 80$ ,  $\delta \neq 0$ ,  $\mathbf{n}_1 = (10, 10, 10, 10)$ ,  $\mathbf{n}_3 = (10, 20, 15, 30)$ ,  $nr = 1000$ ,  $nboot = 10,000$ ,  $\alpha = 5\%$ ). For  $M = 150$ , the results were very similar, and, therefore, they are omitted. See also Tables 8 and 9.



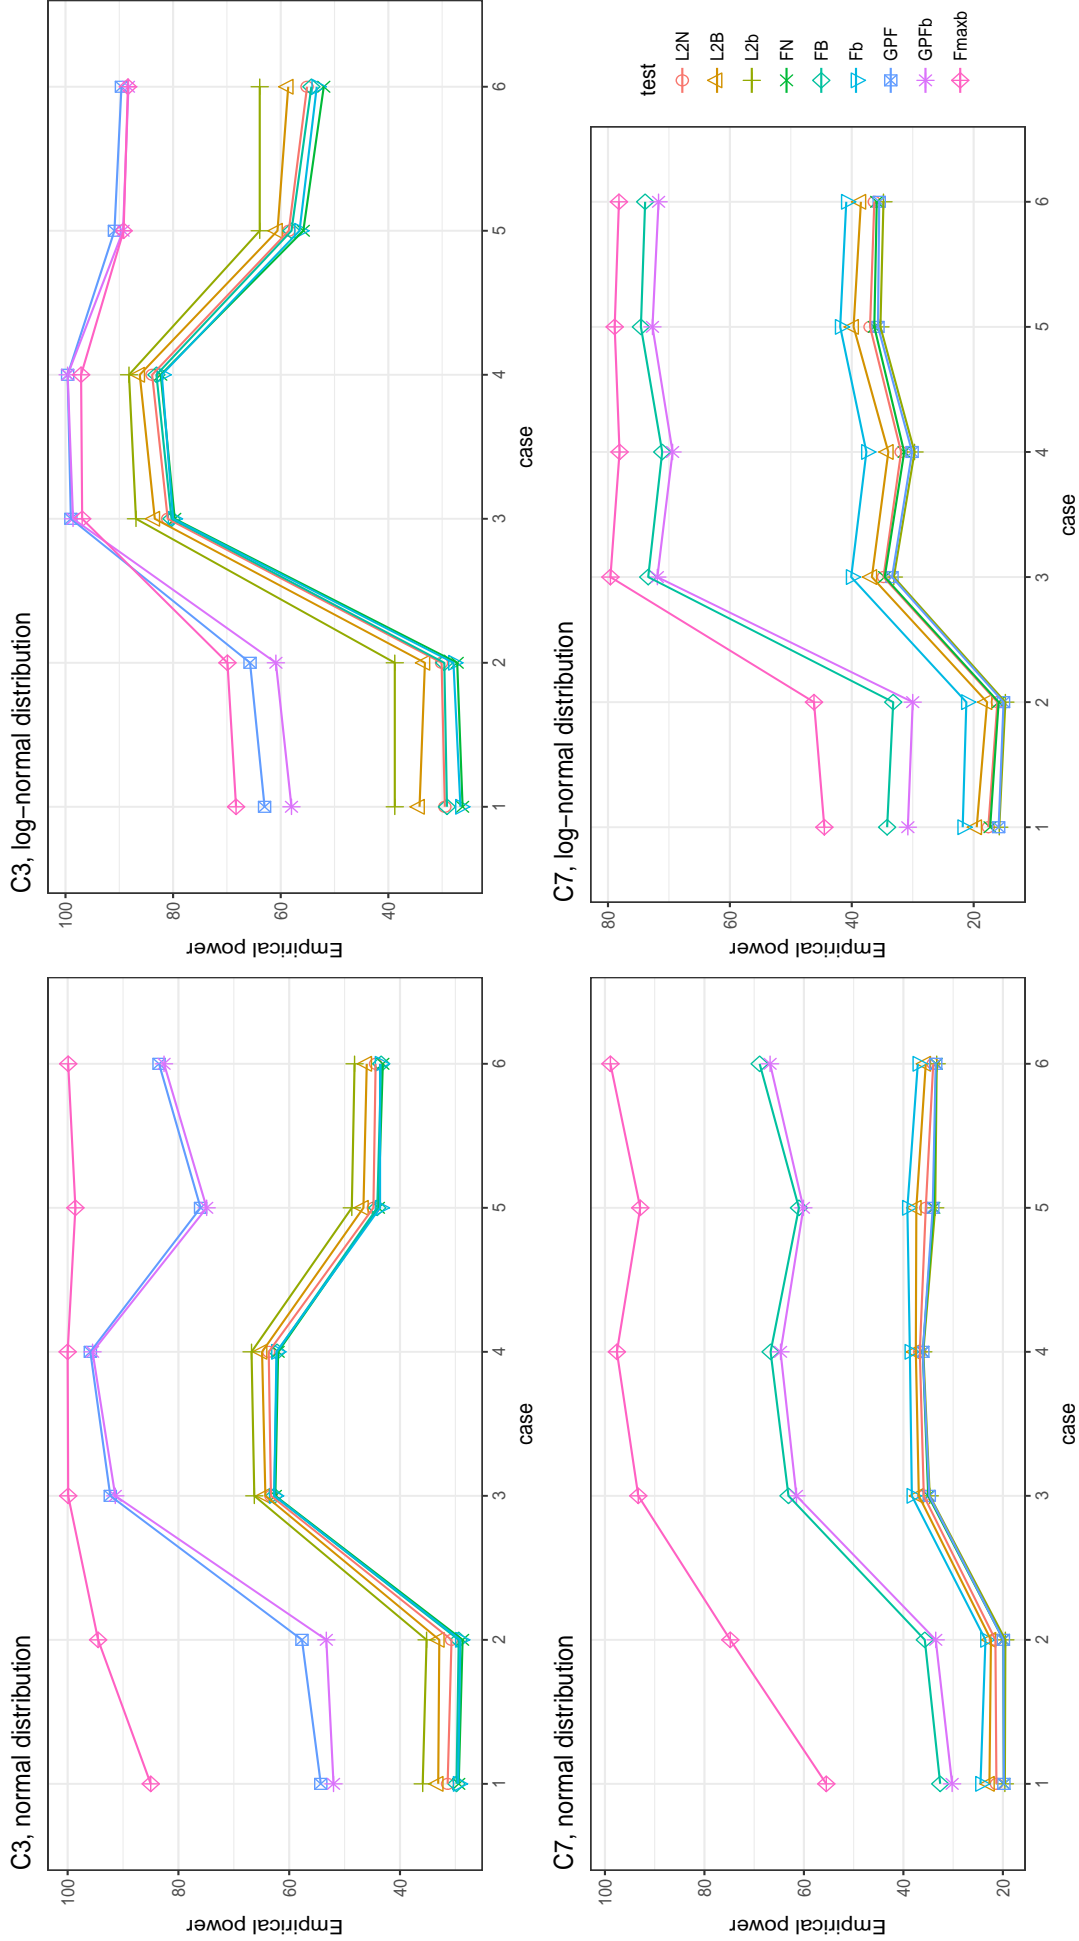

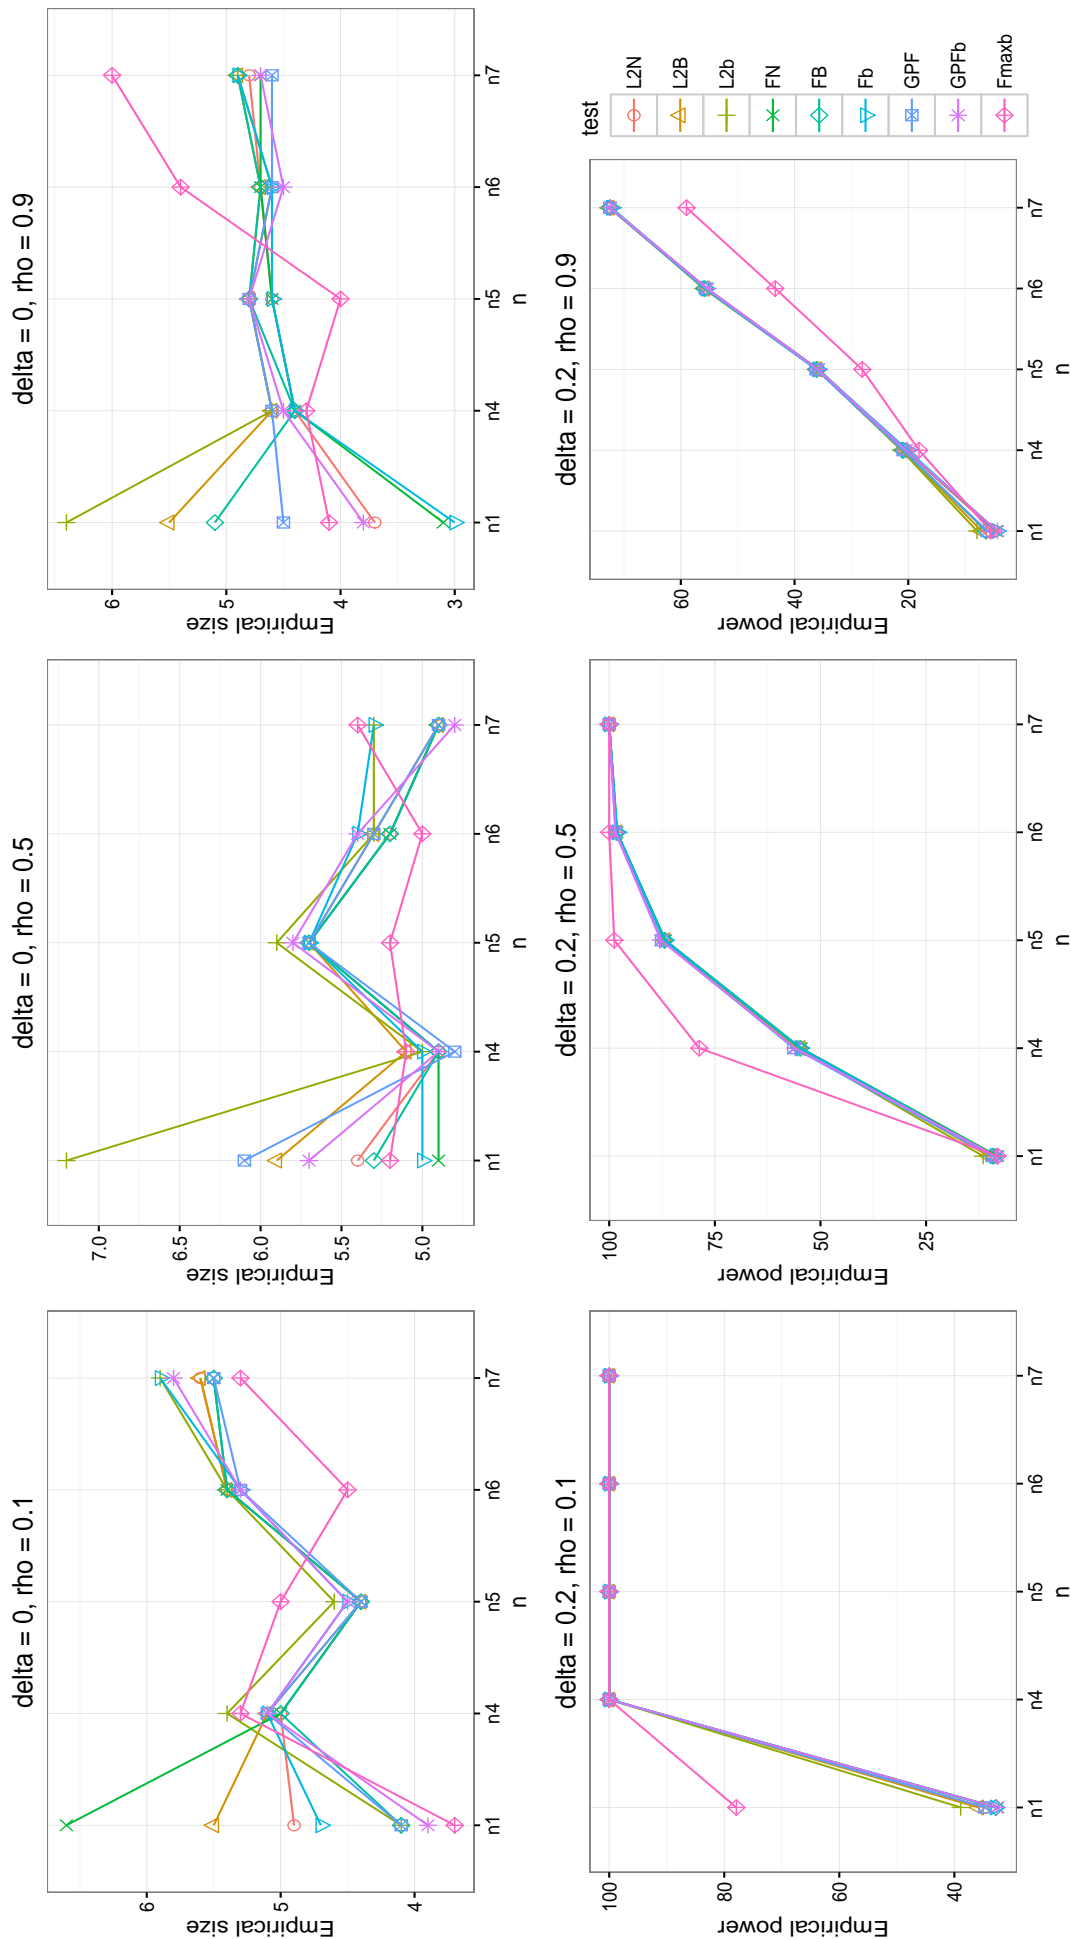

Figure 6: Empirical sizes and powers (as percentages) of the tests obtained for  $C_7$  under Model 1 and standard normal distribution, when the number of observations is larger ( $M = 80$ ,  $\mathbf{n}_1 = (10, 10, 10, 10)$ ,  $\mathbf{n}_4 = (100, 100, 100, 100)$ ,  $\mathbf{n}_5 = (200, 200, 200, 200)$ ,  $\mathbf{n}_6 = (300, 300, 300, 300)$ ,  $\mathbf{n}_7 = (400, 400, 400, 400)$ ,  $n_r = 1000$ ,  $n_{boot} = 10,000$ ,  $\alpha = 5\%$ ).

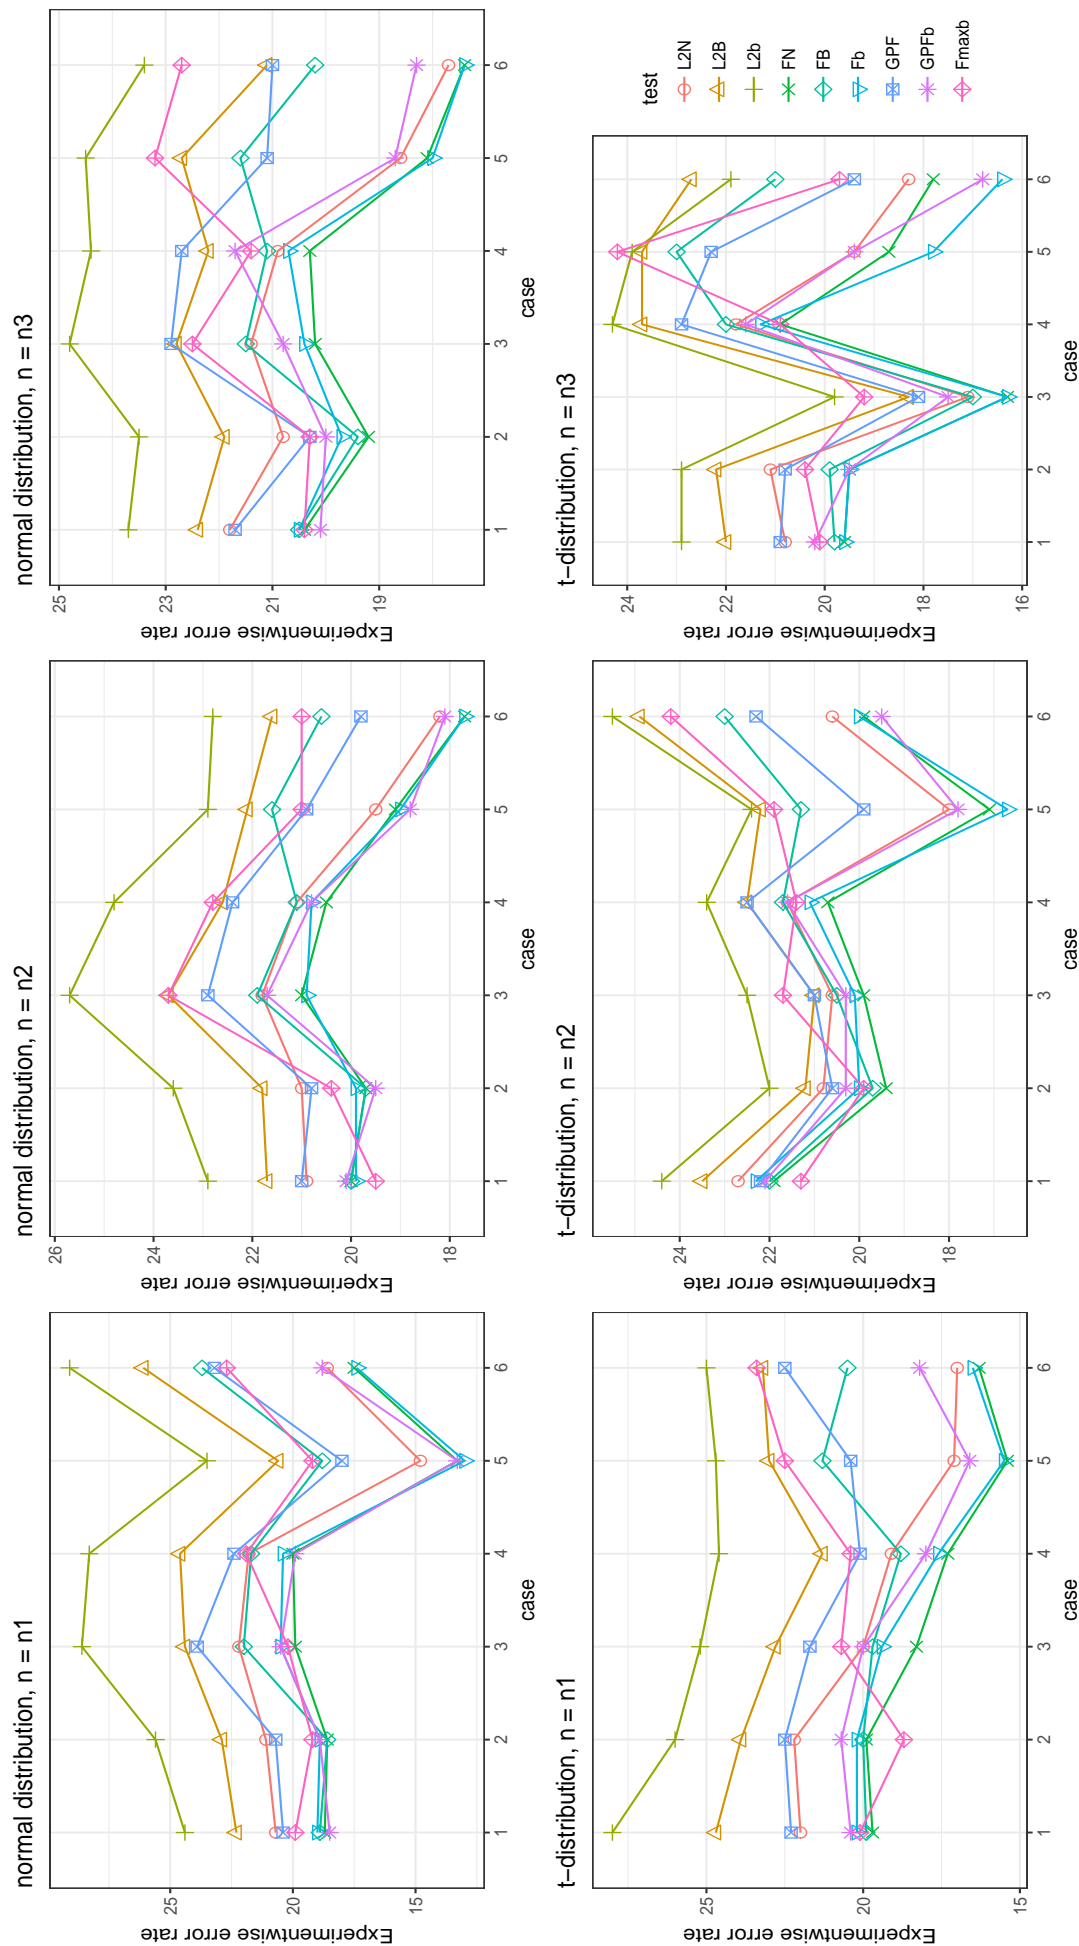

Figure 7: Experimentwise error rates (as percentages) of the tests obtained under Model 1 when all group mean functions are equal, i.e.,  $\delta = 0$ , for cases of  $(\rho, M)$ : 1.  $(0.1, 80)$ , 2.  $(0.1, 150)$ , 3.  $(0.5, 80)$ , 4.  $(0.5, 150)$ , 5.  $(0.9, 80)$ , 6.  $(0.9, 150)$  ( $\mathbf{n}_1 = (10, 10, 10, 10)$ ,  $\mathbf{n}_2 = (20, 20, 20, 20)$ ,  $\mathbf{n}_3 = (10, 20, 15, 30)$ ,  $nr = 1000$ ,  $nboot = 10,000$ ,  $\alpha = 5\%$ ). See also Table 15.

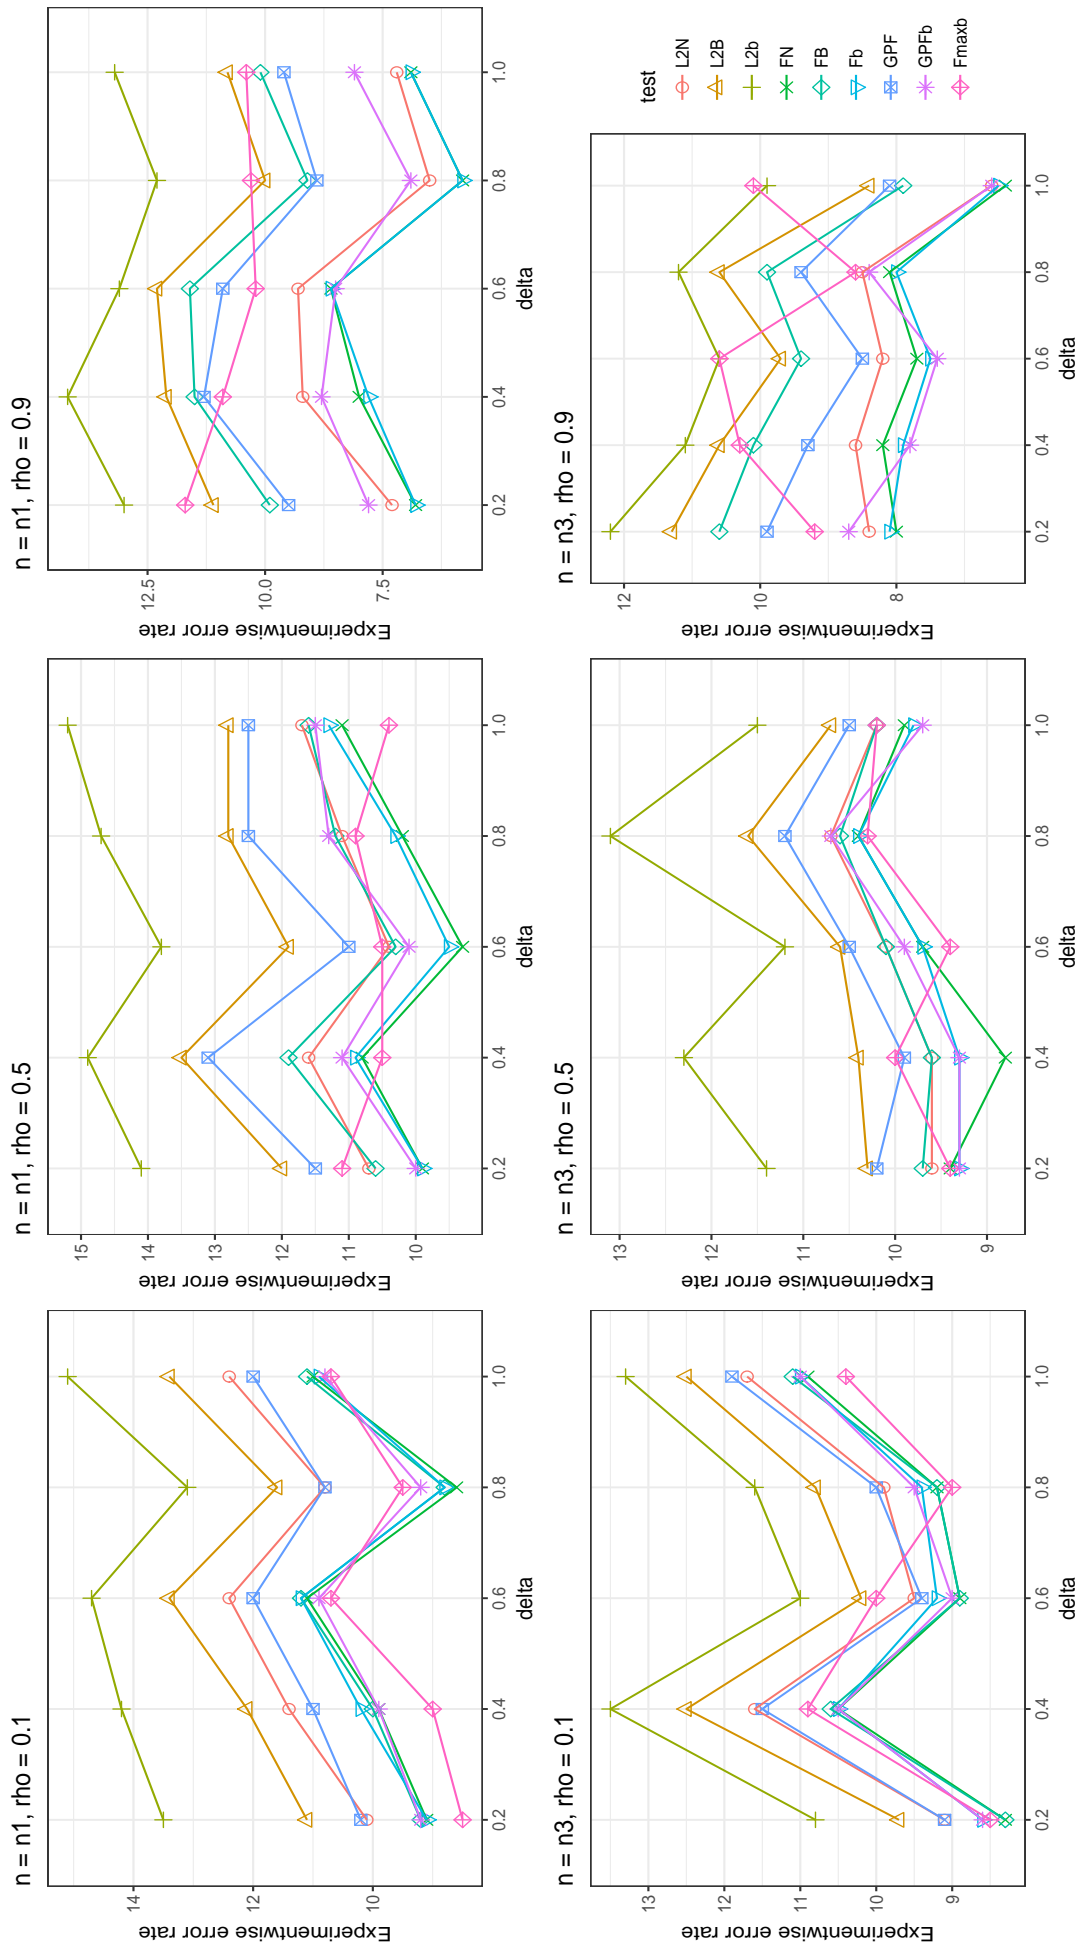

Figure 8: Experimentwise error rates (as percentages) of the tests obtained under Model 1 and standard normal distribution when the group mean functions are not equal, i.e.,  $\delta \neq 0$  ( $M = 80$ ,  $\mathbf{n}_1 = (10, 10, 10, 10)$ ,  $\mathbf{n}_3 = (10, 20, 15, 30)$ ,  $nr = 1000$ ,  $nboot = 10,000$ ,  $\alpha = 5\%$ ). For  $M = 150$ , the results were very similar, and, therefore, they are omitted. See also Tables 16 and 17.

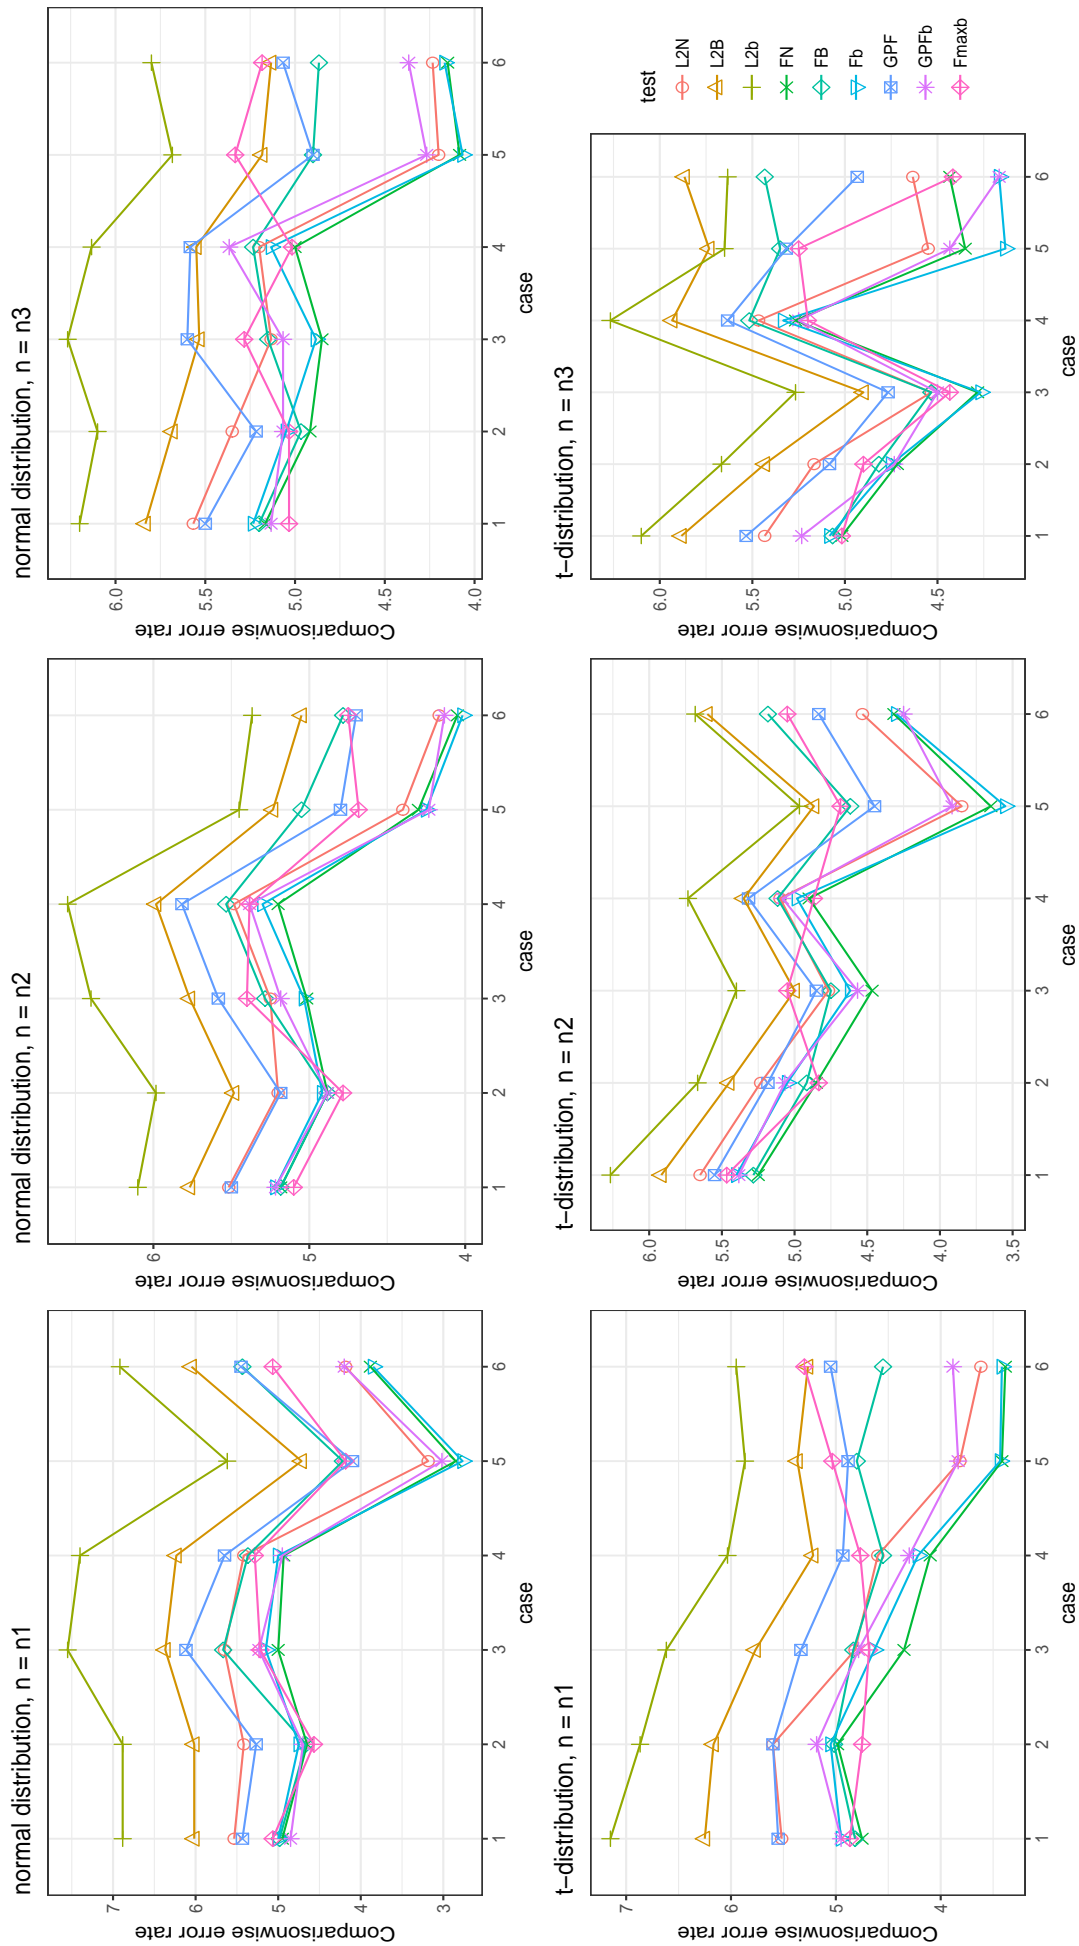

Figure 9: Comparisonwise error rates (as percentages) of the tests obtained under Model 1 when all group mean functions are equal, i.e.,  $\delta = 0$ , for cases of  $(\rho, M)$ : 1. (0.1, 80), 2. (0.1, 150), 3. (0.5, 80), 4. (0.5, 150), 5. (0.9, 80), 6. (0.9, 150) ( $\mathbf{n}_1 = (10, 10, 10, 10)$ ,  $\mathbf{n}_2 = (20, 20, 20, 20)$ ,  $\mathbf{n}_3 = (10, 20, 15, 30)$ ,  $n_r = 1000$ ,  $n_{boot} = 10,000$ ,  $\alpha = 5\%$ ). See also Table 18.

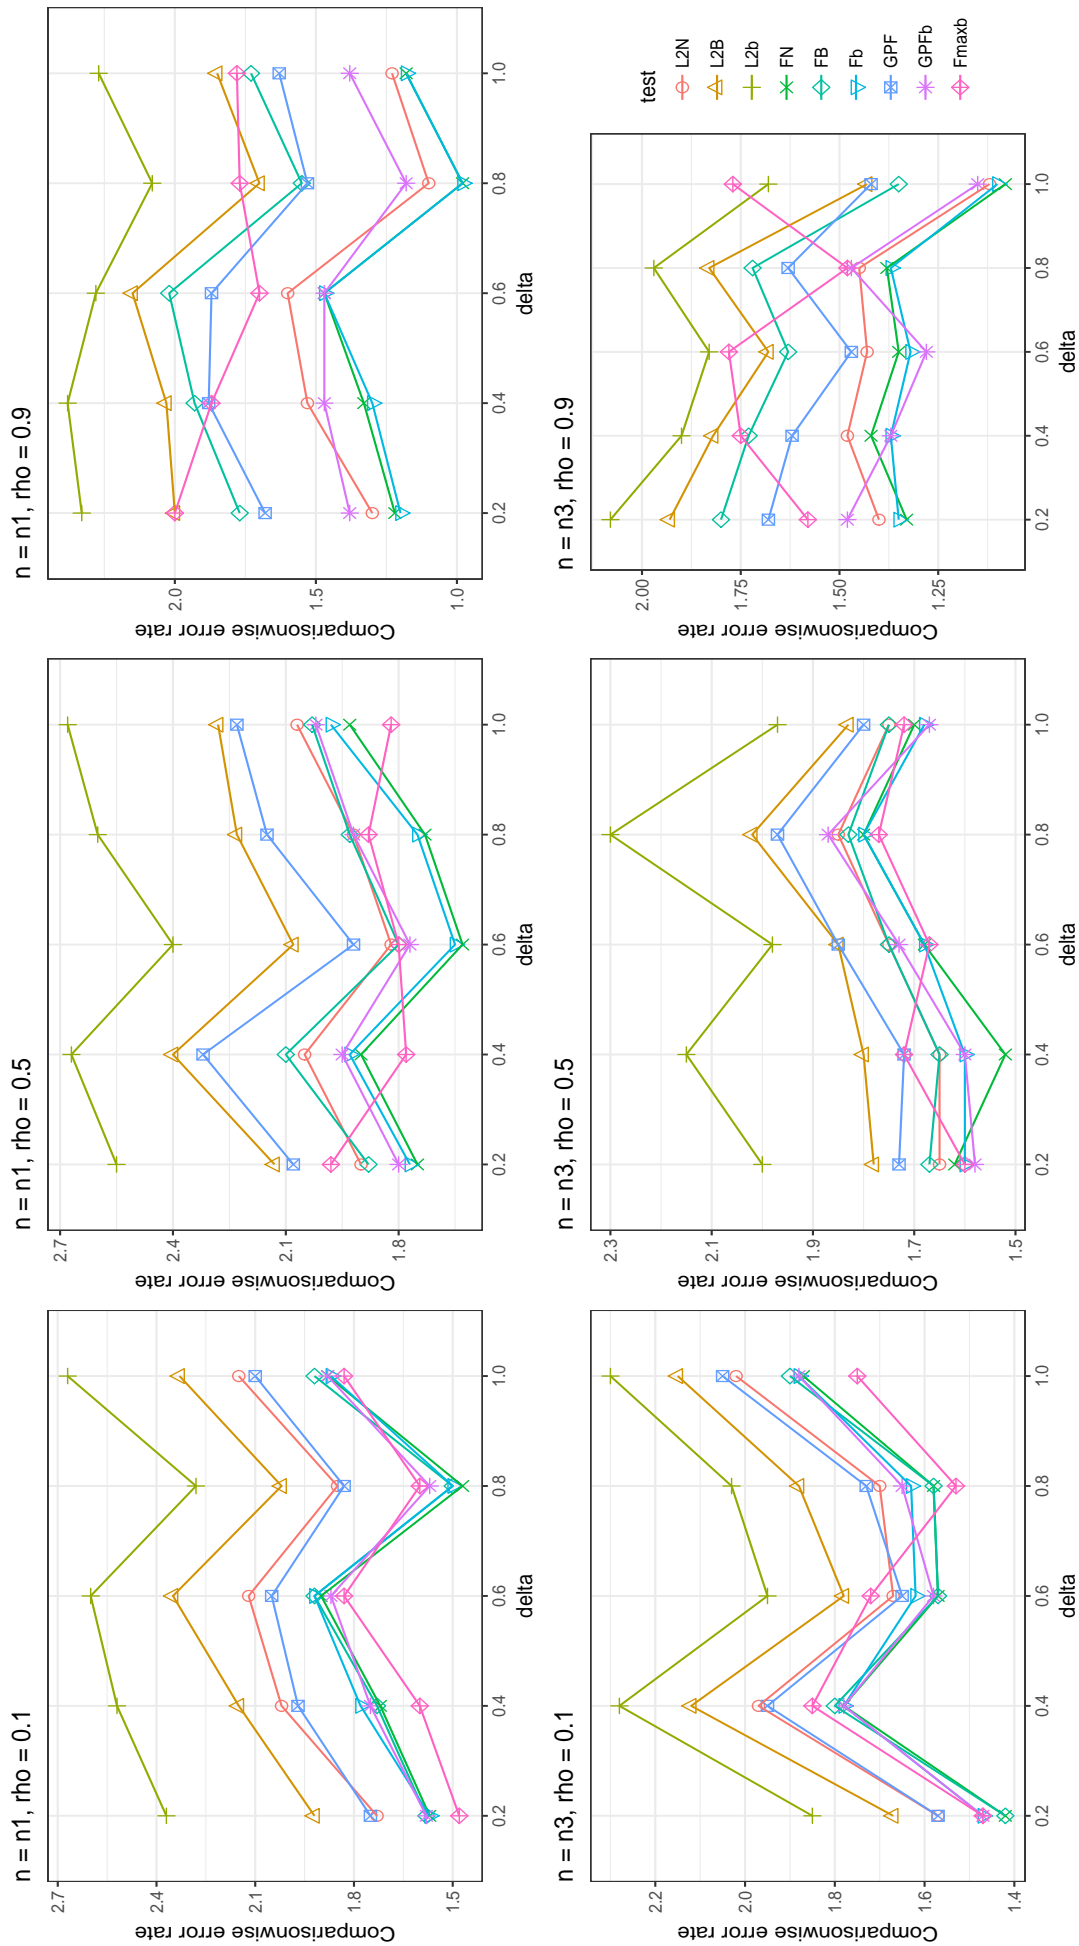

Figure 10: Comparisonwise error rates (as percentages) of the tests obtained under Model 1 and standard normal distribution when the group mean functions are not equal, i.e.,  $\delta \neq 0$  ( $M = 80$ ,  $\mathbf{n}_1 = (10, 10, 10, 10)$ ,  $\mathbf{n}_3 = (10, 20, 15, 30)$ ,  $nr = 1000$ ,  $nboot = 10,000$ ,  $\alpha = 5\%$ ). For  $M = 150$ , the results were very similar, and, therefore, they are omitted. See also Tables 19 and 20.

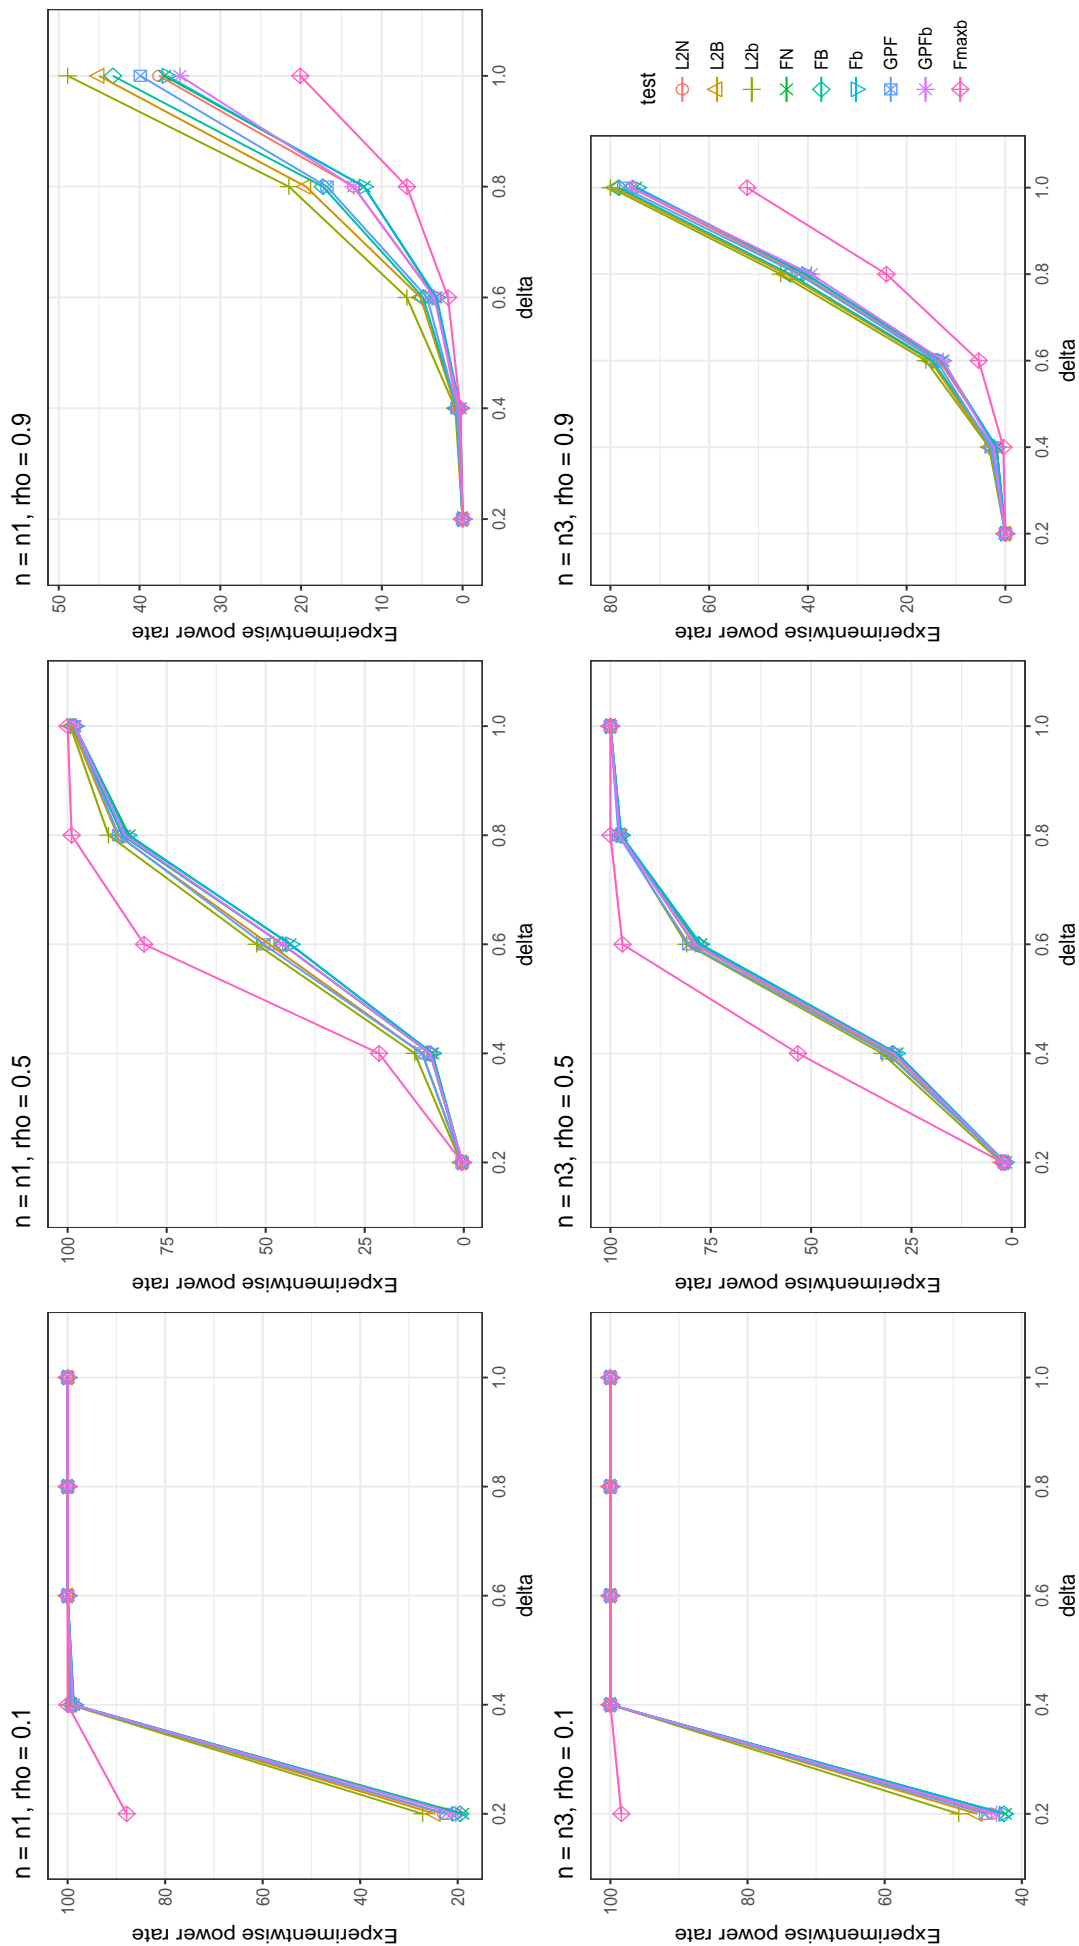



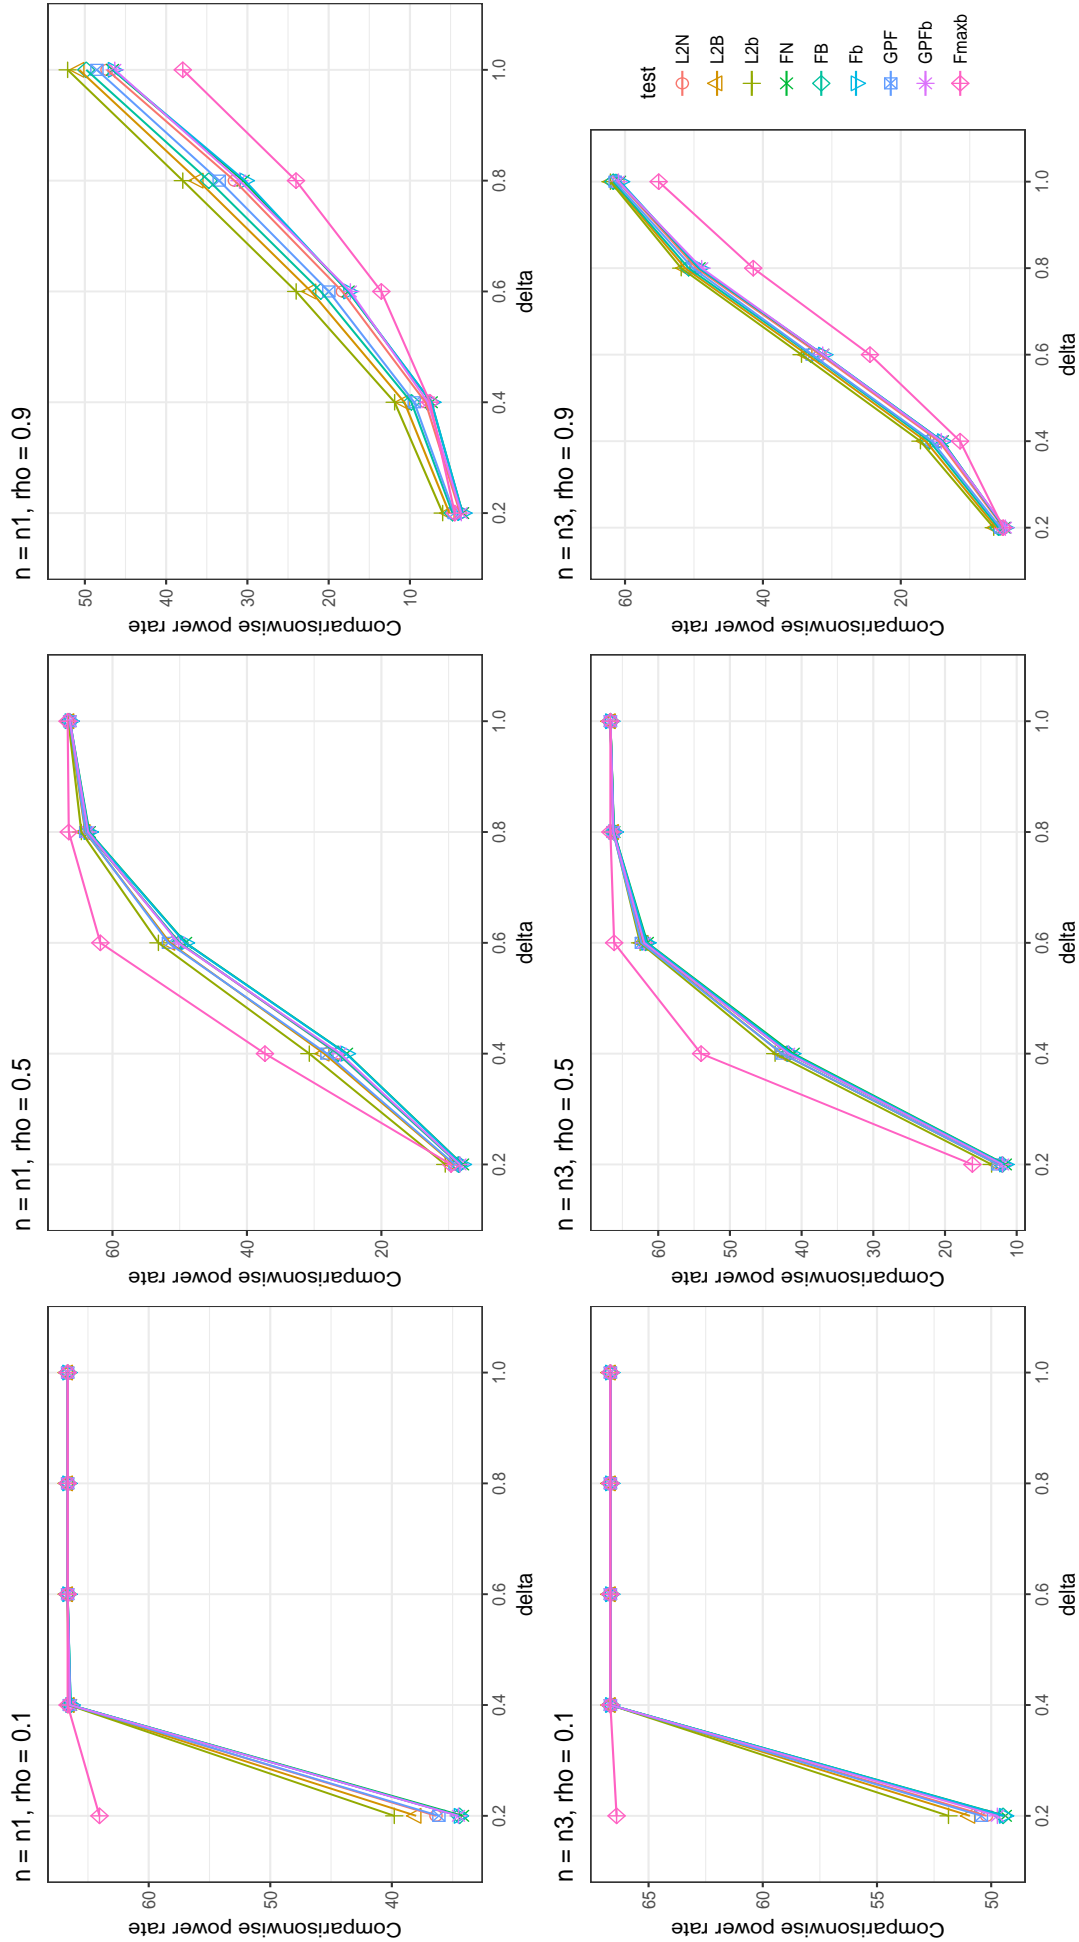

Figure 12: Comparisonwise power rates (as percentages) of the tests obtained under Model 1 and standard normal distribution ( $M = 80$ ,  $\delta \neq 0$ ,  $\mathbf{n}_1 = (10, 10, 10, 10)$ ,  $\mathbf{n}_3 = (10, 20, 15, 30)$ ,  $nr = 1000$ ,  $nboot = 10,000$ ,  $\alpha = 5\%$ ). For  $M = 150$ , the results were very similar, and, therefore, they are omitted. See also Tables 23 and 24.



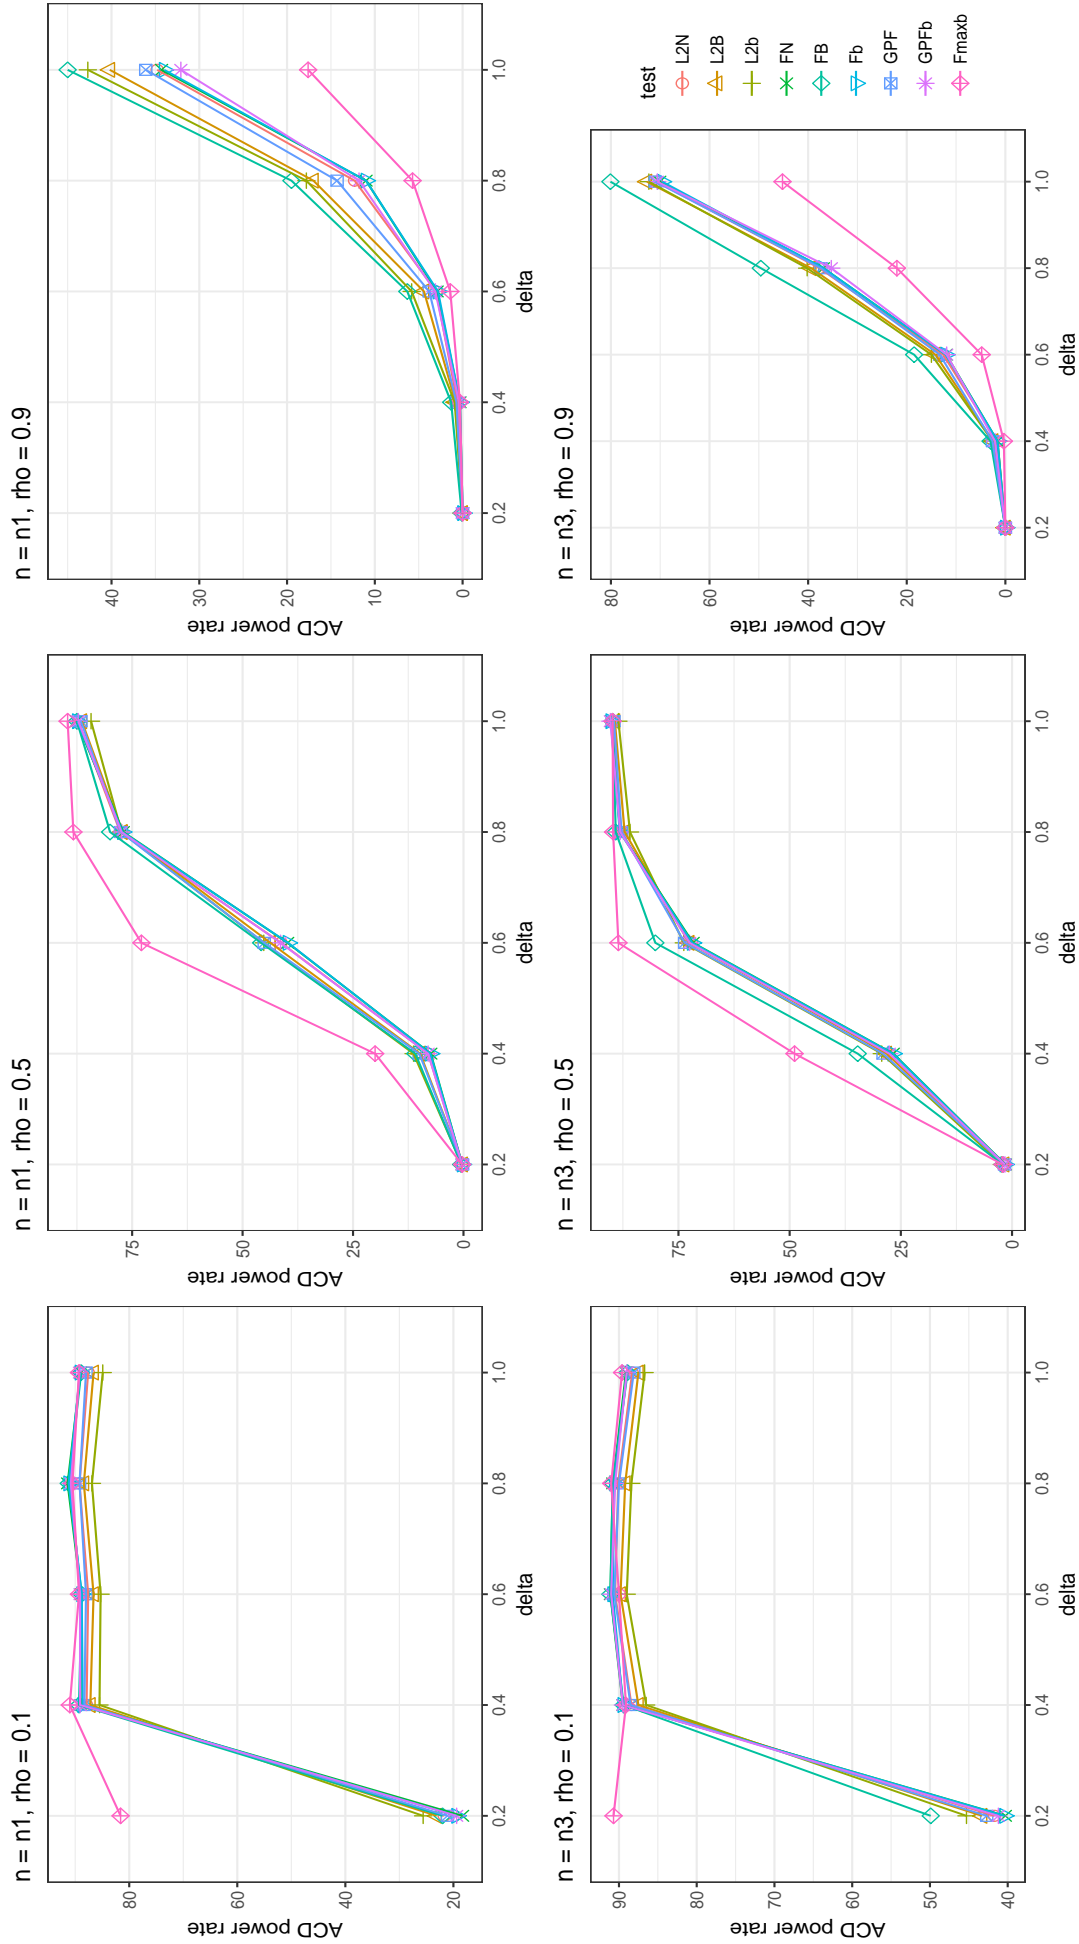

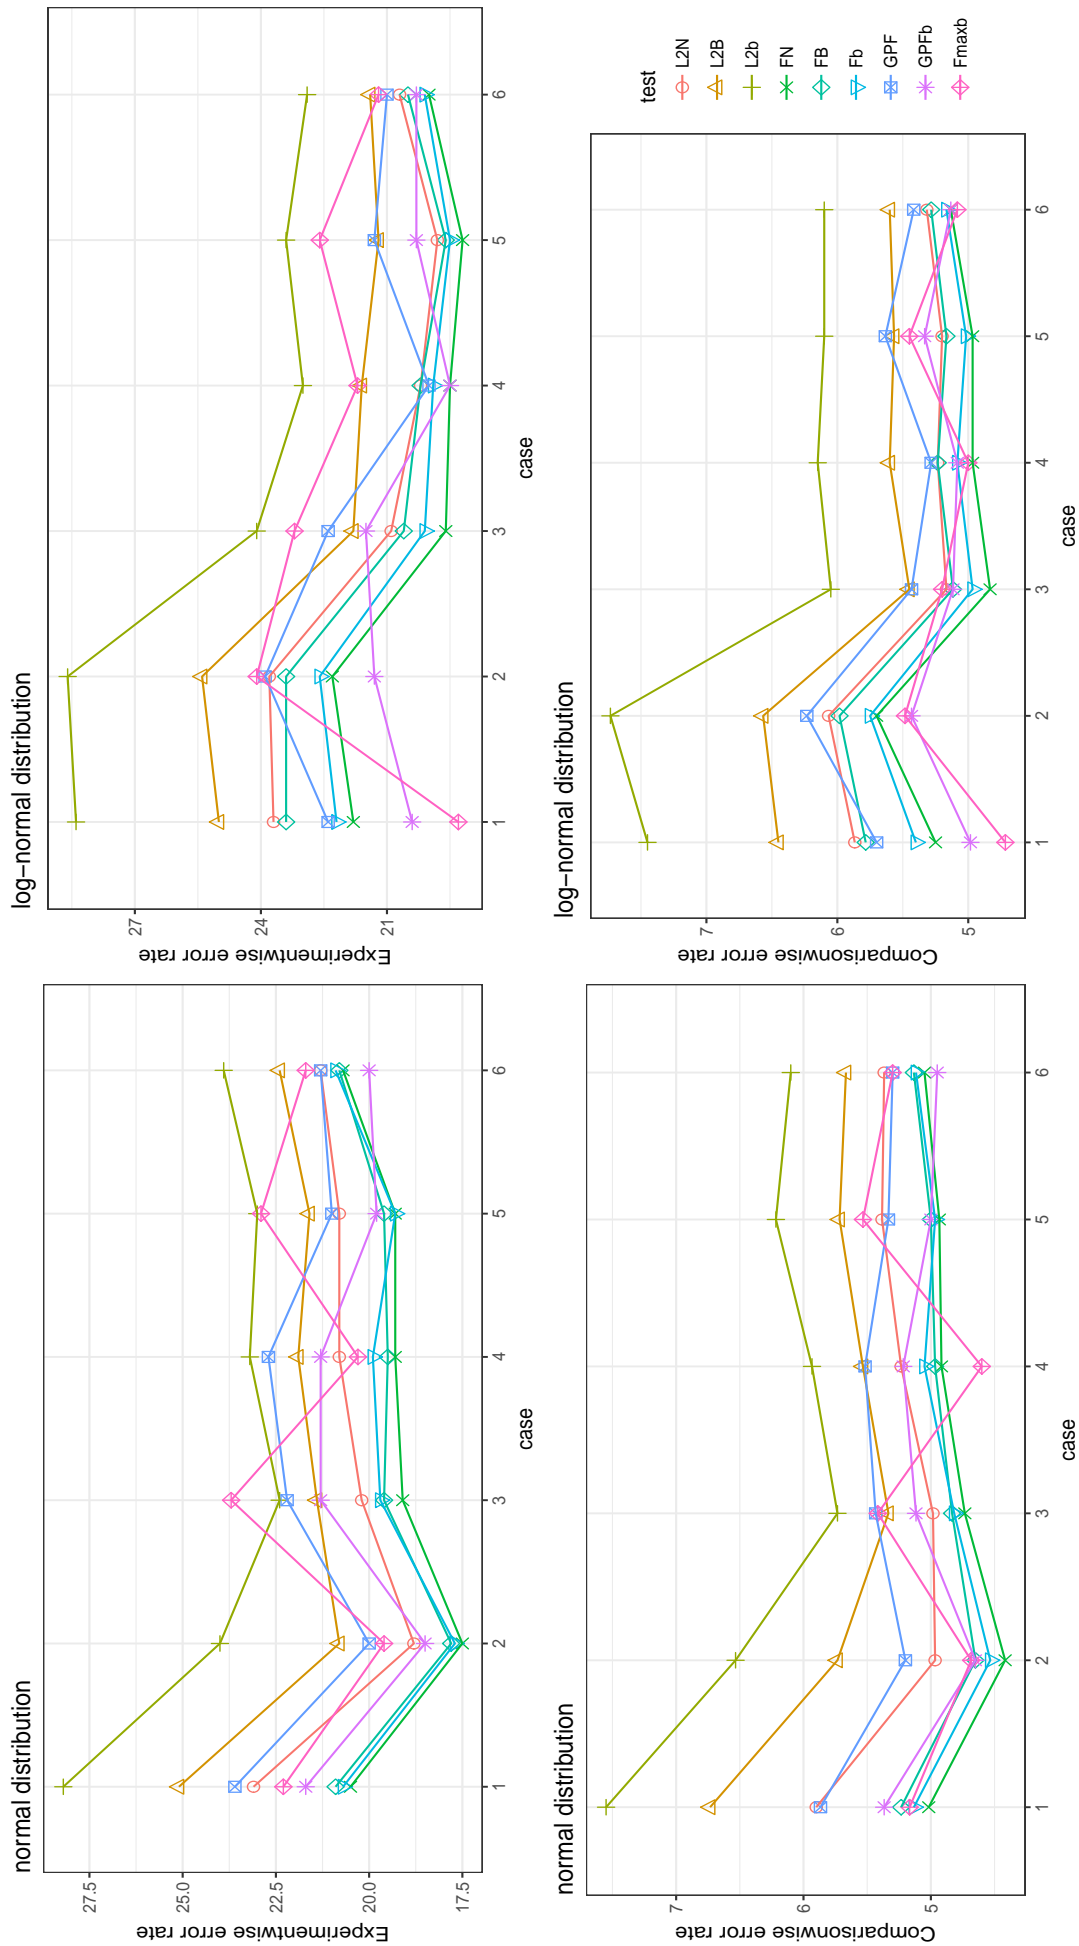

Figure 14: Experimentwise and comparisonwise error rates (as percentages) of the tests obtained under Model 2 and equal group mean functions for cases of  $(\mathbf{n}, M)$ : 1.  $(\mathbf{n}_1, 40)$ , 2.  $(\mathbf{n}_1, 80)$ , 3.  $(\mathbf{n}_2, 40)$ , 4.  $(\mathbf{n}_2, 80)$ , 5.  $(\mathbf{n}_3, 40)$ , 6.  $(\mathbf{n}_3, 80)$ , where  $\mathbf{n}_1 = (10, 10, 10, 10)$ ,  $\mathbf{n}_2 = (20, 20, 20, 20)$ ,  $\mathbf{n}_3 = (10, 20, 15, 30)$  ( $nr = 1000$ ,  $nboot = 10,000$ ,  $\alpha = 5\%$ ). See also Table 27.

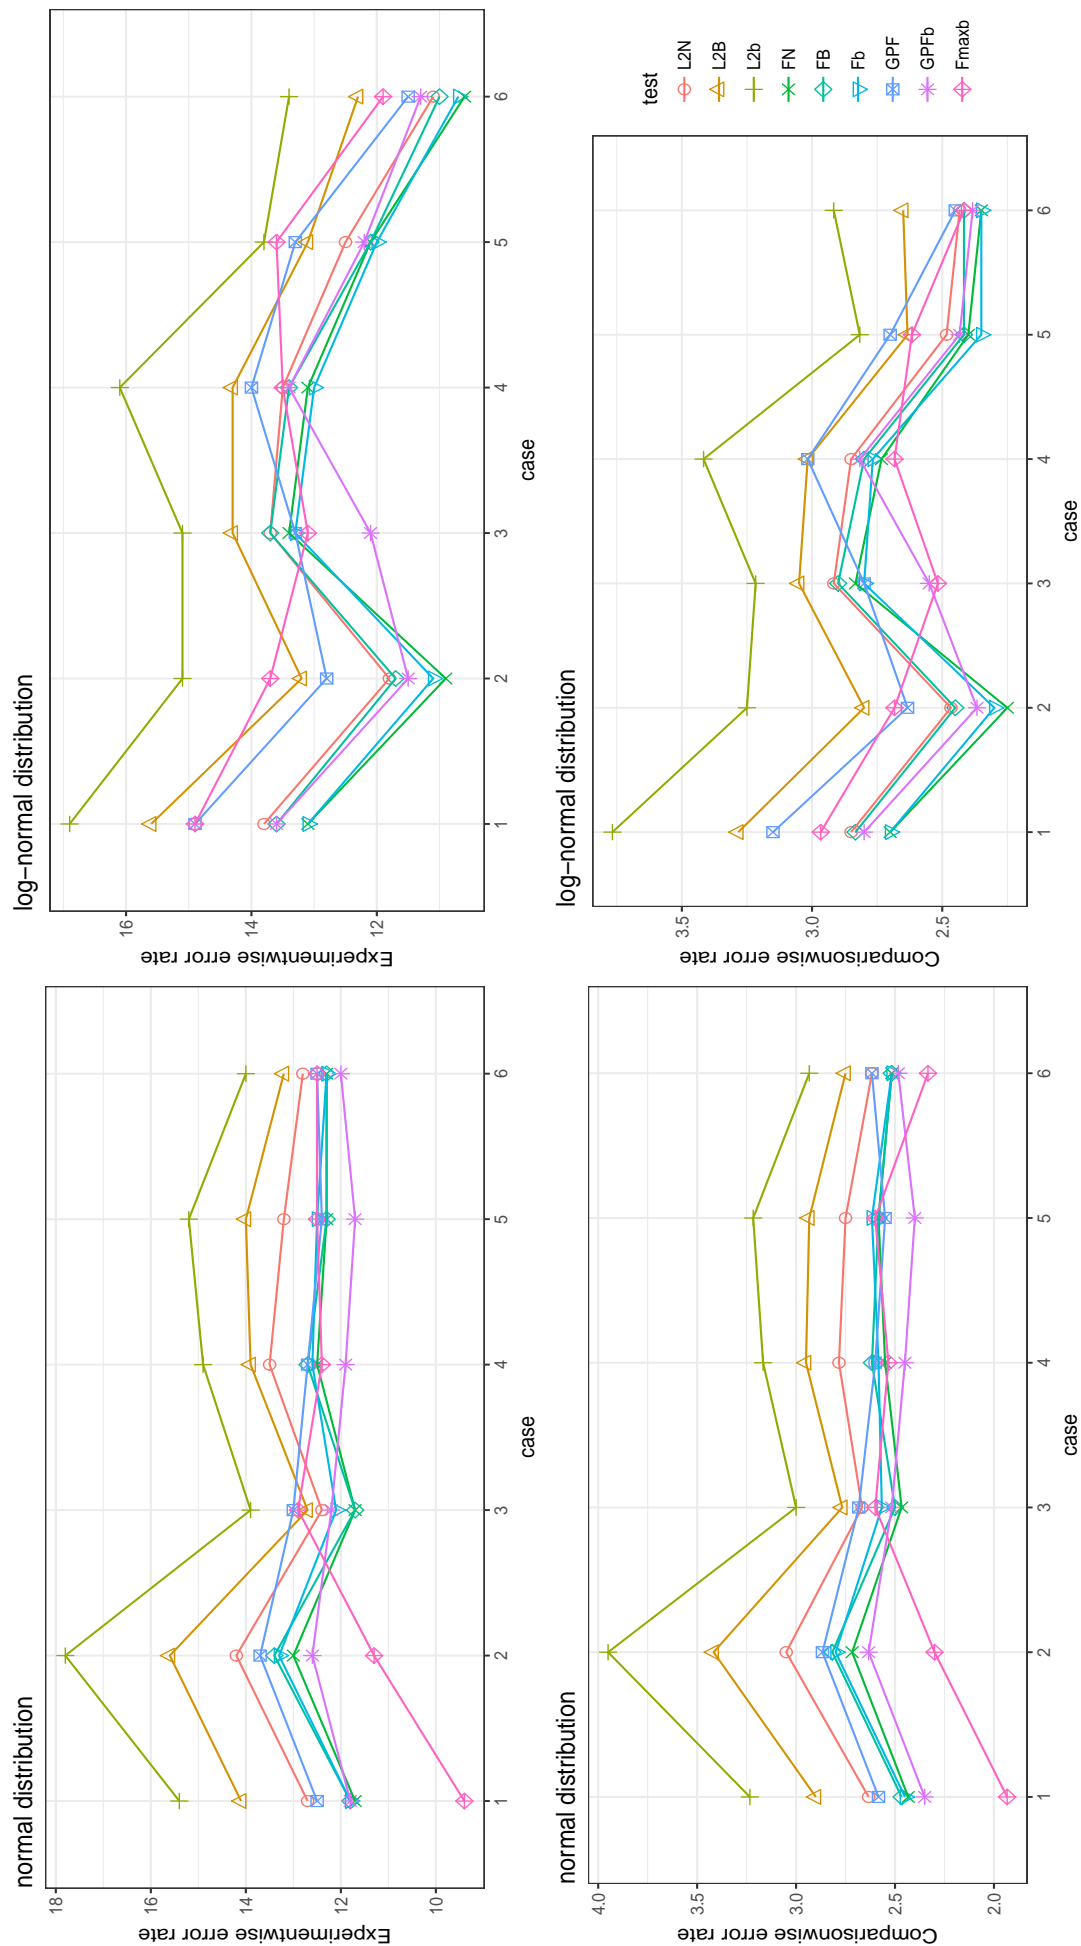

Figure 15: Experimentwise and comparisonwise error rates (as percentages) of the tests obtained under Model 2 and unequal group mean functions for cases of  $(\mathbf{n}, M)$ : 1.  $(\mathbf{n}_1, 40)$ , 2.  $(\mathbf{n}_1, 80)$ , 3.  $(\mathbf{n}_2, 40)$ , 4.  $(\mathbf{n}_2, 80)$ , 5.  $(\mathbf{n}_3, 40)$ , 6.  $(\mathbf{n}_3, 80)$ , where  $\mathbf{n}_1 = (10, 10, 10, 10)$ ,  $\mathbf{n}_2 = (20, 20, 20, 20)$ ,  $\mathbf{n}_3 = (10, 20, 15, 30)$  ( $nr = 1000$ ,  $nboot = 10,000$ ,  $\alpha = 5\%$ ). See also Table 27.

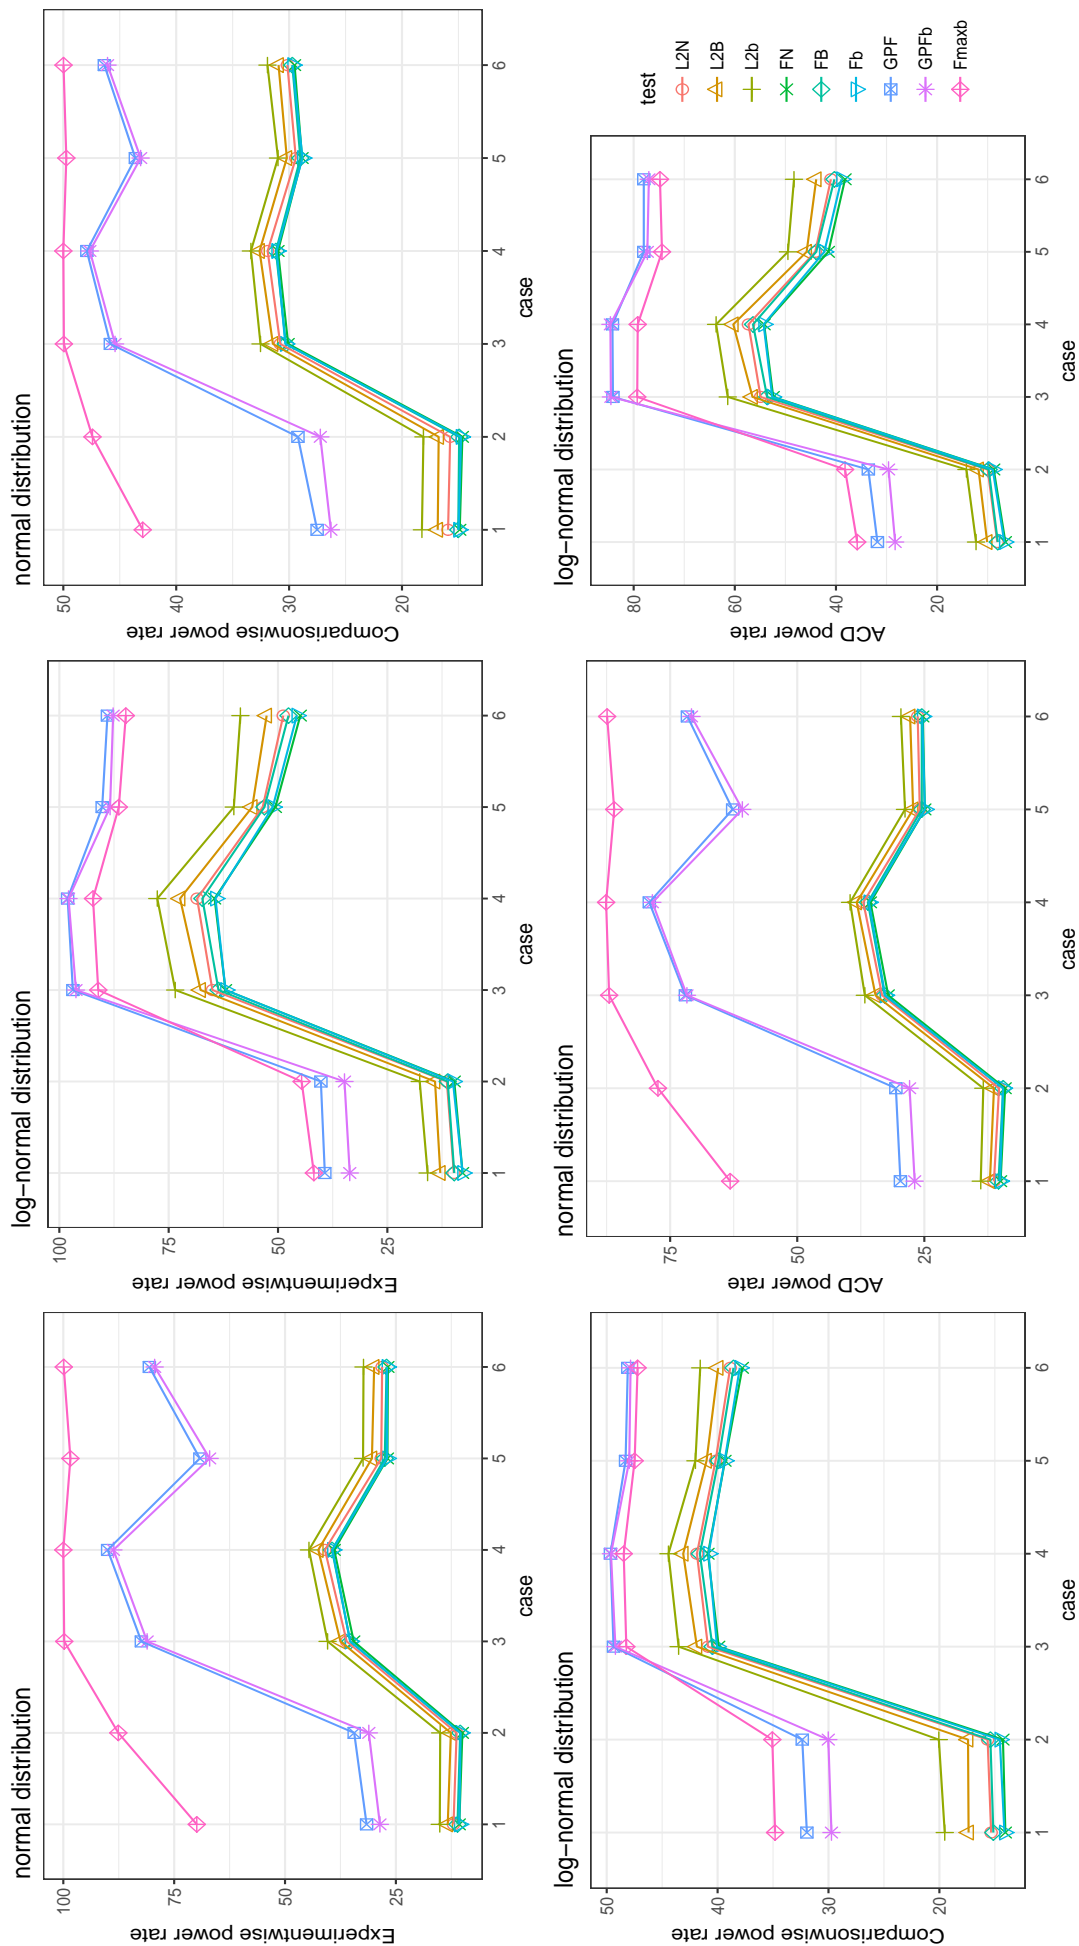

Figure 16: Experimentwise, comparisonwise and ACD power rates (as percentages) of the tests obtained under Model 2 for cases of  $(\mathbf{n}, M)$ : 1.  $(\mathbf{n}_1, 40)$ , 2.  $(\mathbf{n}_1, 80)$ , 3.  $(\mathbf{n}_2, 40)$ , 4.  $(\mathbf{n}_2, 80)$ , 5.  $(\mathbf{n}_3, 40)$ , 6.  $(\mathbf{n}_3, 80)$ , where  $\mathbf{n}_1 = (10, 10, 10, 10)$ ,  $\mathbf{n}_2 = (20, 20, 20, 20)$ ,  $\mathbf{n}_3 = (10, 20, 15, 30)$  ( $nr = 1000$ ,  $nboot = 10,000$ ,  $\alpha = 5\%$ ). See also Table 28.

Table 1: Empirical sizes ( $\delta = 0$ ) and powers ( $\delta \neq 0$ ), as percentages, of the GPF test obtained for  $\mathbf{C}_7$  under Model 3, when the asymptotic null distribution of the test statistic  $\text{GPF}_n$  is approximated by the Welch-Satterthwaite  $\chi^2$ -approximation (WS) and by the Imhof's (1961) method (I) ( $\sigma^2 = 1.5\rho/2$ ,  $\mathbf{n}_1 = (10, 10, 10, 10)$ ,  $\mathbf{n}_3 = (10, 20, 15, 30)$ ,  $nr = 1000$  and  $\alpha = 5\%$ ).

| Distr.         |                |     | $\delta$ |     |     |      |      |      |      |      |      |      |      |      |
|----------------|----------------|-----|----------|-----|-----|------|------|------|------|------|------|------|------|------|
|                |                |     | 0        |     | 0.2 |      | 0.4  |      | 0.6  |      | 0.8  |      | 1    |      |
|                |                |     | WS       | I   | WS  | I    | WS   | I    | WS   | I    | WS   | I    | WS   | I    |
| $N(0, 1)$      | $\mathbf{n}_1$ | 0.1 | 80       | 6.9 | 7.0 | 34.4 | 35.2 | 91.1 | 91.3 | 99.9 | 99.9 | 100  | 100  | 100  |
|                |                |     | 150      | 7.1 | 7.3 | 31.0 | 31.4 | 91.6 | 92.1 | 100  | 100  | 100  | 100  | 100  |
|                |                | 0.5 | 80       | 6.3 | 6.8 | 11.6 | 12.0 | 28.6 | 29.6 | 52.0 | 52.4 | 77.4 | 78.5 | 93.6 |
|                |                |     | 150      | 5.9 | 6.8 | 11.5 | 12.0 | 25.0 | 26.0 | 50.8 | 52.1 | 77.3 | 78.9 | 93.8 |
|                | $\mathbf{n}_3$ | 0.9 | 80       | 5.3 | 6.0 | 7.3  | 7.9  | 11.1 | 12.5 | 19.3 | 20.7 | 30.6 | 32.4 | 47.1 |
|                |                |     | 150      | 4.9 | 5.9 | 6.9  | 7.5  | 10.6 | 12.0 | 18.6 | 19.9 | 31.6 | 32.6 | 45.1 |
|                |                | 0.1 | 80       | 6.8 | 6.8 | 59.2 | 59.5 | 100  | 100  | 100  | 100  | 100  | 100  | 100  |
|                |                |     | 150      | 6.5 | 6.6 | 59.8 | 59.9 | 100  | 100  | 100  | 100  | 100  | 100  | 100  |
|                | $\mathbf{n}_3$ | 0.5 | 80       | 5.9 | 5.9 | 14.7 | 15.3 | 45.6 | 46.4 | 83.9 | 84.6 | 98.1 | 98.5 | 100  |
|                |                |     | 150      | 6.1 | 6.4 | 14.7 | 15.0 | 47.5 | 48.2 | 83.8 | 84.4 | 98.5 | 98.6 | 100  |
|                | $\mathbf{n}_3$ | 0.9 | 80       | 5.2 | 5.6 | 7.5  | 7.9  | 16.1 | 17.0 | 34.5 | 35.2 | 58.6 | 59.4 | 80.8 |
|                |                |     | 150      | 5.1 | 5.4 | 8.4  | 8.6  | 16.6 | 17.5 | 34.3 | 35.6 | 61.3 | 62.7 | 81.6 |
| $t_4/\sqrt{2}$ | $\mathbf{n}_1$ | 0.1 | 80       | 6.3 | 6.5 | 34.2 | 34.7 | 92.0 | 92.3 | 100  | 100  | 100  | 100  | 100  |
|                |                |     | 150      | 6.1 | 6.3 | 36.0 | 36.6 | 90.4 | 90.6 | 98.9 | 98.9 | 99.8 | 99.8 | 99.9 |
|                |                | 0.5 | 80       | 5.7 | 5.7 | 11.1 | 11.4 | 25.8 | 26.5 | 53.7 | 54.5 | 81.1 | 81.2 | 93.8 |
|                |                |     | 150      | 6.1 | 6.6 | 10.9 | 11.4 | 26.5 | 27.1 | 53.5 | 54.6 | 77.8 | 78.1 | 92.8 |
|                | $\mathbf{n}_3$ | 0.9 | 80       | 4.0 | 4.7 | 6.1  | 7.0  | 10.2 | 10.6 | 16.4 | 18.2 | 27.9 | 29.4 | 45.1 |
|                |                |     | 150      | 4.6 | 5.2 | 6.4  | 7.1  | 10.5 | 11.8 | 17.1 | 18.0 | 26.7 | 28.9 | 45.8 |
|                |                | 0.1 | 80       | 3.8 | 3.8 | 61.4 | 61.5 | 99.3 | 99.3 | 99.9 | 99.9 | 99.9 | 99.9 | 99.9 |
|                |                |     | 150      | 4.1 | 4.1 | 64.9 | 65.0 | 99.7 | 99.7 | 100  | 100  | 100  | 100  | 100  |
|                | $\mathbf{n}_3$ | 0.5 | 80       | 4.4 | 4.4 | 14.4 | 14.5 | 48.0 | 48.3 | 83.5 | 83.5 | 97.7 | 97.7 | 99.8 |
|                |                |     | 150      | 4.8 | 5.0 | 15.9 | 16.0 | 50.5 | 50.6 | 85.0 | 85.2 | 98.0 | 98.0 | 99.8 |
|                | $\mathbf{n}_3$ | 0.9 | 80       | 4.8 | 4.9 | 6.9  | 7.2  | 14.4 | 14.9 | 32.2 | 32.9 | 57.0 | 57.8 | 80.5 |
|                |                |     | 150      | 4.2 | 4.4 | 6.6  | 6.9  | 18.1 | 18.2 | 36.6 | 37.4 | 59.5 | 60.3 | 80.5 |

Table 2: Empirical sizes ( $\delta = 0$ ) and powers ( $\delta \neq 0$ ), as percentages, of the GPF and Fmax tests obtained for  $C_7$  under Model 3, when the asymptotic null distribution of the test statistic  $GPF_n$  (resp.  $Fmax_n$ ) is approximated by the Welch-Satterthwaite  $\chi^2$ -approximation (WS) and by the parametric bootstrap method (GPB) (resp. by the parametric bootstrap method (FPB)) ( $\sigma^2 = 1.5\rho/2$ ,  $\mathbf{n}_1 = (10, 10, 10, 10)$ ,  $\mathbf{n}_3 = (10, 20, 15, 30)$ ,  $nr = 1000$ ,  $nboot = 10,000$  and  $\alpha = 5\%$ ).

| Distr.         | $\mathbf{n}$   | $\rho$ | $M$ | $\delta$ |     |      |      |      |      |      |      |      |      |      |      |
|----------------|----------------|--------|-----|----------|-----|------|------|------|------|------|------|------|------|------|------|
|                |                |        |     | 0        |     |      |      | 0.2  |      |      |      | 0.4  |      |      |      |
|                |                |        |     | WS       | GPB | FPB  |      | WS   | GPB  |      |      | WS   | GPB  |      |      |
| $N(0, 1)$      | $\mathbf{n}_1$ | 0.1    | 80  | 6.5      | 6.4 | 10.1 | 32.2 | 32.2 | 32.7 | 92.0 | 92.4 | 100  | 100  | 100  | 100  |
|                |                |        | 150 | 5.7      | 5.9 | 10.6 | 31.9 | 32.9 |      | 92.3 | 92.6 | 100  | 100  | 100  | 100  |
|                |                | 0.5    | 80  | 6.8      | 6.9 | 9.6  | 9.5  | 9.9  |      | 26.1 | 26.9 | 50.9 | 51.6 | 78.2 | 78.6 |
|                |                |        | 150 | 5.6      | 5.8 | 9.4  | 10.8 | 11.3 |      | 24.0 | 25.0 | 52.0 | 53.0 | 78.6 | 79.3 |
|                | $\mathbf{n}_3$ | 0.9    | 80  | 4.5      | 4.8 | 10.0 | 6.4  | 7.3  |      | 10.7 | 11.9 | 16.0 | 17.7 | 28.6 | 30.3 |
|                |                |        | 150 | 4.4      | 4.8 | 11.1 | 6.5  | 7.5  |      | 9.8  | 11.2 | 17.6 | 18.8 | 28.4 | 30.1 |
|                |                | 0.1    | 80  | 5.2      | 5.2 | 6.9  | 62.1 | 62.1 |      | 100  | 100  | 100  | 100  | 100  | 100  |
|                |                |        | 150 | 6.0      | 6.1 | 7.8  | 61.4 | 61.2 |      | 100  | 100  | 100  | 100  | 100  | 100  |
|                |                | 0.5    | 80  | 4.5      | 4.6 | 7.3  | 16.4 | 16.6 |      | 47.6 | 48.0 | 82.3 | 82.3 | 98.3 | 98.3 |
|                |                |        | 150 | 5.3      | 5.1 | 8.0  | 13.7 | 13.8 |      | 50.2 | 50.2 | 86.0 | 86.2 | 97.9 | 98.1 |
|                | $t_4/\sqrt{2}$ | 0.9    | 80  | 4.4      | 4.5 | 6.8  | 7.4  | 8.0  |      | 16.4 | 16.8 | 35.3 | 36.3 | 61.8 | 62.2 |
|                |                |        | 150 | 4.4      | 4.7 | 6.9  | 7.6  | 7.7  |      | 17.8 | 18.3 | 36.4 | 37.5 | 59.3 | 60.3 |
| $t_4/\sqrt{2}$ | $\mathbf{n}_1$ | 0.1    | 80  | 5.4      | 5.4 | 8.4  | 33.6 | 34.5 |      | 89.8 | 90.5 | 99.7 | 99.7 | 100  | 100  |
|                |                |        | 150 | 6.2      | 6.3 | 10.9 | 37.6 | 39.0 |      | 91.3 | 91.7 | 98.9 | 99.0 | 99.9 | 100  |
|                |                | 0.5    | 80  | 5.7      | 6.0 | 11.1 | 10.9 | 11.4 |      | 27.7 | 28.4 | 53.9 | 54.7 | 78.2 | 79.0 |
|                |                |        | 150 | 5.1      | 5.2 | 10.5 | 11.2 | 11.5 |      | 25.8 | 26.5 | 52.7 | 54.2 | 78.9 | 79.5 |
|                | $\mathbf{n}_3$ | 0.9    | 80  | 4.0      | 4.3 | 10.6 | 4.8  | 5.5  |      | 10.6 | 11.1 | 15.8 | 16.9 | 25.8 | 28.2 |
|                |                |        | 150 | 4.8      | 5.2 | 11.2 | 5.5  | 6.6  |      | 7.8  | 8.5  | 17.6 | 19.1 | 27.5 | 28.5 |
|                |                | 0.1    | 80  | 4.2      | 4.1 | 5.7  | 60.4 | 60.5 |      | 99.8 | 99.8 | 100  | 100  | 100  | 100  |
|                |                |        | 150 | 5.7      | 5.8 | 7.6  | 63.4 | 63.1 |      | 99.6 | 99.7 | 99.9 | 99.9 | 100  | 100  |
|                |                | 0.5    | 80  | 4.4      | 4.6 | 7.0  | 16.7 | 16.7 |      | 52.4 | 52.2 | 82.7 | 82.9 | 96.8 | 96.8 |
|                |                |        | 150 | 5.5      | 5.6 | 8.5  | 13.6 | 13.6 |      | 49.7 | 50.0 | 84.8 | 84.9 | 98.6 | 98.6 |
|                |                | 0.9    | 80  | 5.1      | 5.3 | 7.5  | 8.2  | 8.5  |      | 13.8 | 14.0 | 30.2 | 31.8 | 58.3 | 58.8 |
|                |                |        | 150 | 4.4      | 4.2 | 6.6  | 7.7  | 7.8  |      | 16.0 | 16.5 | 36.0 | 36.8 | 59.8 | 60.3 |

Table 3: Empirical sizes (as percentages) of the tests obtained for  $\mathbf{C}_1$  under Model 1 ( $\delta = 0$ ,  $\mathbf{n}_1 = (10, 10, 10, 10)$ ,  $\mathbf{n}_2 = (20, 20, 20, 20)$ ,  $\mathbf{n}_3 = (10, 20, 15, 30)$ ,  $nr = 1000$ ,  $nboot = 10,000$  and  $\alpha = 5\%$ ). See also Figure 1.

| Distr.         | $\mathbf{n}$   | $\rho$ | $M$ | Test             |                  |                  |     |     |     |     |      |       |
|----------------|----------------|--------|-----|------------------|------------------|------------------|-----|-----|-----|-----|------|-------|
|                |                |        |     | L <sup>2</sup> N | L <sup>2</sup> B | L <sup>2</sup> b | FN  | FB  | Fb  | GPF | GPFb | Fmaxb |
| $N(0, 1)$      | $\mathbf{n}_1$ | 0.1    | 80  | 5.4              | 5.8              | 6.6              | 5.0 | 5.0 | 5.1 | 5.2 | 4.8  | 4.7   |
|                |                |        | 150 | 4.0              | 4.8              | 6.0              | 3.1 | 3.1 | 3.0 | 3.9 | 3.3  | 3.3   |
|                |                | 0.5    | 80  | 5.8              | 6.5              | 8.1              | 4.9 | 5.8 | 5.0 | 6.4 | 5.5  | 6.1   |
|                |                |        | 150 | 5.2              | 6.0              | 7.3              | 4.8 | 5.1 | 4.8 | 5.6 | 4.7  | 5.1   |
|                |                | 0.9    | 80  | 3.2              | 4.2              | 5.0              | 2.5 | 3.9 | 2.6 | 3.3 | 2.6  | 4.3   |
|                |                |        | 150 | 3.5              | 4.5              | 5.0              | 3.5 | 4.4 | 3.4 | 4.2 | 3.5  | 3.8   |
|                | $\mathbf{n}_2$ | 0.1    | 80  | 5.8              | 6.3              | 6.4              | 5.5 | 5.5 | 5.5 | 5.8 | 5.4  | 5.7   |
|                |                |        | 150 | 5.4              | 5.7              | 5.9              | 5.2 | 5.2 | 5.3 | 5.4 | 5.1  | 5.0   |
|                |                | 0.5    | 80  | 6.2              | 6.7              | 7.2              | 5.8 | 6.3 | 5.9 | 6.7 | 6.3  | 5.4   |
|                |                |        | 150 | 6.3              | 6.8              | 7.6              | 5.9 | 6.4 | 5.8 | 6.4 | 5.8  | 5.9   |
|                |                | 0.9    | 80  | 4.1              | 4.9              | 5.0              | 3.9 | 4.8 | 3.9 | 4.5 | 4.0  | 4.6   |
|                |                |        | 150 | 4.1              | 5.2              | 5.5              | 4.1 | 4.7 | 4.0 | 4.8 | 4.1  | 5.3   |
|                | $\mathbf{n}_3$ | 0.1    | 80  | 5.2              | 5.5              | 6.1              | 4.4 | 4.4 | 4.5 | 4.8 | 4.3  | 4.9   |
|                |                |        | 150 | 5.0              | 5.2              | 5.5              | 4.8 | 4.8 | 4.7 | 4.9 | 4.8  | 4.8   |
|                |                | 0.5    | 80  | 4.3              | 4.5              | 5.2              | 4.3 | 4.3 | 4.2 | 5.2 | 4.6  | 4.9   |
|                |                |        | 150 | 5.0              | 5.4              | 5.8              | 4.9 | 5.0 | 5.0 | 5.5 | 5.2  | 5.0   |
|                |                | 0.9    | 80  | 4.9              | 5.4              | 6.3              | 4.8 | 5.4 | 4.6 | 5.4 | 4.7  | 6.2   |
|                |                |        | 150 | 4.5              | 5.5              | 6.1              | 4.5 | 5.0 | 4.5 | 5.3 | 4.0  | 4.8   |
| $t_4/\sqrt{2}$ | $\mathbf{n}_1$ | 0.1    | 80  | 5.0              | 5.7              | 6.3              | 4.5 | 4.5 | 4.7 | 5.0 | 4.6  | 4.5   |
|                |                |        | 150 | 5.3              | 5.7              | 6.4              | 4.7 | 4.7 | 4.8 | 5.4 | 5.0  | 5.1   |
|                |                | 0.5    | 80  | 6.2              | 6.9              | 7.7              | 5.4 | 5.8 | 5.6 | 6.8 | 5.7  | 4.6   |
|                |                |        | 150 | 4.8              | 5.2              | 5.7              | 4.4 | 4.8 | 4.5 | 5.3 | 4.5  | 5.6   |
|                |                | 0.9    | 80  | 3.6              | 5.1              | 6.0              | 3.4 | 4.7 | 3.4 | 4.7 | 4.1  | 5.7   |
|                |                |        | 150 | 3.9              | 5.5              | 5.9              | 3.7 | 5.0 | 3.7 | 5.3 | 3.9  | 5.1   |
|                | $\mathbf{n}_2$ | 0.1    | 80  | 5.7              | 5.9              | 6.2              | 5.3 | 5.3 | 5.4 | 5.5 | 5.5  | 5.3   |
|                |                |        | 150 | 5.0              | 5.0              | 5.2              | 4.1 | 4.4 | 4.7 | 4.7 | 4.6  | 5.2   |
|                |                | 0.5    | 80  | 5.4              | 5.8              | 6.3              | 4.8 | 5.3 | 4.9 | 5.5 | 5.3  | 5.8   |
|                |                |        | 150 | 5.4              | 5.7              | 6.4              | 4.8 | 5.3 | 5.2 | 5.6 | 5.3  | 5.1   |
|                |                | 0.9    | 80  | 3.7              | 4.8              | 4.9              | 3.4 | 4.4 | 3.2 | 3.9 | 3.4  | 4.4   |
|                |                |        | 150 | 3.1              | 4.1              | 4.0              | 2.8 | 3.6 | 2.8 | 3.6 | 3.2  | 3.7   |
|                | $\mathbf{n}_3$ | 0.1    | 80  | 6.6              | 6.8              | 7.1              | 6.1 | 6.1 | 6.2 | 6.7 | 6.3  | 5.6   |
|                |                |        | 150 | 4.9              | 5.3              | 5.6              | 4.2 | 4.3 | 4.4 | 5.0 | 4.3  | 4.8   |
|                |                | 0.5    | 80  | 4.8              | 5.0              | 5.1              | 4.7 | 4.9 | 4.6 | 4.9 | 4.5  | 4.6   |
|                |                |        | 150 | 5.0              | 5.6              | 5.8              | 4.9 | 4.9 | 5.0 | 5.4 | 5.0  | 5.4   |
|                |                | 0.9    | 80  | 5.6              | 7.1              | 7.1              | 5.4 | 6.6 | 5.3 | 6.7 | 5.2  | 6.1   |
|                |                |        | 150 | 4.4              | 5.3              | 4.9              | 4.3 | 5.1 | 4.0 | 5.1 | 4.3  | 3.5   |

Table 4: Empirical sizes (as percentages) of the tests obtained for  $\mathbf{C}_7$  under Model 1 ( $\delta = 0$ ,  $\mathbf{n}_1 = (10, 10, 10, 10)$ ,  $\mathbf{n}_2 = (20, 20, 20, 20)$ ,  $\mathbf{n}_3 = (10, 20, 15, 30)$ ,  $nr = 1000$ ,  $nboot = 10,000$  and  $\alpha = 5\%$ ).

| Distr.         | $\mathbf{n}$   | $\rho$ | $M$ | Test             |                  |                  |     |     |     |     |      |       |
|----------------|----------------|--------|-----|------------------|------------------|------------------|-----|-----|-----|-----|------|-------|
|                |                |        |     | L <sup>2</sup> N | L <sup>2</sup> B | L <sup>2</sup> b | FN  | FB  | Fb  | GPF | GPFb | Fmaxb |
| $N(0, 1)$      | $\mathbf{n}_1$ | 0.1    | 80  | 4.9              | 5.5              | 6.6              | 4.1 | 4.1 | 4.1 | 4.7 | 3.9  | 3.7   |
|                |                |        | 150 | 4.6              | 5.1              | 6.0              | 4.2 | 4.2 | 4.2 | 4.7 | 4.3  | 4.4   |
|                |                | 0.5    | 80  | 5.4              | 5.9              | 7.2              | 4.9 | 5.3 | 5.0 | 6.1 | 5.7  | 5.2   |
|                |                |        | 150 | 4.5              | 5.2              | 6.8              | 4.2 | 4.7 | 4.3 | 5.1 | 4.6  | 4.5   |
|                |                | 0.9    | 80  | 3.7              | 5.5              | 6.4              | 3.1 | 5.1 | 3.0 | 4.5 | 3.8  | 4.1   |
|                |                |        | 150 | 2.8              | 4.8              | 6.0              | 2.7 | 4.3 | 2.6 | 3.8 | 3.2  | 4.3   |
|                | $\mathbf{n}_2$ | 0.1    | 80  | 4.5              | 4.7              | 5.1              | 4.4 | 4.5 | 4.5 | 4.5 | 4.4  | 4.3   |
|                |                |        | 150 | 5.1              | 5.1              | 5.6              | 4.9 | 4.9 | 4.9 | 5.0 | 5.0  | 4.6   |
|                |                | 0.5    | 80  | 4.2              | 4.4              | 5.0              | 4.0 | 4.2 | 4.0 | 4.4 | 3.9  | 4.6   |
|                |                |        | 150 | 5.8              | 6.0              | 6.1              | 5.6 | 5.8 | 5.7 | 5.7 | 5.5  | 5.2   |
|                |                | 0.9    | 80  | 3.6              | 5.1              | 5.3              | 3.5 | 4.7 | 3.2 | 4.0 | 3.3  | 4.3   |
|                |                |        | 150 | 3.9              | 4.7              | 5.1              | 3.8 | 4.4 | 3.7 | 4.4 | 4.1  | 3.5   |
|                | $\mathbf{n}_3$ | 0.1    | 80  | 4.7              | 4.8              | 5.1              | 4.6 | 4.6 | 4.7 | 4.8 | 4.7  | 4.9   |
|                |                |        | 150 | 6.1              | 6.4              | 6.6              | 5.3 | 5.5 | 5.4 | 6.2 | 5.6  | 5.9   |
|                |                | 0.5    | 80  | 4.4              | 4.7              | 5.1              | 4.4 | 4.4 | 4.4 | 4.7 | 4.5  | 4.6   |
|                |                |        | 150 | 6.3              | 7.0              | 7.6              | 5.9 | 6.3 | 5.9 | 6.3 | 5.9  | 4.6   |
|                |                | 0.9    | 80  | 4.5              | 6.1              | 6.9              | 4.5 | 6.1 | 4.5 | 5.5 | 4.7  | 4.6   |
|                |                |        | 150 | 5.0              | 5.8              | 6.2              | 4.8 | 5.5 | 4.8 | 5.5 | 4.9  | 4.9   |
| $t_4/\sqrt{2}$ | $\mathbf{n}_1$ | 0.1    | 80  | 5.5              | 6.1              | 6.6              | 4.8 | 4.8 | 5.0 | 5.3 | 4.9  | 4.5   |
|                |                |        | 150 | 5.8              | 6.0              | 6.3              | 5.1 | 5.1 | 5.0 | 5.8 | 5.1  | 4.9   |
|                |                | 0.5    | 80  | 5.7              | 6.3              | 7.4              | 5.4 | 5.7 | 5.3 | 6.4 | 5.1  | 4.9   |
|                |                |        | 150 | 4.0              | 4.8              | 6.4              | 3.6 | 4.0 | 3.9 | 5.0 | 4.4  | 4.7   |
|                |                | 0.9    | 80  | 4.2              | 5.8              | 6.5              | 3.9 | 5.4 | 4.0 | 5.4 | 4.0  | 5.4   |
|                |                |        | 150 | 3.6              | 6.5              | 6.7              | 3.5 | 5.7 | 3.7 | 5.4 | 4.3  | 5.0   |
|                | $\mathbf{n}_2$ | 0.1    | 80  | 5.9              | 6.3              | 6.9              | 5.7 | 5.7 | 5.7 | 5.9 | 5.5  | 5.4   |
|                |                |        | 150 | 5.3              | 5.5              | 6.2              | 5.0 | 5.1 | 5.1 | 5.2 | 5.0  | 5.5   |
|                |                | 0.5    | 80  | 4.4              | 4.6              | 5.0              | 4.1 | 4.4 | 4.0 | 4.7 | 4.2  | 5.2   |
|                |                |        | 150 | 4.8              | 5.0              | 5.5              | 4.6 | 4.8 | 4.7 | 5.0 | 4.7  | 5.2   |
|                |                | 0.9    | 80  | 4.1              | 4.9              | 5.1              | 3.9 | 4.6 | 4.0 | 4.7 | 4.3  | 5.1   |
|                |                |        | 150 | 4.1              | 5.0              | 5.3              | 3.9 | 5.0 | 3.9 | 4.7 | 4.2  | 4.7   |
|                | $\mathbf{n}_3$ | 0.1    | 80  | 4.4              | 4.7              | 5.2              | 4.2 | 4.2 | 4.2 | 4.4 | 4.3  | 4.1   |
|                |                |        | 150 | 6.1              | 6.2              | 6.4              | 5.6 | 5.6 | 5.6 | 5.8 | 5.6  | 5.8   |
|                |                | 0.5    | 80  | 5.1              | 5.7              | 6.3              | 4.7 | 5.1 | 4.9 | 5.5 | 5.2  | 4.6   |
|                |                |        | 150 | 5.1              | 5.5              | 6.0              | 4.9 | 5.1 | 5.0 | 5.1 | 5.1  | 4.4   |
|                |                | 0.9    | 80  | 3.7              | 4.5              | 4.8              | 3.5 | 4.4 | 3.5 | 4.2 | 3.7  | 4.2   |
|                |                |        | 150 | 4.1              | 5.2              | 5.4              | 4.0 | 4.8 | 4.2 | 5.5 | 4.5  | 5.3   |



Table 5: Empirical sizes (as percentages) of the tests obtained under Model 2 versus different coefficient matrices  $\mathbf{C}$  ( $\mathbf{C}_1, \mathbf{C}_7$ ). In the column Case, “N” and “LN” refer to the normal and log-normal case, respectively. Moreover  $\mathbf{n}_1 = (10, 10, 10, 10)$ ,  $\mathbf{n}_2 = (20, 20, 20, 20)$ ,  $\mathbf{n}_3 = (10, 20, 15, 30)$ ,  $nr = 1000$ ,  $nboot = 10,000$  and  $\alpha = 5\%$ . See also Figure 2.

| $\mathbf{C}$   | Case | $\mathbf{n}$   | $M$ | Test             |                  |                  |     |     |     |     |      |       |
|----------------|------|----------------|-----|------------------|------------------|------------------|-----|-----|-----|-----|------|-------|
|                |      |                |     | L <sup>2</sup> N | L <sup>2</sup> B | L <sup>2</sup> b | FN  | FB  | Fb  | GPF | GPFb | Fmaxb |
| $\mathbf{C}_1$ | N    | $\mathbf{n}_1$ | 40  | 5.7              | 6.6              | 7.5              | 4.8 | 5.2 | 4.9 | 6.1 | 5.8  | 5.0   |
|                |      |                | 80  | 4.4              | 5.4              | 6.1              | 3.9 | 4.1 | 4.0 | 4.7 | 3.8  | 4.5   |
|                |      | $\mathbf{n}_2$ | 40  | 5.4              | 6.0              | 6.1              | 5.0 | 5.1 | 5.2 | 5.4 | 5.1  | 5.8   |
|                |      |                | 80  | 4.9              | 5.0              | 5.2              | 4.6 | 4.7 | 4.7 | 4.9 | 4.7  | 4.3   |
|                |      | $\mathbf{n}_3$ | 40  | 5.6              | 5.8              | 6.1              | 5.0 | 5.2 | 5.1 | 5.3 | 5.1  | 6.3   |
|                |      |                | 80  | 4.9              | 5.1              | 5.3              | 4.7 | 4.7 | 4.7 | 4.4 | 4.4  | 4.6   |
|                | LN   | $\mathbf{n}_1$ | 40  | 5.2              | 6.3              | 7.3              | 4.5 | 5.1 | 4.6 | 4.8 | 4.0  | 4.0   |
|                |      |                | 80  | 6.3              | 6.5              | 8.0              | 5.9 | 6.0 | 5.8 | 6.3 | 5.8  | 5.1   |
|                |      | $\mathbf{n}_2$ | 40  | 4.8              | 5.0              | 5.6              | 4.4 | 4.8 | 4.6 | 5.5 | 5.5  | 5.8   |
|                |      |                | 80  | 5.4              | 6.0              | 6.4              | 5.2 | 5.4 | 5.2 | 5.3 | 5.3  | 5.4   |
|                |      | $\mathbf{n}_3$ | 40  | 5.4              | 5.8              | 6.2              | 4.7 | 5.3 | 4.9 | 5.6 | 5.3  | 5.6   |
|                |      |                | 80  | 5.3              | 5.5              | 6.0              | 5.2 | 5.3 | 5.2 | 5.4 | 5.0  | 4.7   |
| $\mathbf{C}_7$ | N    | $\mathbf{n}_1$ | 40  | 5.9              | 6.1              | 7.2              | 5.4 | 5.5 | 5.5 | 6.1 | 5.6  | 5.1   |
|                |      |                | 80  | 5.0              | 5.6              | 6.6              | 4.4 | 4.5 | 4.5 | 5.4 | 5.0  | 4.3   |
|                |      | $\mathbf{n}_2$ | 40  | 4.9              | 5.5              | 5.9              | 4.7 | 4.7 | 4.7 | 5.4 | 5.1  | 5.6   |
|                |      |                | 80  | 5.7              | 6.3              | 6.9              | 5.4 | 5.4 | 5.4 | 5.3 | 4.9  | 5.6   |
|                |      | $\mathbf{n}_3$ | 40  | 6.2              | 6.3              | 6.9              | 5.4 | 5.6 | 5.8 | 6.6 | 6.4  | 3.9   |
|                |      |                | 80  | 4.9              | 5.2              | 5.5              | 4.8 | 4.9 | 4.8 | 4.8 | 4.6  | 4.5   |
|                | LN   | $\mathbf{n}_1$ | 40  | 6.0              | 6.7              | 7.4              | 5.1 | 5.6 | 5.2 | 5.4 | 4.6  | 5.8   |
|                |      |                | 80  | 5.7              | 6.4              | 7.1              | 5.3 | 5.7 | 5.4 | 5.8 | 4.7  | 4.5   |
|                |      | $\mathbf{n}_2$ | 40  | 4.8              | 5.1              | 5.4              | 4.5 | 4.8 | 4.9 | 5.2 | 5.0  | 5.3   |
|                |      |                | 80  | 7.4              | 7.8              | 8.3              | 7.1 | 7.2 | 7.2 | 6.8 | 6.6  | 5.6   |
|                |      | $\mathbf{n}_3$ | 40  | 6.2              | 6.4              | 6.6              | 6.0 | 6.2 | 6.1 | 6.2 | 5.9  | 6.4   |
|                |      |                | 80  | 5.1              | 5.2              | 6.0              | 4.9 | 5.0 | 4.9 | 5.6 | 5.3  | 5.1   |

Table 6: Empirical powers (as percentages) of the tests obtained for  $\mathbf{C}_2$  under Model 1 and standard normal distribution ( $M = 80$ ,  $\delta \neq 0$ ,  $\mathbf{n}_1 = (10, 10, 10, 10)$ ,  $\mathbf{n}_3 = (10, 20, 15, 30)$ ,  $nr = 1000$ ,  $nboot = 10,000$  and  $\alpha = 5\%$ ). For  $M = 150$ , the results were very similar, and, therefore, they are omitted. See also Figure 3.

| $\mathbf{n}$   | $\rho$ | $\delta$ | Test             |                  |                  |      |      |      |      |      |       |
|----------------|--------|----------|------------------|------------------|------------------|------|------|------|------|------|-------|
|                |        |          | L <sup>2</sup> N | L <sup>2</sup> B | L <sup>2</sup> b | FN   | FB   | Fb   | GPF  | GPFb | Fmaxb |
| $\mathbf{n}_1$ | 0.1    | 0.2      | 55.6             | 58.0             | 60.3             | 52.5 | 52.7 | 52.7 | 55.6 | 52.6 | 96.2  |
|                |        | 0.4      | 99.7             | 99.7             | 99.8             | 99.5 | 99.5 | 99.5 | 99.5 | 99.5 | 100   |
|                |        | 0.6      | 100              | 100              | 100              | 100  | 100  | 100  | 100  | 100  | 100   |
|                |        | 0.8      | 100              | 100              | 100              | 100  | 100  | 100  | 100  | 100  | 100   |
|                |        | 1.0      | 100              | 100              | 100              | 100  | 100  | 100  | 100  | 100  | 100   |
|                | 0.5    | 0.2      | 11.4             | 12.8             | 15.3             | 10.5 | 11.7 | 10.6 | 12.7 | 11.7 | 13.5  |
|                |        | 0.4      | 39.4             | 42.3             | 46.7             | 37.0 | 39.2 | 37.2 | 42.6 | 39.3 | 54.4  |
|                |        | 0.6      | 75.2             | 77.4             | 79.6             | 73.9 | 75.2 | 73.9 | 78.3 | 75.9 | 92.1  |
|                |        | 0.8      | 95.6             | 96.1             | 97.0             | 95.0 | 95.6 | 95.2 | 95.9 | 95.4 | 99.9  |
|                |        | 1.0      | 99.6             | 99.8             | 99.8             | 99.5 | 99.6 | 99.5 | 99.5 | 99.4 | 100   |
|                | 0.9    | 0.2      | 5.4              | 7.7              | 9.2              | 4.9  | 6.9  | 4.9  | 6.3  | 5.4  | 7.1   |
|                |        | 0.4      | 11.9             | 15.4             | 17.7             | 11.3 | 15.0 | 11.0 | 13.6 | 11.8 | 10.7  |
|                |        | 0.6      | 29.1             | 36.2             | 39.2             | 27.4 | 34.0 | 27.6 | 31.0 | 26.9 | 20.6  |
|                |        | 0.8      | 47.5             | 54.2             | 56.9             | 45.8 | 52.0 | 45.6 | 50.0 | 46.1 | 35.0  |
|                |        | 1.0      | 69.8             | 75.2             | 77.2             | 68.8 | 73.7 | 68.6 | 70.8 | 68.0 | 54.8  |
| $\mathbf{n}_3$ | 0.1    | 0.2      | 59.3             | 60.8             | 62.5             | 58.1 | 58.2 | 58.0 | 60.0 | 58.8 | 98.4  |
|                |        | 0.4      | 100              | 100              | 100              | 100  | 100  | 100  | 100  | 100  | 100   |
|                |        | 0.6      | 100              | 100              | 100              | 100  | 100  | 100  | 100  | 100  | 100   |
|                |        | 0.8      | 100              | 100              | 100              | 100  | 100  | 100  | 100  | 100  | 100   |
|                |        | 1.0      | 100              | 100              | 100              | 100  | 100  | 100  | 100  | 100  | 100   |
|                | 0.5    | 0.2      | 15.1             | 16.2             | 17.0             | 14.1 | 15.0 | 14.7 | 16.0 | 15.2 | 18.5  |
|                |        | 0.4      | 47.8             | 49.8             | 51.5             | 47.1 | 47.8 | 47.4 | 49.5 | 48.1 | 67.4  |
|                |        | 0.6      | 84.4             | 85.2             | 86.3             | 83.8 | 84.3 | 83.8 | 85.7 | 84.0 | 97.4  |
|                |        | 0.8      | 97.8             | 97.9             | 98.1             | 97.7 | 97.8 | 97.8 | 98.3 | 98.0 | 100   |
|                |        | 1.0      | 100              | 100              | 100              | 100  | 100  | 100  | 100  | 100  | 100   |
|                | 0.9    | 0.2      | 6.8              | 8.0              | 8.6              | 6.5  | 7.8  | 6.4  | 7.2  | 5.9  | 6.8   |
|                |        | 0.4      | 15.3             | 18.2             | 18.9             | 14.6 | 17.3 | 14.7 | 16.4 | 14.7 | 12.4  |
|                |        | 0.6      | 33.7             | 36.8             | 38.2             | 33.1 | 35.9 | 32.9 | 35.7 | 33.1 | 25.0  |
|                |        | 0.8      | 58.9             | 62.3             | 63.3             | 58.1 | 61.5 | 57.8 | 59.6 | 56.8 | 45.6  |
|                |        | 1.0      | 82.2             | 84.6             | 85.7             | 81.4 | 84.1 | 81.2 | 83.2 | 82.2 | 68.4  |

Table 7: Empirical powers (as percentages) of the tests obtained for  $\mathbf{C}_2$  under Model 1 and  $t$ -distribution  $t_4/\sqrt{2}$  ( $M = 80$ ,  $\delta \neq 0$ ,  $\mathbf{n}_1 = (10, 10, 10, 10)$ ,  $\mathbf{n}_3 = (10, 20, 15, 30)$ ,  $nr = 1000$ ,  $nboot = 10,000$  and  $\alpha = 5\%$ ). For  $M = 150$ , the results were very similar, and, therefore, they are omitted. See also Figure 3.

| n              | $\rho$ | $\delta$ | Test             |                  |                  |      |      |      |      |      |       |
|----------------|--------|----------|------------------|------------------|------------------|------|------|------|------|------|-------|
|                |        |          | L <sup>2</sup> N | L <sup>2</sup> B | L <sup>2</sup> b | FN   | FB   | Fb   | GPF  | GPFb | Fmaxb |
| n <sub>1</sub> | 0.1    | 0.2      | 57.7             | 59.3             | 61.5             | 54.3 | 54.7 | 55.7 | 57.9 | 55.9 | 93.8  |
|                |        | 0.4      | 99.1             | 99.1             | 99.2             | 98.9 | 98.9 | 98.9 | 98.9 | 98.8 | 100   |
|                |        | 0.6      | 99.7             | 99.8             | 99.7             | 99.7 | 99.7 | 99.7 | 99.7 | 99.7 | 100   |
|                |        | 0.8      | 100              | 100              | 100              | 100  | 100  | 100  | 100  | 100  | 100   |
|                |        | 1.0      | 100              | 100              | 100              | 100  | 100  | 100  | 100  | 100  | 100   |
|                | 0.5    | 0.2      | 12.7             | 13.7             | 15.0             | 11.5 | 12.8 | 11.9 | 12.9 | 11.7 | 15.9  |
|                |        | 0.4      | 41.7             | 44.4             | 47.5             | 39.8 | 41.5 | 40.7 | 44.0 | 41.7 | 55.9  |
|                |        | 0.6      | 76.1             | 77.4             | 79.5             | 75.1 | 75.9 | 75.7 | 78.1 | 76.6 | 92.1  |
|                |        | 0.8      | 93.3             | 93.9             | 94.2             | 92.5 | 92.9 | 93.0 | 94.2 | 93.9 | 99.4  |
|                |        | 1.0      | 98.5             | 98.5             | 98.8             | 98.2 | 98.4 | 98.5 | 98.7 | 98.7 | 100   |
|                | 0.9    | 0.2      | 4.4              | 6.1              | 7.0              | 3.7  | 5.4  | 3.7  | 4.9  | 3.7  | 5.0   |
|                |        | 0.4      | 13.4             | 17.0             | 18.0             | 12.5 | 15.6 | 12.6 | 15.4 | 13.5 | 12.7  |
|                |        | 0.6      | 25.8             | 32.3             | 33.9             | 24.9 | 30.9 | 24.8 | 28.7 | 25.9 | 22.6  |
|                |        | 0.8      | 46.4             | 52.7             | 54.8             | 45.7 | 50.9 | 45.7 | 50.7 | 46.3 | 39.2  |
|                |        | 1.0      | 68.0             | 72.8             | 73.6             | 67.0 | 70.9 | 66.7 | 70.9 | 67.8 | 57.6  |
| n <sub>3</sub> | 0.1    | 0.2      | 63.6             | 64.2             | 65.1             | 62.1 | 62.3 | 62.4 | 63.1 | 62.3 | 97.9  |
|                |        | 0.4      | 99.5             | 99.6             | 99.6             | 99.5 | 99.5 | 99.5 | 99.5 | 99.5 | 99.9  |
|                |        | 0.6      | 99.9             | 100              | 99.9             | 99.9 | 99.9 | 99.9 | 99.9 | 99.9 | 100   |
|                |        | 0.8      | 99.9             | 99.9             | 99.9             | 99.9 | 99.9 | 99.9 | 99.9 | 99.9 | 100   |
|                |        | 1.0      | 100              | 100              | 100              | 100  | 100  | 100  | 100  | 100  | 100   |
|                | 0.5    | 0.2      | 15.6             | 16.8             | 16.7             | 15.2 | 15.5 | 15.0 | 16.1 | 14.8 | 18.0  |
|                |        | 0.4      | 49.4             | 50.6             | 51.4             | 48.7 | 49.5 | 48.8 | 50.9 | 49.0 | 68.0  |
|                |        | 0.6      | 84.1             | 84.9             | 85.6             | 83.1 | 83.9 | 82.8 | 85.6 | 84.6 | 97.7  |
|                |        | 0.8      | 97.8             | 97.9             | 97.8             | 97.6 | 97.6 | 97.6 | 97.8 | 97.6 | 99.9  |
|                |        | 1.0      | 99.8             | 99.8             | 99.8             | 99.8 | 99.8 | 99.8 | 99.8 | 99.8 | 100   |
|                | 0.9    | 0.2      | 7.3              | 8.3              | 8.1              | 7.2  | 8.1  | 6.7  | 7.4  | 6.6  | 6.3   |
|                |        | 0.4      | 15.8             | 17.4             | 17.5             | 15.3 | 17.1 | 14.6 | 16.7 | 14.9 | 13.6  |
|                |        | 0.6      | 33.0             | 36.2             | 35.7             | 32.7 | 35.6 | 31.5 | 34.6 | 31.6 | 25.9  |
|                |        | 0.8      | 56.8             | 60.3             | 59.8             | 56.0 | 58.8 | 54.8 | 59.1 | 55.7 | 47.9  |
|                |        | 1.0      | 81.8             | 83.6             | 83.6             | 81.0 | 83.3 | 79.9 | 81.8 | 80.0 | 69.2  |

Table 8: Empirical powers (as percentages) of the tests obtained for  $\mathbf{C}_7$  under Model 1 and standard normal distribution ( $M = 80$ ,  $\delta \neq 0$ ,  $\mathbf{n}_1 = (10, 10, 10, 10)$ ,  $\mathbf{n}_3 = (10, 20, 15, 30)$ ,  $nr = 1000$ ,  $nboot = 10,000$  and  $\alpha = 5\%$ ). For  $M = 150$ , the results were very similar, and, therefore, they are omitted. See also Figure 4.

| n              | $\rho$ | $\delta$ | Test             |                  |                  |      |      |      |      |      |       |
|----------------|--------|----------|------------------|------------------|------------------|------|------|------|------|------|-------|
|                |        |          | L <sup>2</sup> N | L <sup>2</sup> B | L <sup>2</sup> b | FN   | FB   | Fb   | GPF  | GPFb | Fmaxb |
| n <sub>1</sub> | 0.1    | 0.2      | 34.6             | 35.8             | 38.9             | 32.5 | 32.8 | 32.9 | 34.7 | 32.6 | 77.9  |
|                |        | 0.4      | 91.5             | 93.2             | 94.1             | 89.5 | 89.6 | 89.8 | 91.2 | 90.0 | 100   |
|                |        | 0.6      | 100              | 100              | 100              | 100  | 100  | 100  | 100  | 100  | 100   |
|                |        | 0.8      | 100              | 100              | 100              | 100  | 100  | 100  | 100  | 100  | 100   |
|                |        | 1.0      | 100              | 100              | 100              | 100  | 100  | 100  | 100  | 100  | 100   |
|                | 0.5    | 0.2      | 9.1              | 10.1             | 11.5             | 8.1  | 9.1  | 8.7  | 9.4  | 8.5  | 8.1   |
|                |        | 0.4      | 25.0             | 26.6             | 28.8             | 23.7 | 24.9 | 23.9 | 26.9 | 24.5 | 31.3  |
|                |        | 0.6      | 47.7             | 50.8             | 54.5             | 46.6 | 47.9 | 46.7 | 49.9 | 47.8 | 67.4  |
|                |        | 0.8      | 75.7             | 78.0             | 79.7             | 73.5 | 75.8 | 74.4 | 77.1 | 75.0 | 92.4  |
|                |        | 1.0      | 92.1             | 92.7             | 93.8             | 91.3 | 92.1 | 91.5 | 93.7 | 92.7 | 99.4  |
|                | 0.9    | 0.2      | 4.7              | 7.1              | 7.9              | 4.5  | 6.3  | 4.4  | 6.1  | 4.3  | 5.5   |
|                |        | 0.4      | 8.6              | 11.6             | 13.7             | 7.9  | 10.4 | 7.8  | 10.0 | 8.5  | 9.4   |
|                |        | 0.6      | 16.2             | 20.9             | 23.1             | 15.3 | 19.9 | 14.7 | 19.2 | 15.6 | 12.7  |
|                |        | 0.8      | 26.4             | 31.7             | 33.7             | 24.5 | 30.0 | 24.4 | 28.3 | 25.6 | 21.3  |
|                |        | 1.0      | 44.3             | 51.2             | 54.4             | 42.6 | 49.3 | 42.1 | 46.8 | 42.3 | 34.8  |
| n <sub>3</sub> | 0.1    | 0.2      | 59.5             | 60.8             | 61.9             | 57.7 | 57.8 | 58.2 | 59.6 | 57.8 | 98.9  |
|                |        | 0.4      | 100              | 100              | 100              | 100  | 100  | 100  | 100  | 100  | 100   |
|                |        | 0.6      | 100              | 100              | 100              | 100  | 100  | 100  | 100  | 100  | 100   |
|                |        | 0.8      | 100              | 100              | 100              | 100  | 100  | 100  | 100  | 100  | 100   |
|                |        | 1.0      | 100              | 100              | 100              | 100  | 100  | 100  | 100  | 100  | 100   |
|                | 0.5    | 0.2      | 15.3             | 16.2             | 17.5             | 14.7 | 15.2 | 14.9 | 16.3 | 15.1 | 19.3  |
|                |        | 0.4      | 47.2             | 48.9             | 50.1             | 46.6 | 47.2 | 46.7 | 49.3 | 47.5 | 68.6  |
|                |        | 0.6      | 80.7             | 81.4             | 82.7             | 80.3 | 80.6 | 80.2 | 82.3 | 81.5 | 96.7  |
|                |        | 0.8      | 97.8             | 97.9             | 98.1             | 97.6 | 97.7 | 97.7 | 98.3 | 98.1 | 100   |
|                |        | 1.0      | 100              | 100              | 100              | 100  | 100  | 100  | 100  | 100  | 100   |
|                | 0.9    | 0.2      | 5.3              | 6.9              | 7.5              | 5.0  | 6.5  | 5.0  | 6.4  | 5.9  | 7.3   |
|                |        | 0.4      | 14.8             | 17.3             | 18.1             | 14.5 | 16.4 | 14.5 | 16.2 | 15.0 | 12.2  |
|                |        | 0.6      | 32.7             | 35.1             | 35.9             | 32.2 | 34.4 | 32.2 | 33.4 | 31.9 | 24.3  |
|                |        | 0.8      | 57.3             | 60.6             | 61.9             | 56.4 | 59.8 | 56.0 | 59.7 | 57.4 | 42.7  |
|                |        | 1.0      | 80.8             | 82.5             | 83.2             | 80.2 | 82.0 | 80.3 | 81.5 | 79.9 | 67.1  |

Table 9: Empirical powers (as percentages) of the tests obtained for  $\mathbf{C}_7$  under Model 1 and  $t$ -distribution  $t_4/\sqrt{2}$  ( $M = 80$ ,  $\delta \neq 0$ ,  $\mathbf{n}_1 = (10, 10, 10, 10)$ ,  $\mathbf{n}_3 = (10, 20, 15, 30)$ ,  $nr = 1000$ ,  $nboot = 10,000$  and  $\alpha = 5\%$ ). For  $M = 150$ , the results were very similar, and, therefore, they are omitted. See also Figure 4.

| $\mathbf{n}$   | $\rho$ | $\delta$ | Test             |                  |                  |      |      |      |      |      |       |
|----------------|--------|----------|------------------|------------------|------------------|------|------|------|------|------|-------|
|                |        |          | L <sup>2</sup> N | L <sup>2</sup> B | L <sup>2</sup> b | FN   | FB   | Fb   | GPF  | GPFb | Fmaxb |
| $\mathbf{n}_1$ | 0.1    | 0.2      | 37.4             | 39.3             | 41.4             | 34.4 | 35.1 | 35.3 | 37.2 | 35.7 | 79.4  |
|                |        | 0.4      | 90.6             | 91.4             | 92.6             | 89.6 | 89.6 | 89.9 | 90.4 | 90.1 | 99.6  |
|                |        | 0.6      | 99.5             | 99.5             | 99.5             | 99.3 | 99.3 | 99.4 | 99.5 | 99.5 | 100   |
|                |        | 0.8      | 99.7             | 99.7             | 99.7             | 99.7 | 99.7 | 99.7 | 99.7 | 99.7 | 100   |
|                |        | 1.0      | 100              | 100              | 100              | 100  | 100  | 100  | 100  | 100  | 100   |
|                | 0.5    | 0.2      | 10.1             | 11.4             | 12.8             | 9.0  | 10.0 | 9.5  | 11.5 | 10.2 | 11.8  |
|                |        | 0.4      | 25.3             | 27.3             | 30.1             | 23.5 | 25.5 | 23.8 | 26.5 | 24.4 | 33.6  |
|                |        | 0.6      | 50.0             | 52.1             | 54.8             | 48.4 | 49.9 | 48.7 | 51.6 | 49.5 | 71.4  |
|                |        | 0.8      | 76.6             | 78.1             | 79.9             | 75.1 | 76.1 | 76.2 | 78.6 | 76.8 | 92.5  |
|                |        | 1.0      | 90.8             | 92.1             | 93.3             | 90.5 | 90.7 | 90.9 | 92.6 | 91.6 | 98.3  |
|                | 0.9    | 0.2      | 4.9              | 7.1              | 7.6              | 4.6  | 6.6  | 4.6  | 6.5  | 5.3  | 5.1   |
|                |        | 0.4      | 8.1              | 11.3             | 13.0             | 7.4  | 10.7 | 7.5  | 10.8 | 8.7  | 8.8   |
|                |        | 0.6      | 13.9             | 18.2             | 19.2             | 13.0 | 16.6 | 12.9 | 16.9 | 13.5 | 12.7  |
|                |        | 0.8      | 26.9             | 33.1             | 35.4             | 25.7 | 30.6 | 25.5 | 30.9 | 27.0 | 21.4  |
|                |        | 1.0      | 40.4             | 47.4             | 48.9             | 38.5 | 45.5 | 38.1 | 44.2 | 40.8 | 33.6  |
| $\mathbf{n}_3$ | 0.1    | 0.2      | 60.4             | 61.5             | 62.8             | 59.0 | 59.3 | 59.6 | 60.8 | 60.0 | 97.8  |
|                |        | 0.4      | 99.3             | 99.4             | 99.5             | 99.2 | 99.2 | 99.4 | 99.4 | 99.4 | 100   |
|                |        | 0.6      | 100              | 100              | 100              | 100  | 100  | 100  | 100  | 100  | 100   |
|                |        | 0.8      | 100              | 100              | 100              | 100  | 100  | 100  | 100  | 100  | 100   |
|                |        | 1.0      | 100              | 100              | 100              | 100  | 100  | 100  | 100  | 100  | 100   |
|                | 0.5    | 0.2      | 16.3             | 17.1             | 17.7             | 15.4 | 16.2 | 15.7 | 17.7 | 17.2 | 21.4  |
|                |        | 0.4      | 48.1             | 48.9             | 50.2             | 46.8 | 48.2 | 47.5 | 49.9 | 48.9 | 66.2  |
|                |        | 0.6      | 82.1             | 82.9             | 83.6             | 81.1 | 81.9 | 81.9 | 83.6 | 82.9 | 95.9  |
|                |        | 0.8      | 98.1             | 98.3             | 98.3             | 98.1 | 98.1 | 98.1 | 98.4 | 98.4 | 99.9  |
|                |        | 1.0      | 99.2             | 99.3             | 99.3             | 99.2 | 99.2 | 99.2 | 99.4 | 99.4 | 99.9  |
|                | 0.9    | 0.2      | 8.0              | 9.1              | 9.1              | 7.8  | 8.6  | 7.7  | 8.5  | 7.8  | 6.4   |
|                |        | 0.4      | 14.8             | 17.3             | 17.4             | 14.6 | 16.6 | 14.4 | 16.1 | 14.4 | 14.1  |
|                |        | 0.6      | 30.8             | 34.9             | 35.4             | 30.3 | 33.8 | 30.0 | 33.1 | 31.2 | 25.4  |
|                |        | 0.8      | 57.2             | 60.2             | 60.6             | 56.7 | 59.4 | 56.9 | 58.5 | 56.7 | 47.8  |
|                |        | 1.0      | 81.4             | 83.1             | 83.4             | 80.7 | 82.7 | 81.0 | 82.4 | 81.6 | 68.4  |

Table 10: Empirical powers (as percentages) of the tests obtained under Model 2 versus different coefficient matrices  $\mathbf{C}$  ( $\mathbf{C}_3, \mathbf{C}_7$ ). In the column Case, “N” and “LN” refer to the normal and log-normal case, respectively. Moreover  $\mathbf{n}_1 = (10, 10, 10, 10)$ ,  $\mathbf{n}_2 = (20, 20, 20, 20)$ ,  $\mathbf{n}_3 = (10, 20, 15, 30)$ ,  $nr = 1000$ ,  $nboot = 10,000$  and  $\alpha = 5\%$ . See also Figure 5.

| $\mathbf{C}$   | Case | $\mathbf{n}$   | $M$ | Test             |                  |                  |      |      |      |      |      |       |
|----------------|------|----------------|-----|------------------|------------------|------------------|------|------|------|------|------|-------|
|                |      |                |     | L <sup>2</sup> N | L <sup>2</sup> B | L <sup>2</sup> b | FN   | FB   | Fb   | GPF  | GPFb | Fmaxb |
| $\mathbf{C}_3$ | N    | $\mathbf{n}_1$ | 40  | 31.4             | 33.1             | 35.9             | 29.4 | 29.8 | 29.5 | 54.3 | 52.0 | 85.0  |
|                |      |                | 80  | 30.7             | 32.9             | 35.2             | 28.7 | 29.4 | 29.1 | 57.7 | 53.3 | 94.5  |
|                |      | $\mathbf{n}_2$ | 40  | 63.3             | 64.3             | 66.3             | 62.5 | 62.7 | 62.7 | 92.3 | 91.4 | 99.9  |
|                |      |                | 80  | 63.7             | 64.9             | 66.8             | 62.0 | 62.2 | 62.3 | 95.9 | 95.5 | 100   |
|                |      | $\mathbf{n}_3$ | 40  | 44.8             | 46.6             | 48.7             | 43.9 | 44.1 | 43.6 | 76.0 | 74.9 | 98.6  |
|                |      |                | 80  | 44.4             | 46.0             | 48.2             | 43.1 | 43.4 | 43.6 | 83.5 | 82.6 | 99.9  |
|                | LN   | $\mathbf{n}_1$ | 40  | 29.5             | 34.2             | 38.8             | 26.2 | 29.1 | 26.6 | 63.0 | 58.0 | 68.3  |
|                |      |                | 80  | 30.1             | 33.2             | 38.8             | 27.2 | 29.6 | 27.9 | 65.7 | 60.9 | 69.9  |
|                |      | $\mathbf{n}_2$ | 40  | 81.0             | 83.4             | 86.9             | 79.7 | 80.3 | 80.0 | 99.0 | 98.6 | 96.9  |
|                |      |                | 80  | 83.9             | 86.2             | 88.2             | 82.3 | 83.1 | 82.1 | 99.6 | 99.6 | 97.1  |
|                |      | $\mathbf{n}_3$ | 40  | 58.5             | 60.6             | 63.9             | 55.8 | 58.0 | 56.5 | 90.9 | 89.3 | 89.2  |
|                |      |                | 80  | 55.1             | 58.6             | 63.9             | 52.0 | 54.3 | 53.3 | 89.6 | 88.3 | 88.4  |
| $\mathbf{C}_7$ | N    | $\mathbf{n}_1$ | 40  | 21.3             | 22.7             | 24.5             | 19.6 | 19.8 | 19.8 | 32.6 | 30.2 | 55.5  |
|                |      |                | 80  | 21.5             | 22.4             | 23.5             | 19.5 | 19.9 | 19.9 | 35.7 | 33.5 | 74.8  |
|                |      | $\mathbf{n}_2$ | 40  | 35.9             | 36.9             | 38.3             | 34.7 | 35.0 | 34.8 | 63.1 | 61.5 | 93.3  |
|                |      |                | 80  | 36.7             | 37.5             | 38.7             | 36.0 | 36.1 | 36.1 | 66.7 | 64.7 | 97.6  |
|                |      | $\mathbf{n}_3$ | 40  | 35.5             | 37.4             | 39.2             | 33.6 | 33.9 | 34.1 | 61.0 | 60.1 | 92.9  |
|                |      |                | 80  | 34.0             | 35.5             | 37.1             | 33.3 | 33.4 | 33.5 | 68.9 | 66.8 | 98.9  |
|                | LN   | $\mathbf{n}_1$ | 40  | 17.6             | 19.5             | 21.8             | 15.8 | 17.3 | 15.9 | 34.2 | 30.8 | 44.5  |
|                |      |                | 80  | 16.1             | 17.8             | 21.2             | 14.8 | 15.9 | 15.1 | 33.2 | 30.0 | 46.2  |
|                |      | $\mathbf{n}_2$ | 40  | 34.8             | 36.7             | 40.1             | 33.1 | 34.6 | 33.4 | 73.4 | 71.9 | 79.6  |
|                |      |                | 80  | 31.9             | 34.0             | 37.6             | 29.7 | 31.4 | 30.1 | 71.1 | 69.4 | 78.1  |
|                |      | $\mathbf{n}_3$ | 40  | 37.0             | 39.7             | 41.9             | 35.3 | 36.3 | 35.7 | 74.6 | 72.7 | 78.9  |
|                |      |                | 80  | 36.3             | 38.5             | 40.9             | 34.8 | 35.9 | 35.5 | 73.9 | 71.7 | 78.2  |

Table 11: Empirical sizes ( $\delta = 0$ ) and powers ( $\delta \neq 0$ ), as percentages, of the tests obtained for  $\mathbf{C}_2$  under Model 3 and standard normal distribution ( $M = 80$ ,  $\sigma^2 = 1.5\rho/2$ ,  $\mathbf{n}_1 = (10, 10, 10, 10)$ ,  $\mathbf{n}_3 = (10, 20, 15, 30)$ ,  $nr = 1000$ ,  $nboot = 10,000$  and  $\alpha = 5\%$ ). For  $M = 150$ , the results were very similar, and, therefore, they are omitted.

| <b>n</b>             | $\rho$ | $\delta$ | Test             |                  |                  |      |      |      |      |      |       |
|----------------------|--------|----------|------------------|------------------|------------------|------|------|------|------|------|-------|
|                      |        |          | L <sup>2</sup> N | L <sup>2</sup> B | L <sup>2</sup> b | FN   | FB   | Fb   | GPF  | GPFb | Fmaxb |
| <b>n<sub>1</sub></b> | 0.1    | 0.0      | 6.4              | 7.1              | 7.6              | 5.7  | 6.2  | 5.9  | 6.5  | 5.8  | 4.8   |
|                      |        | 0.2      | 55.8             | 58.1             | 60.3             | 53.4 | 55.7 | 54.1 | 58.3 | 54.6 | 79.4  |
|                      |        | 0.4      | 97.7             | 97.9             | 98.0             | 97.5 | 97.5 | 97.7 | 97.7 | 97.7 | 99.8  |
|                      |        | 0.6      | 100              | 100              | 100              | 100  | 100  | 100  | 100  | 100  | 100   |
|                      |        | 0.8      | 100              | 100              | 100              | 100  | 100  | 100  | 100  | 100  | 100   |
|                      |        | 1.0      | 100              | 100              | 100              | 100  | 100  | 100  | 100  | 100  | 100   |
|                      |        | 0.5      | 0.0              | 5.9              | 6.7              | 7.4  | 5.7  | 6.3  | 5.9  | 6.3  | 5.8   |
|                      | 0.5    | 0.2      | 13.1             | 15.7             | 17.1             | 12.3 | 14.3 | 12.2 | 14.8 | 13.1 | 13.4  |
|                      |        | 0.4      | 40.2             | 44.1             | 46.4             | 38.8 | 42.3 | 39.3 | 44.2 | 41.1 | 47.2  |
|                      |        | 0.6      | 76.3             | 78.2             | 79.2             | 75.1 | 77.1 | 75.2 | 78.2 | 76.2 | 85.3  |
|                      |        | 0.8      | 92.8             | 93.7             | 94.7             | 92.3 | 92.9 | 92.6 | 93.2 | 92.7 | 96.9  |
|                      |        | 1.0      | 98.4             | 98.5             | 98.7             | 98.4 | 98.4 | 98.4 | 98.5 | 98.4 | 99.7  |
|                      | 0.9    | 0.0      | 5.2              | 6.9              | 7.3              | 4.9  | 6.6  | 4.9  | 6.2  | 5.1  | 5.3   |
|                      |        | 0.2      | 5.7              | 8.4              | 8.9              | 5.2  | 7.5  | 5.1  | 7.4  | 5.6  | 7.0   |
|                      |        | 0.4      | 11.5             | 14.8             | 16.1             | 10.5 | 13.9 | 10.4 | 13.8 | 10.9 | 11.8  |
|                      |        | 0.6      | 24.5             | 29.8             | 31.2             | 23.5 | 28.3 | 23.2 | 27.6 | 24.5 | 20.9  |
|                      |        | 0.8      | 46.0             | 53.2             | 54.0             | 44.5 | 51.3 | 44.2 | 50.4 | 45.6 | 36.8  |
|                      |        | 1.0      | 68.3             | 73.1             | 73.9             | 67.8 | 72.1 | 67.6 | 71.6 | 68.3 | 57.3  |
| <b>n<sub>3</sub></b> | 0.1    | 0.0      | 6.5              | 6.6              | 6.7              | 6.4  | 6.5  | 6.4  | 6.7  | 6.1  | 5.3   |
|                      |        | 0.2      | 65.8             | 67.5             | 68.1             | 64.7 | 65.3 | 64.9 | 66.6 | 65.8 | 89.5  |
|                      |        | 0.4      | 99.3             | 99.4             | 99.3             | 99.3 | 99.3 | 99.3 | 99.4 | 99.4 | 99.8  |
|                      |        | 0.6      | 99.9             | 99.9             | 99.9             | 99.9 | 99.9 | 99.9 | 99.9 | 99.9 | 100   |
|                      |        | 0.8      | 100              | 100              | 100              | 100  | 100  | 100  | 100  | 100  | 100   |
|                      |        | 1.0      | 100              | 100              | 100              | 100  | 100  | 100  | 100  | 100  | 100   |
|                      | 0.5    | 0.0      | 6.3              | 6.7              | 7.0              | 6.2  | 6.5  | 6.1  | 6.9  | 5.9  | 5.9   |
|                      |        | 0.2      | 14.1             | 14.7             | 15.0             | 13.7 | 14.3 | 13.3 | 14.7 | 13.4 | 15.3  |
|                      |        | 0.4      | 49.3             | 51.2             | 51.1             | 48.5 | 50.0 | 47.5 | 50.4 | 48.9 | 57.5  |
|                      |        | 0.6      | 85.6             | 86.5             | 86.4             | 85.2 | 85.8 | 85.2 | 86.6 | 85.3 | 92.3  |
|                      |        | 0.8      | 97.5             | 97.6             | 97.6             | 97.5 | 97.6 | 97.4 | 97.8 | 97.5 | 99.3  |
|                      |        | 1.0      | 99.5             | 99.5             | 99.5             | 99.5 | 99.5 | 99.5 | 99.5 | 99.5 | 99.9  |
|                      | 0.9    | 0.0      | 5.7              | 7.6              | 7.3              | 5.5  | 7.0  | 5.4  | 6.9  | 5.7  | 5.9   |
|                      |        | 0.2      | 7.9              | 9.5              | 9.4              | 7.5  | 9.2  | 7.2  | 9.1  | 7.0  | 6.5   |
|                      |        | 0.4      | 16.1             | 18.4             | 18.2             | 15.8 | 18.2 | 15.2 | 16.6 | 15.1 | 13.5  |
|                      |        | 0.6      | 33.1             | 36.5             | 36.1             | 32.2 | 35.8 | 30.8 | 34.4 | 31.7 | 26.3  |
|                      |        | 0.8      | 56.2             | 60.6             | 59.7             | 55.5 | 59.9 | 54.3 | 59.1 | 55.6 | 45.3  |
|                      |        | 1.0      | 81.9             | 84.1             | 83.3             | 80.9 | 83.5 | 79.8 | 82.4 | 80.5 | 69.0  |

Table 12: Empirical sizes ( $\delta = 0$ ) and powers ( $\delta \neq 0$ ), as percentages, of the tests obtained for  $\mathbf{C}_2$  under Model 4 and standard normal distribution ( $M = 80$ ,  $\sigma^2 = 1.5\rho/2$ ,  $\mathbf{n}_1 = (10, 10, 10, 10)$ ,  $\mathbf{n}_3 = (10, 20, 15, 30)$ ,  $nr = 1000$ ,  $nboot = 10,000$  and  $\alpha = 5\%$ ). For  $M = 150$ , the results were very similar, and, therefore, they are omitted.

| $\mathbf{n}$   | $\rho$ | $\delta$ | Test             |                  |                  |      |      |      |      |      |       |
|----------------|--------|----------|------------------|------------------|------------------|------|------|------|------|------|-------|
|                |        |          | L <sup>2</sup> N | L <sup>2</sup> B | L <sup>2</sup> b | FN   | FB   | Fb   | GPF  | GPFb | Fmaxb |
| $\mathbf{n}_1$ | 0.1    | 0.0      | 6.6              | 7.4              | 7.9              | 5.8  | 5.8  | 5.9  | 6.6  | 5.6  | 5.7   |
|                |        | 0.2      | 55.6             | 58.0             | 61.0             | 52.6 | 53.0 | 53.2 | 55.1 | 53.2 | 89.3  |
|                |        | 0.4      | 97.3             | 97.7             | 97.6             | 97.1 | 97.1 | 97.1 | 97.6 | 97.1 | 100   |
|                |        | 0.6      | 99.9             | 99.9             | 99.9             | 99.9 | 99.9 | 99.9 | 100  | 100  | 100   |
|                |        | 0.8      | 99.9             | 99.9             | 99.9             | 99.9 | 99.9 | 99.9 | 100  | 100  | 100   |
|                |        | 1.0      | 99.9             | 100              | 100              | 99.9 | 99.9 | 100  | 100  | 100  | 100   |
|                |        | 0.5      | 0.0              | 6.0              | 6.5              | 7.4  | 5.8  | 6.0  | 5.8  | 6.5  | 5.6   |
|                | 0.5    | 0.2      | 13.2             | 15.4             | 17.0             | 12.2 | 13.1 | 12.3 | 15.1 | 13.4 | 14.8  |
|                |        | 0.4      | 40.4             | 43.9             | 46.8             | 38.6 | 40.6 | 39.7 | 43.6 | 40.3 | 53.5  |
|                |        | 0.6      | 76.5             | 78.1             | 78.9             | 75.3 | 76.6 | 75.8 | 77.7 | 76.2 | 88.2  |
|                |        | 0.8      | 92.6             | 93.6             | 94.4             | 92.1 | 92.5 | 92.4 | 93.0 | 92.4 | 97.6  |
|                |        | 1.0      | 98.2             | 98.3             | 98.3             | 98.0 | 98.1 | 98.2 | 98.4 | 98.3 | 99.8  |
|                |        | 0.9      | 0.0              | 5.5              | 6.5              | 6.9  | 5.2  | 6.3  | 5.2  | 6.2  | 5.1   |
|                |        | 0.2      | 5.7              | 8.1              | 8.7              | 5.4  | 7.4  | 5.4  | 7.6  | 5.9  | 6.2   |
|                |        | 0.4      | 12.0             | 15.3             | 16.6             | 11.2 | 13.8 | 11.1 | 14.3 | 11.7 | 11.1  |
|                |        | 0.6      | 25.6             | 30.5             | 31.9             | 24.3 | 28.6 | 23.9 | 29.0 | 25.8 | 21.3  |
|                |        | 0.8      | 46.9             | 53.3             | 55.0             | 45.1 | 51.7 | 45.7 | 50.9 | 47.4 | 37.9  |
|                |        | 1.0      | 69.7             | 73.7             | 75.0             | 68.1 | 72.2 | 68.2 | 72.7 | 69.4 | 59.1  |
| $\mathbf{n}_3$ | 0.1    | 0.0      | 5.0              | 5.3              | 5.7              | 4.5  | 4.6  | 4.6  | 5.1  | 4.7  | 4.8   |
|                |        | 0.2      | 59.7             | 60.8             | 62.6             | 58.2 | 58.4 | 58.4 | 59.6 | 58.7 | 96.9  |
|                |        | 0.4      | 99.8             | 99.8             | 99.8             | 99.8 | 99.8 | 99.8 | 100  | 100  | 100   |
|                |        | 0.6      | 99.9             | 99.9             | 99.9             | 99.9 | 99.9 | 99.9 | 100  | 100  | 100   |
|                |        | 0.8      | 99.9             | 99.9             | 99.9             | 99.9 | 99.9 | 99.9 | 100  | 100  | 100   |
|                |        | 1.0      | 100              | 100              | 100              | 100  | 100  | 100  | 100  | 100  | 100   |
|                |        | 0.5      | 0.0              | 4.8              | 5.2              | 5.5  | 4.6  | 4.8  | 4.8  | 4.9  | 5.4   |
|                | 0.5    | 0.2      | 13.6             | 14.4             | 15.6             | 13.1 | 13.5 | 13.2 | 14.2 | 13.3 | 15.9  |
|                |        | 0.4      | 44.5             | 46.6             | 48.0             | 43.8 | 44.5 | 44.1 | 46.8 | 45.2 | 60.0  |
|                |        | 0.6      | 83.2             | 83.9             | 84.8             | 82.9 | 83.2 | 83.0 | 84.4 | 83.0 | 94.5  |
|                |        | 0.8      | 98.5             | 98.5             | 98.6             | 98.5 | 98.5 | 98.5 | 98.6 | 98.5 | 99.7  |
|                |        | 1.0      | 99.7             | 99.7             | 99.8             | 99.7 | 99.7 | 99.7 | 99.9 | 99.9 | 100   |
|                |        | 0.9      | 0.0              | 5.9              | 6.9              | 7.2  | 5.4  | 6.3  | 5.4  | 6.1  | 5.7   |
|                |        | 0.2      | 8.3              | 9.9              | 10.1             | 8.0  | 9.6  | 8.0  | 9.1  | 8.0  | 7.2   |
|                |        | 0.4      | 15.9             | 18.0             | 18.7             | 15.8 | 17.2 | 15.9 | 17.2 | 15.9 | 13.5  |
|                |        | 0.6      | 33.4             | 37.2             | 38.4             | 33.1 | 36.0 | 33.1 | 35.6 | 33.8 | 26.3  |
|                |        | 0.8      | 60.6             | 63.2             | 64.7             | 59.7 | 62.5 | 59.4 | 61.9 | 59.5 | 46.5  |
|                |        | 1.0      | 81.9             | 83.5             | 84.5             | 81.7 | 83.4 | 81.4 | 82.9 | 81.7 | 67.3  |



Table 13: Empirical sizes ( $\delta = 0$ ) and powers ( $\delta \neq 0$ ), as percentages, of the tests obtained for  $\mathbf{C}_2$  under Model 5 and standard normal distribution ( $M = 80$ ,  $\mathbf{n}_1 = (10, 10, 10, 10)$ ,  $\mathbf{n}_3 = (10, 20, 15, 30)$ ,  $nr = 1000$ ,  $nboot = 10,000$  and  $\alpha = 5\%$ ).

| $\mathbf{n}$   | $\rho$ | $\delta$ | Test             |                  |                  |      |      |      |      |      |       |
|----------------|--------|----------|------------------|------------------|------------------|------|------|------|------|------|-------|
|                |        |          | L <sup>2</sup> N | L <sup>2</sup> B | L <sup>2</sup> b | FN   | FB   | Fb   | GPF  | GPFb | Fmaxb |
| $\mathbf{n}_1$ | 0.1    | 0.0      | 4.8              | 5.6              | 6.3              | 4.0  | 4.0  | 3.9  | 4.8  | 4.3  | 4.4   |
|                |        | 0.2      | 43.6             | 45.9             | 48.9             | 41.2 | 41.4 | 41.3 | 42.4 | 40.5 | 68.7  |
|                |        | 0.4      | 98.8             | 99.0             | 99.5             | 98.5 | 98.5 | 98.5 | 98.0 | 97.7 | 99.9  |
|                |        | 0.6      | 100              | 100              | 100              | 100  | 100  | 100  | 100  | 100  | 100   |
|                |        | 0.8      | 100              | 100              | 100              | 100  | 100  | 100  | 100  | 100  | 100   |
|                |        | 1.0      | 100              | 100              | 100              | 100  | 100  | 100  | 100  | 100  | 100   |
|                | 0.5    | 0.0      | 5.8              | 6.6              | 7.4              | 5.0  | 5.4  | 4.9  | 5.7  | 5.2  | 4.6   |
|                |        | 0.2      | 12.0             | 13.0             | 14.3             | 10.8 | 11.4 | 10.9 | 12.2 | 10.8 | 8.6   |
|                |        | 0.4      | 31.9             | 34.2             | 36.8             | 30.6 | 31.7 | 31.1 | 32.2 | 30.7 | 30.2  |
|                |        | 0.6      | 63.9             | 65.7             | 68.3             | 61.7 | 62.8 | 62.0 | 62.2 | 60.2 | 62.7  |
|                |        | 0.8      | 87.6             | 88.7             | 91.1             | 86.8 | 86.9 | 86.9 | 86.8 | 85.1 | 87.7  |
|                |        | 1.0      | 98.0             | 98.3             | 98.6             | 97.6 | 97.7 | 97.7 | 97.2 | 96.8 | 97.8  |
|                | 0.9    | 0.0      | 4.9              | 5.5              | 6.6              | 4.4  | 4.8  | 4.6  | 4.5  | 3.7  | 3.7   |
|                |        | 0.2      | 7.8              | 8.4              | 9.5              | 6.6  | 7.3  | 6.9  | 7.4  | 5.5  | 4.6   |
|                |        | 0.4      | 11.3             | 13.0             | 14.3             | 10.7 | 11.2 | 11.0 | 12.3 | 11.3 | 10.3  |
|                |        | 0.6      | 20.9             | 22.1             | 24.9             | 19.7 | 20.3 | 20.0 | 21.0 | 19.2 | 18.3  |
|                |        | 0.8      | 33.3             | 34.7             | 37.4             | 31.8 | 32.3 | 31.8 | 32.9 | 30.0 | 29.7  |
|                |        | 1.0      | 49.4             | 50.9             | 54.5             | 47.4 | 48.3 | 48.0 | 50.2 | 46.8 | 44.9  |
| $\mathbf{n}_3$ | 0.1    | 0.0      | 5.2              | 5.5              | 6.1              | 4.7  | 4.7  | 4.8  | 5.0  | 4.8  | 4.4   |
|                |        | 0.2      | 53.5             | 54.8             | 56.0             | 52.8 | 52.9 | 52.5 | 52.8 | 51.7 | 79.7  |
|                |        | 0.4      | 99.7             | 99.7             | 99.9             | 99.5 | 99.6 | 99.6 | 99.3 | 99.2 | 100   |
|                |        | 0.6      | 100              | 100              | 100              | 100  | 100  | 100  | 100  | 100  | 100   |
|                |        | 0.8      | 100              | 100              | 100              | 100  | 100  | 100  | 100  | 100  | 100   |
|                |        | 1.0      | 100              | 100              | 100              | 100  | 100  | 100  | 100  | 100  | 100   |
|                | 0.5    | 0.0      | 5.2              | 5.4              | 5.9              | 4.8  | 5.2  | 4.9  | 5.1  | 4.9  | 4.0   |
|                |        | 0.2      | 13.2             | 14.1             | 14.9             | 12.8 | 13.0 | 12.8 | 13.9 | 12.7 | 11.5  |
|                |        | 0.4      | 39.6             | 40.8             | 43.0             | 39.0 | 39.3 | 39.2 | 40.1 | 39.2 | 41.0  |
|                |        | 0.6      | 71.9             | 72.6             | 73.4             | 70.9 | 71.3 | 70.8 | 70.4 | 69.6 | 71.4  |
|                |        | 0.8      | 92.6             | 92.7             | 93.5             | 92.1 | 92.3 | 92.2 | 91.4 | 90.6 | 93.5  |
|                |        | 1.0      | 99.3             | 99.3             | 99.4             | 99.3 | 99.3 | 99.3 | 98.8 | 98.6 | 99.2  |
|                | 0.9    | 0.0      | 4.4              | 5.1              | 5.4              | 4.0  | 4.4  | 4.1  | 4.4  | 3.9  | 3.8   |
|                |        | 0.2      | 6.5              | 7.2              | 8.0              | 6.2  | 6.4  | 6.5  | 6.9  | 6.0  | 6.4   |
|                |        | 0.4      | 12.5             | 13.2             | 13.8             | 11.9 | 12.5 | 12.0 | 13.0 | 11.6 | 10.5  |
|                |        | 0.6      | 24.2             | 25.2             | 26.8             | 23.3 | 24.0 | 23.4 | 24.6 | 23.2 | 20.4  |
|                |        | 0.8      | 40.8             | 42.3             | 43.7             | 39.5 | 40.5 | 39.4 | 39.6 | 38.9 | 34.9  |
|                |        | 1.0      | 58.2             | 59.5             | 61.2             | 57.4 | 58.0 | 57.0 | 58.5 | 57.2 | 52.1  |

Table 14: Empirical sizes ( $\delta = 0$ ) and powers ( $\delta \neq 0$ ), as percentages, of the tests obtained for  $\mathbf{C}_2$  under Model 6 and standard normal distribution ( $M = 80$ ,  $\sigma^2 = 1.5\rho/2$ ,  $\mathbf{n}_1 = (10, 10, 10, 10)$ ,  $\mathbf{n}_3 = (10, 20, 15, 30)$ ,  $nr = 1000$ ,  $nboot = 10,000$  and  $\alpha = 5\%$ ).

| $\mathbf{n}$   | $\rho$ | $\delta$ | Test             |                  |                  |      |      |      |      |      |       |
|----------------|--------|----------|------------------|------------------|------------------|------|------|------|------|------|-------|
|                |        |          | L <sup>2</sup> N | L <sup>2</sup> B | L <sup>2</sup> b | FN   | FB   | Fb   | GPF  | GPFb | Fmaxb |
| $\mathbf{n}_1$ | 0.1    | 0.0      | 5.5              | 5.9              | 6.6              | 4.4  | 4.4  | 4.3  | 5.4  | 4.2  | 5.1   |
|                |        | 0.2      | 38.4             | 40.2             | 42.1             | 35.3 | 35.5 | 35.4 | 36.2 | 34.2 | 46.5  |
|                |        | 0.4      | 95.1             | 95.5             | 95.9             | 94.2 | 94.3 | 94.3 | 93.2 | 92.3 | 98.0  |
|                |        | 0.6      | 99.9             | 99.9             | 99.9             | 99.8 | 99.8 | 99.8 | 99.8 | 99.7 | 99.9  |
|                |        | 0.8      | 100              | 100              | 100              | 100  | 100  | 100  | 100  | 100  | 100   |
|                |        | 1.0      | 100              | 100              | 100              | 100  | 100  | 100  | 100  | 100  | 100   |
|                |        | 0.5      | 4.4              | 5.2              | 6.1              | 3.9  | 4.1  | 4.1  | 4.8  | 4.1  | 3.6   |
|                | 0.5    | 0.2      | 11.3             | 12.0             | 13.6             | 11.0 | 11.1 | 11.0 | 12.3 | 11.0 | 10.2  |
|                |        | 0.4      | 30.6             | 32.0             | 34.2             | 28.4 | 29.2 | 28.7 | 31.0 | 28.4 | 28.2  |
|                |        | 0.6      | 58.6             | 60.2             | 63.3             | 56.6 | 57.2 | 56.8 | 56.7 | 54.6 | 57.4  |
|                |        | 0.8      | 85.4             | 86.2             | 87.9             | 84.0 | 84.4 | 84.3 | 82.0 | 80.2 | 83.0  |
|                |        | 1.0      | 96.0             | 96.3             | 97.1             | 95.9 | 95.9 | 95.9 | 95.1 | 94.5 | 95.8  |
|                |        | 0.9      | 4.9              | 5.7              | 7.0              | 4.4  | 4.6  | 4.7  | 5.6  | 4.5  | 4.3   |
|                |        | 0.2      | 7.1              | 7.4              | 9.2              | 6.1  | 6.7  | 6.5  | 7.9  | 7.4  | 6.3   |
|                |        | 0.4      | 11.8             | 12.6             | 13.9             | 11.1 | 11.6 | 11.5 | 12.7 | 11.6 | 10.7  |
|                |        | 0.6      | 21.1             | 22.2             | 24.7             | 19.4 | 20.1 | 19.8 | 21.6 | 20.0 | 18.4  |
|                |        | 0.8      | 32.4             | 34.6             | 37.1             | 30.5 | 31.4 | 31.1 | 33.5 | 31.2 | 29.0  |
|                |        | 1.0      | 47.9             | 49.7             | 52.6             | 46.2 | 47.4 | 46.5 | 47.7 | 45.2 | 44.3  |
| $\mathbf{n}_3$ | 0.1    | 0.0      | 4.9              | 5.4              | 6.2              | 4.5  | 4.5  | 4.7  | 5.0  | 4.7  | 4.7   |
|                |        | 0.2      | 45.8             | 46.7             | 48.0             | 45.0 | 45.0 | 44.4 | 44.0 | 42.9 | 56.9  |
|                |        | 0.4      | 97.5             | 97.5             | 97.7             | 97.1 | 97.1 | 97.3 | 95.7 | 95.5 | 99.6  |
|                |        | 0.6      | 100              | 100              | 100              | 100  | 100  | 100  | 100  | 100  | 100   |
|                |        | 0.8      | 100              | 100              | 100              | 100  | 100  | 100  | 100  | 100  | 100   |
|                |        | 1.0      | 100              | 100              | 100              | 100  | 100  | 100  | 100  | 100  | 100   |
|                |        | 0.5      | 5.4              | 5.5              | 5.9              | 5.2  | 5.4  | 5.1  | 5.4  | 5.3  | 6.0   |
|                | 0.5    | 0.2      | 12.3             | 12.9             | 14.0             | 11.5 | 11.7 | 11.5 | 12.5 | 11.7 | 12.5  |
|                |        | 0.4      | 35.3             | 36.0             | 37.2             | 34.4 | 34.9 | 34.5 | 34.9 | 33.9 | 34.2  |
|                |        | 0.6      | 66.8             | 67.0             | 68.5             | 66.3 | 66.7 | 66.6 | 65.1 | 64.4 | 67.9  |
|                |        | 0.8      | 89.9             | 90.5             | 91.3             | 89.4 | 89.4 | 89.3 | 88.4 | 87.4 | 89.2  |
|                |        | 1.0      | 98.4             | 98.4             | 98.5             | 98.3 | 98.3 | 98.3 | 97.4 | 97.3 | 98.6  |
|                |        | 0.9      | 5.7              | 6.1              | 6.7              | 5.4  | 5.7  | 5.6  | 6.2  | 5.4  | 6.2   |
|                |        | 0.2      | 7.6              | 8.2              | 8.9              | 7.0  | 7.6  | 7.2  | 8.1  | 7.5  | 7.5   |
|                |        | 0.4      | 13.0             | 13.5             | 14.9             | 12.4 | 12.6 | 12.5 | 13.6 | 12.8 | 12.3  |
|                |        | 0.6      | 23.0             | 24.2             | 25.5             | 22.7 | 23.0 | 22.8 | 22.7 | 22.1 | 22.2  |
|                |        | 0.8      | 37.8             | 39.5             | 41.7             | 37.2 | 37.9 | 37.1 | 38.7 | 37.8 | 34.9  |
|                |        | 1.0      | 56.9             | 57.7             | 59.0             | 56.1 | 56.8 | 55.9 | 56.1 | 54.4 | 51.9  |

Table 15: Experimentwise error rates (as percentages) of the tests obtained under Model 1 when all group mean functions are equal, i.e.,  $\delta = 0$  ( $\mathbf{n}_1 = (10, 10, 10, 10)$ ,  $\mathbf{n}_2 = (20, 20, 20, 20)$ ,  $\mathbf{n}_3 = (10, 20, 15, 30)$ ,  $nr = 1000$ ,  $nboot = 10,000$  and  $\alpha = 5\%$ ). See also Figure 7.

| Distr.         | $\mathbf{n}$   | $\rho$ | $M$ | Test             |                  |                  |      |      |      |      |      |       |
|----------------|----------------|--------|-----|------------------|------------------|------------------|------|------|------|------|------|-------|
|                |                |        |     | L <sup>2</sup> N | L <sup>2</sup> B | L <sup>2</sup> b | FN   | FB   | Fb   | GPF  | GPFb | Fmaxb |
| $N(0, 1)$      | $\mathbf{n}_1$ | 0.1    | 80  | 20.7             | 22.3             | 24.4             | 18.7 | 18.9 | 19.0 | 20.4 | 18.5 | 19.9  |
|                |                |        | 150 | 21.1             | 22.9             | 25.6             | 18.6 | 18.6 | 18.9 | 20.7 | 18.9 | 19.2  |
|                |                | 0.5    | 80  | 22.2             | 24.4             | 28.6             | 19.9 | 22.0 | 20.5 | 23.9 | 20.5 | 20.2  |
|                |                |        | 150 | 21.8             | 24.6             | 28.3             | 20.0 | 21.7 | 20.4 | 22.4 | 19.9 | 21.9  |
|                |                | 0.9    | 80  | 14.8             | 20.6             | 23.5             | 13.3 | 18.8 | 13.0 | 18.0 | 13.3 | 19.2  |
|                |                |        | 150 | 18.6             | 26.1             | 29.1             | 17.5 | 23.7 | 17.4 | 23.2 | 18.8 | 22.7  |
|                | $\mathbf{n}_2$ | 0.1    | 80  | 20.9             | 21.7             | 22.9             | 20.0 | 20.0 | 19.9 | 21.0 | 20.1 | 19.5  |
|                |                |        | 150 | 21.0             | 21.8             | 23.6             | 19.7 | 19.7 | 19.9 | 20.8 | 19.5 | 20.4  |
|                |                | 0.5    | 80  | 21.8             | 23.7             | 25.7             | 21.0 | 21.9 | 20.9 | 22.9 | 21.7 | 23.7  |
|                |                |        | 150 | 21.1             | 22.6             | 24.8             | 20.5 | 21.1 | 20.8 | 22.4 | 20.8 | 22.8  |
|                |                | 0.9    | 80  | 19.5             | 22.1             | 22.9             | 19.1 | 21.6 | 19.0 | 20.9 | 18.8 | 21.0  |
|                |                |        | 150 | 18.2             | 21.6             | 22.8             | 17.7 | 20.6 | 17.7 | 19.8 | 18.1 | 21.0  |
|                | $\mathbf{n}_3$ | 0.1    | 80  | 21.8             | 22.4             | 23.7             | 20.4 | 20.5 | 20.5 | 21.7 | 20.1 | 20.4  |
|                |                |        | 150 | 20.8             | 21.9             | 23.5             | 19.2 | 19.4 | 19.7 | 20.3 | 20.0 | 20.3  |
|                |                | 0.5    | 80  | 21.4             | 22.8             | 24.8             | 20.2 | 21.5 | 20.4 | 22.9 | 20.8 | 22.5  |
|                |                |        | 150 | 20.9             | 22.2             | 24.4             | 20.3 | 21.1 | 20.7 | 22.7 | 21.7 | 21.4  |
|                |                | 0.9    | 80  | 18.6             | 22.7             | 24.5             | 18.1 | 21.6 | 18.0 | 21.1 | 18.7 | 23.2  |
|                |                |        | 150 | 17.7             | 21.1             | 23.4             | 17.4 | 20.2 | 17.4 | 21.0 | 18.3 | 22.7  |
| $t_4/\sqrt{2}$ | $\mathbf{n}_1$ | 0.1    | 80  | 22.0             | 24.7             | 28.0             | 19.7 | 19.9 | 20.2 | 22.3 | 20.4 | 20.1  |
|                |                |        | 150 | 22.2             | 23.9             | 26.0             | 19.9 | 20.0 | 20.2 | 22.5 | 20.7 | 18.7  |
|                |                | 0.5    | 80  | 20.0             | 22.8             | 25.2             | 18.3 | 19.7 | 19.4 | 21.7 | 20.0 | 20.7  |
|                |                |        | 150 | 19.1             | 21.3             | 24.6             | 17.3 | 18.8 | 17.6 | 20.1 | 18.0 | 20.4  |
|                |                | 0.9    | 80  | 17.1             | 23.0             | 24.7             | 15.4 | 21.3 | 15.5 | 20.4 | 16.6 | 22.5  |
|                |                |        | 150 | 17.0             | 23.2             | 25.0             | 16.3 | 20.5 | 16.5 | 22.5 | 18.2 | 23.4  |
|                | $\mathbf{n}_2$ | 0.1    | 80  | 22.7             | 23.5             | 24.4             | 21.9 | 22.0 | 22.3 | 22.2 | 22.1 | 21.3  |
|                |                |        | 150 | 20.8             | 21.2             | 22.0             | 19.4 | 19.7 | 20.0 | 20.6 | 20.3 | 19.9  |
|                |                | 0.5    | 80  | 20.6             | 21.0             | 22.5             | 19.9 | 20.5 | 20.1 | 21.0 | 20.3 | 21.7  |
|                |                |        | 150 | 21.6             | 22.5             | 23.4             | 20.7 | 21.7 | 21.1 | 22.5 | 21.6 | 21.4  |
|                |                | 0.9    | 80  | 18.0             | 22.2             | 22.4             | 17.1 | 21.3 | 16.7 | 19.9 | 17.8 | 21.9  |
|                |                |        | 150 | 20.6             | 24.9             | 25.5             | 19.9 | 23.0 | 20.0 | 22.3 | 19.5 | 24.2  |
|                | $\mathbf{n}_3$ | 0.1    | 80  | 20.8             | 22.0             | 22.9             | 19.6 | 19.8 | 19.6 | 20.9 | 20.2 | 20.1  |
|                |                |        | 150 | 21.1             | 22.2             | 22.9             | 19.5 | 19.9 | 19.5 | 20.8 | 19.5 | 20.4  |
|                |                | 0.5    | 80  | 17.1             | 18.3             | 19.8             | 16.3 | 17.0 | 16.3 | 18.1 | 17.5 | 19.2  |
|                |                |        | 150 | 21.8             | 23.7             | 24.3             | 20.9 | 22.0 | 21.3 | 22.9 | 21.6 | 20.9  |
|                |                | 0.9    | 80  | 19.4             | 23.7             | 23.9             | 18.7 | 23.0 | 17.8 | 22.3 | 19.4 | 24.2  |
|                |                |        | 150 | 18.3             | 22.7             | 21.9             | 17.8 | 21.0 | 16.4 | 19.4 | 16.8 | 19.7  |

Table 16: Experimentwise error rates (as percentages) of the tests obtained under Model 1 and standard normal distribution when the group mean functions are not equal, i.e.,  $\delta \neq 0$  ( $M = 80$ ,  $\mathbf{n}_1 = (10, 10, 10, 10)$ ,  $\mathbf{n}_3 = (10, 20, 15, 30)$ ,  $nr = 1000$ ,  $nboot = 10,000$  and  $\alpha = 5\%$ ). For  $M = 150$ , the results were very similar, and, therefore, they are omitted. See also Figure 8.

| n              | $\rho$ | $\delta$ | Test             |                  |                  |      |      |      |      |      |       |
|----------------|--------|----------|------------------|------------------|------------------|------|------|------|------|------|-------|
|                |        |          | L <sup>2</sup> N | L <sup>2</sup> B | L <sup>2</sup> b | FN   | FB   | Fb   | GPF  | GPFb | Fmaxb |
| n <sub>1</sub> | 0.1    | 0.2      | 10.1             | 11.1             | 13.5             | 9.1  | 9.2  | 9.1  | 10.2 | 9.2  | 8.5   |
|                |        | 0.4      | 11.4             | 12.1             | 14.2             | 9.9  | 10.0 | 10.2 | 11.0 | 9.9  | 9.0   |
|                |        | 0.6      | 12.4             | 13.4             | 14.7             | 11.1 | 11.2 | 11.2 | 12.0 | 10.9 | 10.7  |
|                |        | 0.8      | 10.8             | 11.6             | 13.1             | 8.6  | 8.8  | 8.8  | 10.8 | 9.2  | 9.5   |
|                |        | 1.0      | 12.4             | 13.4             | 15.1             | 11.0 | 11.1 | 10.9 | 12.0 | 10.8 | 10.7  |
|                | 0.5    | 0.2      | 10.7             | 12.0             | 14.1             | 9.9  | 10.6 | 9.9  | 11.5 | 10.0 | 11.1  |
|                |        | 0.4      | 11.6             | 13.5             | 14.9             | 10.8 | 11.9 | 10.9 | 13.1 | 11.1 | 10.5  |
|                |        | 0.6      | 10.4             | 11.9             | 13.8             | 9.3  | 10.3 | 9.5  | 11.0 | 10.1 | 10.5  |
|                |        | 0.8      | 11.1             | 12.8             | 14.7             | 10.2 | 11.2 | 10.3 | 12.5 | 11.3 | 10.9  |
|                |        | 1.0      | 11.7             | 12.8             | 15.2             | 11.1 | 11.6 | 11.3 | 12.5 | 11.5 | 10.4  |
|                | 0.9    | 0.2      | 7.3              | 11.1             | 13.0             | 6.8  | 9.9  | 6.8  | 9.5  | 7.8  | 11.7  |
|                |        | 0.4      | 9.2              | 12.1             | 14.2             | 8.0  | 11.5 | 7.8  | 11.3 | 8.8  | 10.9  |
|                |        | 0.6      | 9.3              | 12.3             | 13.1             | 8.6  | 11.6 | 8.6  | 10.9 | 8.5  | 10.2  |
|                |        | 0.8      | 6.5              | 10.0             | 12.3             | 5.8  | 9.1  | 5.8  | 8.9  | 6.9  | 10.3  |
|                |        | 1.0      | 7.2              | 10.8             | 13.2             | 6.9  | 10.1 | 6.9  | 9.6  | 8.1  | 10.4  |
| n <sub>3</sub> | 0.1    | 0.2      | 9.1              | 9.7              | 10.8             | 8.3  | 8.3  | 8.6  | 9.1  | 8.6  | 8.5   |
|                |        | 0.4      | 11.6             | 12.5             | 13.5             | 10.5 | 10.6 | 10.5 | 11.5 | 10.5 | 10.9  |
|                |        | 0.6      | 9.5              | 10.2             | 11.0             | 8.9  | 8.9  | 9.2  | 9.4  | 9.0  | 10.0  |
|                |        | 0.8      | 9.9              | 10.8             | 11.6             | 9.2  | 9.2  | 9.4  | 10.0 | 9.5  | 9.0   |
|                |        | 1.0      | 11.7             | 12.5             | 13.3             | 10.9 | 11.1 | 11.0 | 11.9 | 11.0 | 10.4  |
|                | 0.5    | 0.2      | 9.6              | 10.3             | 11.4             | 9.4  | 9.7  | 9.3  | 10.2 | 9.3  | 9.4   |
|                |        | 0.4      | 9.6              | 10.4             | 12.3             | 8.8  | 9.6  | 9.3  | 9.9  | 9.3  | 10.0  |
|                |        | 0.6      | 10.1             | 10.6             | 11.2             | 9.7  | 10.1 | 9.7  | 10.5 | 9.9  | 9.4   |
|                |        | 0.8      | 10.7             | 11.6             | 13.1             | 10.4 | 10.6 | 10.4 | 11.2 | 10.7 | 10.3  |
|                |        | 1.0      | 10.2             | 10.7             | 11.5             | 9.9  | 10.2 | 9.8  | 10.5 | 9.7  | 10.2  |
|                | 0.9    | 0.2      | 8.4              | 11.3             | 12.2             | 8.0  | 10.6 | 8.1  | 9.9  | 8.7  | 9.2   |
|                |        | 0.4      | 8.6              | 10.6             | 11.1             | 8.2  | 10.1 | 7.9  | 9.3  | 7.8  | 10.3  |
|                |        | 0.6      | 8.2              | 9.7              | 10.6             | 7.7  | 9.4  | 7.5  | 8.5  | 7.4  | 10.6  |
|                |        | 0.8      | 8.5              | 10.6             | 11.2             | 8.1  | 9.9  | 8.0  | 9.4  | 8.4  | 8.6   |
|                |        | 1.0      | 6.6              | 8.4              | 9.9              | 6.4  | 7.9  | 6.5  | 8.1  | 6.6  | 10.1  |

Table 17: Experimentwise error rates (as percentages) of the tests obtained under Model 1 and  $t$ -distribution  $t_4/\sqrt{2}$  when the group mean functions are not equal, i.e.,  $\delta \neq 0$  ( $M = 80$ ,  $\mathbf{n}_1 = (10, 10, 10, 10)$ ,  $\mathbf{n}_3 = (10, 20, 15, 30)$ ,  $nr = 1000$ ,  $nboot = 10,000$  and  $\alpha = 5\%$ ). For  $M = 150$ , the results were very similar, and, therefore, they are omitted. See also Figure 8.

| n              | $\rho$         | $\delta$ | Test             |                  |                  |      |      |      |      |      |       |      |
|----------------|----------------|----------|------------------|------------------|------------------|------|------|------|------|------|-------|------|
|                |                |          | L <sup>2</sup> N | L <sup>2</sup> B | L <sup>2</sup> b | FN   | FB   | Fb   | GPF  | GPFb | Fmaxb |      |
| n <sub>1</sub> | 0.1            | 0.2      | 10.2             | 11.8             | 12.9             | 9.5  | 9.5  | 9.7  | 10.2 | 9.8  | 9.8   |      |
|                |                | 0.4      | 10.8             | 11.8             | 12.7             | 9.8  | 9.8  | 10.4 | 10.8 | 10.2 | 9.8   |      |
|                |                | 0.6      | 11.8             | 12.5             | 13.9             | 10.7 | 10.7 | 10.9 | 11.5 | 10.7 | 10.5  |      |
|                |                | 0.8      | 11.4             | 12.7             | 14.1             | 10.0 | 10.1 | 10.5 | 11.3 | 10.2 | 9.8   |      |
|                |                | 1.0      | 11.2             | 12.5             | 14.1             | 10.4 | 10.6 | 10.1 | 11.6 | 10.4 | 10.5  |      |
|                | 0.5            | 0.2      | 9.3              | 10.6             | 12.6             | 8.8  | 9.2  | 9.1  | 10.1 | 8.6  | 8.7   |      |
|                |                | 0.4      | 11.8             | 13.7             | 15.4             | 11.0 | 11.9 | 11.1 | 13.1 | 11.5 | 11.8  |      |
|                |                | 0.6      | 10.9             | 12.4             | 13.5             | 9.8  | 11.0 | 10.6 | 11.1 | 9.9  | 8.9   |      |
|                |                | 0.8      | 9.2              | 10.8             | 12.2             | 8.4  | 9.3  | 8.4  | 11.5 | 10.0 | 9.7   |      |
|                |                | 1.0      | 9.6              | 10.9             | 13.1             | 8.4  | 9.3  | 8.8  | 10.5 | 8.6  | 9.5   |      |
|                | 0.9            | 0.2      | 6.8              | 9.3              | 10.3             | 6.6  | 8.5  | 6.4  | 8.1  | 6.9  | 7.7   |      |
|                |                | 0.4      | 6.9              | 10.7             | 11.9             | 6.2  | 9.3  | 6.5  | 9.4  | 6.7  | 9.7   |      |
|                |                | 0.6      | 6.8              | 10.6             | 11.4             | 5.9  | 9.3  | 5.7  | 8.8  | 6.2  | 10.0  |      |
|                |                | 0.8      | 7.2              | 10.5             | 11.3             | 6.9  | 9.5  | 6.8  | 9.5  | 7.8  | 9.6   |      |
|                |                | 1.0      | 6.6              | 9.4              | 11.1             | 6.4  | 8.5  | 6.3  | 8.5  | 6.9  | 9.5   |      |
|                | n <sub>3</sub> | 0.1      | 0.2              | 9.7              | 10.3             | 10.7 | 9.3  | 9.3  | 9.2  | 9.6  | 9.3   | 9.0  |
|                |                |          | 0.4              | 9.6              | 10.1             | 10.7 | 9.0  | 9.0  | 9.3  | 9.7  | 9.3   | 9.5  |
|                |                |          | 0.6              | 8.7              | 9.3              | 9.7  | 8.5  | 8.5  | 8.2  | 8.8  | 8.3   | 8.4  |
|                |                |          | 0.8              | 12.1             | 12.7             | 13.7 | 11.2 | 11.5 | 11.2 | 11.9 | 11.0  | 11.9 |
|                |                |          | 1.0              | 10.7             | 11.4             | 11.8 | 9.9  | 10.0 | 10.1 | 10.6 | 10.2  | 10.2 |
| 0.5            |                | 0.2      | 7.9              | 8.9              | 9.7              | 7.5  | 8.2  | 7.5  | 8.8  | 8.2  | 8.1   |      |
|                |                | 0.4      | 10.4             | 11.2             | 11.7             | 9.9  | 10.3 | 10.2 | 11.1 | 9.9  | 8.8   |      |
|                |                | 0.6      | 10.0             | 10.9             | 11.6             | 9.7  | 10.0 | 9.5  | 11.0 | 9.8  | 8.9   |      |
|                |                | 0.8      | 10.5             | 11.2             | 12.4             | 10.2 | 10.5 | 10.2 | 11.0 | 10.5 | 10.2  |      |
|                |                | 1.0      | 10.2             | 11.1             | 11.6             | 9.7  | 10.3 | 9.6  | 10.7 | 10.0 | 9.4   |      |
| 0.9            |                | 0.2      | 8.8              | 10.4             | 10.6             | 8.3  | 9.8  | 7.8  | 10.1 | 8.3  | 10.4  |      |
|                |                | 0.4      | 8.0              | 9.7              | 9.4              | 7.7  | 9.3  | 7.6  | 8.7  | 7.8  | 8.3   |      |
|                |                | 0.6      | 8.1              | 9.3              | 9.5              | 7.8  | 9.2  | 7.8  | 9.4  | 8.0  | 9.2   |      |
|                |                | 0.8      | 7.3              | 9.3              | 9.4              | 6.9  | 8.9  | 6.4  | 8.7  | 7.0  | 9.3   |      |
|                |                | 1.0      | 7.1              | 9.5              | 9.7              | 7.0  | 9.2  | 6.9  | 8.6  | 7.0  | 10.0  |      |

Table 18: Comparisonwise error rates (as percentages) of the tests obtained under Model 1 when all group mean functions are equal, i.e.,  $\delta = 0$  ( $\mathbf{n}_1 = (10, 10, 10, 10)$ ,  $\mathbf{n}_2 = (20, 20, 20, 20)$ ,  $\mathbf{n}_3 = (10, 20, 15, 30)$ ,  $nr = 1000$ ,  $nboot = 10,000$  and  $\alpha = 5\%$ ). See also Figure 9.

| Distr.         | $\mathbf{n}$   | $\rho$ | $M$ | Test             |                  |                  |      |      |      |      |      |       |
|----------------|----------------|--------|-----|------------------|------------------|------------------|------|------|------|------|------|-------|
|                |                |        |     | L <sup>2</sup> N | L <sup>2</sup> B | L <sup>2</sup> b | FN   | FB   | Fb   | GPF  | GPFb | Fmaxb |
| $N(0, 1)$      | $\mathbf{n}_1$ | 0.1    | 80  | 5.53             | 6.02             | 6.88             | 4.95 | 4.98 | 5.00 | 5.43 | 4.85 | 5.07  |
|                |                |        | 150 | 5.42             | 6.07             | 6.88             | 4.65 | 4.67 | 4.75 | 5.27 | 4.70 | 4.57  |
|                |                | 0.5    | 80  | 5.65             | 6.37             | 7.55             | 5.00 | 5.67 | 5.15 | 6.12 | 5.23 | 5.22  |
|                |                |        | 150 | 5.42             | 6.23             | 7.40             | 4.93 | 5.37 | 5.00 | 5.65 | 4.95 | 5.28  |
|                |                | 0.9    | 80  | 3.18             | 4.72             | 5.62             | 2.85 | 4.22 | 2.77 | 4.10 | 3.02 | 4.18  |
|                |                |        | 150 | 4.18             | 6.05             | 6.92             | 3.88 | 5.43 | 3.85 | 5.45 | 4.20 | 5.07  |
|                | $\mathbf{n}_2$ | 0.1    | 80  | 5.52             | 5.77             | 6.10             | 5.18 | 5.18 | 5.22 | 5.50 | 5.22 | 5.10  |
|                |                |        | 150 | 5.20             | 5.48             | 5.98             | 4.88 | 4.88 | 4.92 | 5.18 | 4.88 | 4.78  |
|                |                | 0.5    | 80  | 5.25             | 5.77             | 6.40             | 5.02 | 5.28 | 5.03 | 5.58 | 5.18 | 5.40  |
|                |                |        | 150 | 5.48             | 5.98             | 6.55             | 5.20 | 5.53 | 5.30 | 5.82 | 5.38 | 5.38  |
|                |                | 0.9    | 80  | 4.40             | 5.23             | 5.45             | 4.30 | 5.05 | 4.25 | 4.80 | 4.23 | 4.68  |
|                |                |        | 150 | 4.17             | 5.05             | 5.37             | 4.05 | 4.78 | 4.02 | 4.70 | 4.13 | 4.75  |
|                | $\mathbf{n}_3$ | 0.1    | 80  | 5.57             | 5.83             | 6.20             | 5.17 | 5.20 | 5.23 | 5.50 | 5.13 | 5.03  |
|                |                |        | 150 | 5.35             | 5.68             | 6.10             | 4.92 | 4.97 | 5.05 | 5.22 | 5.07 | 5.03  |
|                |                | 0.5    | 80  | 5.13             | 5.53             | 6.27             | 4.85 | 5.15 | 4.88 | 5.60 | 5.07 | 5.28  |
|                |                |        | 150 | 5.20             | 5.55             | 6.13             | 5.00 | 5.23 | 5.13 | 5.58 | 5.37 | 5.02  |
|                |                | 0.9    | 80  | 4.20             | 5.18             | 5.68             | 4.08 | 4.90 | 4.07 | 4.90 | 4.27 | 5.33  |
|                |                |        | 150 | 4.23             | 5.13             | 5.80             | 4.15 | 4.87 | 4.17 | 5.07 | 4.37 | 5.18  |
| $t_4/\sqrt{2}$ | $\mathbf{n}_1$ | 0.1    | 80  | 5.52             | 6.25             | 7.15             | 4.75 | 4.82 | 4.95 | 5.55 | 4.95 | 4.87  |
|                |                |        | 150 | 5.60             | 6.17             | 6.87             | 4.98 | 5.02 | 5.05 | 5.60 | 5.18 | 4.75  |
|                |                | 0.5    | 80  | 4.82             | 5.77             | 6.62             | 4.35 | 4.83 | 4.63 | 5.33 | 4.78 | 4.68  |
|                |                |        | 150 | 4.60             | 5.22             | 6.03             | 4.10 | 4.55 | 4.22 | 4.93 | 4.30 | 4.77  |
|                |                | 0.9    | 80  | 3.82             | 5.37             | 5.87             | 3.42 | 4.80 | 3.43 | 4.88 | 3.83 | 5.03  |
|                |                |        | 150 | 3.62             | 5.27             | 5.95             | 3.38 | 4.55 | 3.42 | 5.05 | 3.88 | 5.30  |
|                | $\mathbf{n}_2$ | 0.1    | 80  | 5.65             | 5.92             | 6.27             | 5.25 | 5.28 | 5.40 | 5.55 | 5.38 | 5.47  |
|                |                |        | 150 | 5.23             | 5.45             | 5.67             | 4.85 | 4.92 | 5.05 | 5.18 | 5.07 | 4.83  |
|                |                | 0.5    | 80  | 4.77             | 5.00             | 5.40             | 4.47 | 4.75 | 4.62 | 4.85 | 4.57 | 5.05  |
|                |                |        | 150 | 5.10             | 5.35             | 5.73             | 4.90 | 5.12 | 4.98 | 5.32 | 5.08 | 4.87  |
|                |                | 0.9    | 80  | 3.85             | 4.87             | 4.97             | 3.65 | 4.62 | 3.55 | 4.45 | 3.92 | 4.68  |
|                |                |        | 150 | 4.53             | 5.60             | 5.68             | 4.32 | 5.18 | 4.30 | 4.83 | 4.25 | 5.05  |
|                | $\mathbf{n}_3$ | 0.1    | 80  | 5.43             | 5.88             | 6.10             | 5.02 | 5.07 | 5.08 | 5.53 | 5.23 | 5.02  |
|                |                |        | 150 | 5.17             | 5.43             | 5.67             | 4.72 | 4.82 | 4.75 | 5.08 | 4.73 | 4.90  |
|                |                | 0.5    | 80  | 4.53             | 4.90             | 5.27             | 4.28 | 4.53 | 4.27 | 4.77 | 4.50 | 4.43  |
|                |                |        | 150 | 5.47             | 5.93             | 6.27             | 5.27 | 5.52 | 5.33 | 5.63 | 5.25 | 5.20  |
|                |                | 0.9    | 80  | 4.55             | 5.73             | 5.65             | 4.35 | 5.35 | 4.13 | 5.32 | 4.43 | 5.25  |
|                |                |        | 150 | 4.63             | 5.87             | 5.63             | 4.43 | 5.43 | 4.17 | 4.93 | 4.17 | 4.42  |

Table 19: Comparisonwise error rates (as percentages) of the tests obtained under Model 1 and standard normal distribution when the group mean functions are not equal, i.e.,  $\delta \neq 0$  ( $M = 80$ ,  $\mathbf{n}_1 = (10, 10, 10, 10)$ ,  $\mathbf{n}_3 = (10, 20, 15, 30)$ ,  $nr = 1000$ ,  $nboot = 10,000$  and  $\alpha = 5\%$ ). For  $M = 150$ , the results were very similar, and, therefore, they are omitted. See also Figure 10.

| n              | $\rho$ | $\delta$ | Test             |                  |                  |      |      |      |      |      |       |
|----------------|--------|----------|------------------|------------------|------------------|------|------|------|------|------|-------|
|                |        |          | L <sup>2</sup> N | L <sup>2</sup> B | L <sup>2</sup> b | FN   | FB   | Fb   | GPF  | GPFb | Fmaxb |
| n <sub>1</sub> | 0.1    | 0.2      | 1.73             | 1.92             | 2.37             | 1.57 | 1.58 | 1.57 | 1.75 | 1.58 | 1.48  |
|                |        | 0.4      | 2.02             | 2.15             | 2.52             | 1.72 | 1.73 | 1.78 | 1.97 | 1.75 | 1.60  |
|                |        | 0.6      | 2.12             | 2.35             | 2.60             | 1.90 | 1.92 | 1.92 | 2.05 | 1.87 | 1.83  |
|                |        | 0.8      | 1.85             | 2.02             | 2.28             | 1.47 | 1.50 | 1.50 | 1.83 | 1.57 | 1.60  |
|                |        | 1.0      | 2.15             | 2.33             | 2.67             | 1.88 | 1.92 | 1.87 | 2.10 | 1.88 | 1.83  |
|                | 0.5    | 0.2      | 1.90             | 2.13             | 2.55             | 1.75 | 1.88 | 1.77 | 2.08 | 1.80 | 1.98  |
|                |        | 0.4      | 2.05             | 2.4              | 2.67             | 1.90 | 2.10 | 1.93 | 2.32 | 1.95 | 1.78  |
|                |        | 0.6      | 1.82             | 2.08             | 2.40             | 1.63 | 1.80 | 1.65 | 1.92 | 1.77 | 1.80  |
|                |        | 0.8      | 1.92             | 2.23             | 2.60             | 1.73 | 1.93 | 1.75 | 2.15 | 1.92 | 1.88  |
|                |        | 1.0      | 2.07             | 2.28             | 2.68             | 1.93 | 2.03 | 1.98 | 2.23 | 2.02 | 1.82  |
|                | 0.9    | 0.2      | 1.30             | 2.00             | 2.33             | 1.22 | 1.77 | 1.20 | 1.68 | 1.38 | 2.00  |
|                |        | 0.4      | 1.53             | 2.03             | 2.38             | 1.33 | 1.93 | 1.30 | 1.88 | 1.47 | 1.87  |
|                |        | 0.6      | 1.60             | 2.15             | 2.28             | 1.47 | 2.02 | 1.47 | 1.87 | 1.47 | 1.70  |
|                |        | 0.8      | 1.10             | 1.70             | 2.08             | 0.98 | 1.55 | 0.98 | 1.53 | 1.18 | 1.77  |
|                |        | 1.0      | 1.23             | 1.85             | 2.27             | 1.18 | 1.73 | 1.18 | 1.63 | 1.38 | 1.78  |
| n <sub>3</sub> | 0.1    | 0.2      | 1.57             | 1.67             | 1.85             | 1.42 | 1.42 | 1.47 | 1.57 | 1.47 | 1.47  |
|                |        | 0.4      | 1.97             | 2.12             | 2.28             | 1.78 | 1.80 | 1.78 | 1.95 | 1.78 | 1.85  |
|                |        | 0.6      | 1.67             | 1.78             | 1.95             | 1.57 | 1.57 | 1.62 | 1.65 | 1.58 | 1.72  |
|                |        | 0.8      | 1.70             | 1.88             | 2.03             | 1.58 | 1.58 | 1.63 | 1.73 | 1.65 | 1.53  |
|                |        | 1.0      | 2.02             | 2.15             | 2.30             | 1.87 | 1.90 | 1.88 | 2.05 | 1.88 | 1.75  |
|                | 0.5    | 0.2      | 1.65             | 1.78             | 2.00             | 1.62 | 1.67 | 1.60 | 1.73 | 1.58 | 1.60  |
|                |        | 0.4      | 1.65             | 1.80             | 2.15             | 1.52 | 1.65 | 1.60 | 1.72 | 1.60 | 1.72  |
|                |        | 0.6      | 1.75             | 1.85             | 1.98             | 1.68 | 1.75 | 1.68 | 1.85 | 1.73 | 1.67  |
|                |        | 0.8      | 1.85             | 2.02             | 2.30             | 1.80 | 1.83 | 1.8  | 1.97 | 1.87 | 1.77  |
|                |        | 1.0      | 1.75             | 1.83             | 1.97             | 1.70 | 1.75 | 1.68 | 1.80 | 1.67 | 1.72  |
|                | 0.9    | 0.2      | 1.40             | 1.93             | 2.08             | 1.33 | 1.80 | 1.35 | 1.68 | 1.48 | 1.58  |
|                |        | 0.4      | 1.48             | 1.82             | 1.90             | 1.42 | 1.73 | 1.37 | 1.62 | 1.37 | 1.75  |
|                |        | 0.6      | 1.43             | 1.68             | 1.83             | 1.35 | 1.63 | 1.32 | 1.47 | 1.28 | 1.78  |
|                |        | 0.8      | 1.45             | 1.83             | 1.97             | 1.38 | 1.72 | 1.37 | 1.63 | 1.47 | 1.48  |
|                |        | 1.0      | 1.12             | 1.43             | 1.68             | 1.08 | 1.35 | 1.10 | 1.42 | 1.15 | 1.77  |

Table 20: Comparisonwise error rates (as percentages) of the tests obtained under Model 1 and  $t$ -distribution  $t_4/\sqrt{2}$  when the group mean functions are not equal, i.e.,  $\delta \neq 0$  ( $M = 80$ ,  $\mathbf{n}_1 = (10, 10, 10, 10)$ ,  $\mathbf{n}_3 = (10, 20, 15, 30)$ ,  $nr = 1000$ ,  $nboot = 10,000$  and  $\alpha = 5\%$ ). For  $M = 150$ , the results were very similar, and, therefore, they are omitted. See also Figure 10.

| n              | $\rho$ | $\delta$ | Test             |                  |                  |      |      |      |      |      |       |
|----------------|--------|----------|------------------|------------------|------------------|------|------|------|------|------|-------|
|                |        |          | L <sup>2</sup> N | L <sup>2</sup> B | L <sup>2</sup> b | FN   | FB   | Fb   | GPF  | GPFb | Fmaxb |
| n <sub>1</sub> | 0.1    | 0.2      | 1.80             | 2.07             | 2.25             | 1.67 | 1.67 | 1.70 | 1.80 | 1.72 | 1.75  |
|                |        | 0.4      | 1.85             | 2.05             | 2.20             | 1.67 | 1.67 | 1.77 | 1.83 | 1.73 | 1.68  |
|                |        | 0.6      | 2.03             | 2.17             | 2.40             | 1.83 | 1.83 | 1.87 | 1.98 | 1.83 | 1.80  |
|                |        | 0.8      | 1.98             | 2.22             | 2.48             | 1.72 | 1.73 | 1.82 | 1.95 | 1.75 | 1.65  |
|                |        | 1.0      | 1.92             | 2.13             | 2.42             | 1.77 | 1.80 | 1.73 | 1.97 | 1.77 | 1.80  |
|                | 0.5    | 0.2      | 1.57             | 1.78             | 2.12             | 1.48 | 1.55 | 1.53 | 1.70 | 1.45 | 1.47  |
|                |        | 0.4      | 2.00             | 2.32             | 2.63             | 1.87 | 2.02 | 1.88 | 2.22 | 1.95 | 2.00  |
|                |        | 0.6      | 1.83             | 2.08             | 2.32             | 1.65 | 1.85 | 1.78 | 1.87 | 1.67 | 1.52  |
|                |        | 0.8      | 1.57             | 1.85             | 2.12             | 1.43 | 1.58 | 1.43 | 1.97 | 1.70 | 1.63  |
|                |        | 1.0      | 1.63             | 1.87             | 2.27             | 1.42 | 1.60 | 1.48 | 1.78 | 1.47 | 1.63  |
|                | 0.9    | 0.2      | 1.13             | 1.57             | 1.77             | 1.10 | 1.43 | 1.07 | 1.35 | 1.15 | 1.37  |
|                |        | 0.4      | 1.18             | 1.87             | 2.08             | 1.05 | 1.62 | 1.10 | 1.62 | 1.13 | 1.63  |
|                |        | 0.6      | 1.17             | 1.82             | 1.95             | 1.00 | 1.60 | 0.97 | 1.50 | 1.05 | 1.72  |
|                |        | 0.8      | 1.22             | 1.78             | 1.95             | 1.17 | 1.62 | 1.15 | 1.65 | 1.33 | 1.63  |
|                |        | 1.0      | 1.18             | 1.67             | 1.95             | 1.12 | 1.50 | 1.08 | 1.47 | 1.20 | 1.65  |
| n <sub>3</sub> | 0.1    | 0.2      | 1.62             | 1.72             | 1.78             | 1.55 | 1.55 | 1.53 | 1.60 | 1.55 | 1.50  |
|                |        | 0.4      | 1.65             | 1.73             | 1.83             | 1.55 | 1.55 | 1.60 | 1.67 | 1.60 | 1.63  |
|                |        | 0.6      | 1.50             | 1.60             | 1.67             | 1.47 | 1.47 | 1.42 | 1.52 | 1.43 | 1.43  |
|                |        | 0.8      | 2.08             | 2.18             | 2.37             | 1.92 | 1.97 | 1.92 | 2.05 | 1.88 | 2.00  |
|                |        | 1.0      | 1.82             | 1.93             | 2.00             | 1.67 | 1.68 | 1.72 | 1.80 | 1.73 | 1.72  |
|                | 0.5    | 0.2      | 1.35             | 1.52             | 1.67             | 1.28 | 1.40 | 1.28 | 1.52 | 1.38 | 1.38  |
|                |        | 0.4      | 1.78             | 1.92             | 2.00             | 1.70 | 1.77 | 1.75 | 1.95 | 1.73 | 1.52  |
|                |        | 0.6      | 1.70             | 1.85             | 1.97             | 1.65 | 1.70 | 1.62 | 1.87 | 1.67 | 1.52  |
|                |        | 0.8      | 1.82             | 1.93             | 2.17             | 1.77 | 1.82 | 1.77 | 1.93 | 1.83 | 1.75  |
|                |        | 1.0      | 1.75             | 1.92             | 2.00             | 1.67 | 1.77 | 1.65 | 1.83 | 1.72 | 1.58  |
|                | 0.9    | 0.2      | 1.50             | 1.77             | 1.80             | 1.42 | 1.67 | 1.33 | 1.72 | 1.42 | 1.77  |
|                |        | 0.4      | 1.35             | 1.65             | 1.60             | 1.30 | 1.58 | 1.28 | 1.48 | 1.33 | 1.42  |
|                |        | 0.6      | 1.38             | 1.60             | 1.63             | 1.33 | 1.57 | 1.32 | 1.62 | 1.37 | 1.58  |
|                |        | 0.8      | 1.23             | 1.57             | 1.58             | 1.17 | 1.50 | 1.08 | 1.47 | 1.18 | 1.60  |
|                |        | 1.0      | 1.23             | 1.65             | 1.67             | 1.22 | 1.58 | 1.18 | 1.52 | 1.23 | 1.73  |



Table 21: Experimentwise power rates (as percentages) of the tests obtained under Model 1 and standard normal distribution ( $M = 80$ ,  $\delta \neq 0$ ,  $\mathbf{n}_1 = (10, 10, 10, 10)$ ,  $\mathbf{n}_3 = (10, 20, 15, 30)$ ,  $nr = 1000$ ,  $nboot = 10,000$  and  $\alpha = 5\%$ ). For  $M = 150$ , the results were very similar, and, therefore, they are omitted. See also Figure 11.

| $\mathbf{n}$   | $\rho$ | $\delta$ | Test             |                  |                  |      |      |      |      |      |       |
|----------------|--------|----------|------------------|------------------|------------------|------|------|------|------|------|-------|
|                |        |          | L <sup>2</sup> N | L <sup>2</sup> B | L <sup>2</sup> b | FN   | FB   | Fb   | GPF  | GPFb | Fmaxb |
| $\mathbf{n}_1$ | 0.1    | 0.2      | 22.9             | 24.6             | 27.2             | 19.0 | 19.5 | 20.2 | 22.3 | 20.4 | 87.9  |
|                |        | 0.4      | 99.2             | 99.2             | 99.6             | 98.8 | 98.8 | 98.7 | 99.2 | 98.9 | 100   |
|                |        | 0.6      | 100              | 100              | 100              | 100  | 100  | 100  | 100  | 100  | 100   |
|                |        | 0.8      | 100              | 100              | 100              | 100  | 100  | 100  | 100  | 100  | 100   |
|                |        | 1.0      | 100              | 100              | 100              | 100  | 100  | 100  | 100  | 100  | 100   |
|                | 0.5    | 0.2      | 0.4              | 0.5              | 0.7              | 0.4  | 0.4  | 0.4  | 0.4  | 0.3  | 0.4   |
|                |        | 0.4      | 8.5              | 10.5             | 12.4             | 7.9  | 8.5  | 8.0  | 10.5 | 8.4  | 21.4  |
|                |        | 0.6      | 45.7             | 49.1             | 52.3             | 43.9 | 45.8 | 43.7 | 50.5 | 45.7 | 80.7  |
|                |        | 0.8      | 86.1             | 87.4             | 89.7             | 84.5 | 86.2 | 84.9 | 87.1 | 85.6 | 99.0  |
|                |        | 1.0      | 98.5             | 99.0             | 99.3             | 98.2 | 98.5 | 98.2 | 98.4 | 98.2 | 100   |
|                | 0.9    | 0.2      | 0.0              | 0.0              | 0.0              | 0.0  | 0.0  | 0.0  | 0.0  | 0.0  | 0.0   |
|                |        | 0.4      | 0.6              | 0.8              | 0.9              | 0.3  | 0.7  | 0.3  | 0.7  | 0.4  | 0.3   |
|                |        | 0.6      | 3.4              | 5.2              | 6.9              | 3.3  | 4.9  | 3.2  | 4.4  | 3.5  | 1.8   |
|                |        | 0.8      | 13.5             | 19.4             | 21.5             | 12.2 | 17.3 | 12.2 | 16.8 | 13.5 | 6.9   |
|                |        | 1.0      | 37.6             | 45.0             | 48.9             | 36.9 | 43.3 | 36.6 | 39.9 | 35.0 | 20.1  |
| $\mathbf{n}_3$ | 0.1    | 0.2      | 44.4             | 46.5             | 49.2             | 42.4 | 42.6 | 42.6 | 45.3 | 43.7 | 98.4  |
|                |        | 0.4      | 100              | 100              | 100              | 100  | 100  | 100  | 100  | 100  | 100   |
|                |        | 0.6      | 100              | 100              | 100              | 100  | 100  | 100  | 100  | 100  | 100   |
|                |        | 0.8      | 100              | 100              | 100              | 100  | 100  | 100  | 100  | 100  | 100   |
|                |        | 1.0      | 100              | 100              | 100              | 100  | 100  | 100  | 100  | 100  | 100   |
|                | 0.5    | 0.2      | 1.7              | 2.0              | 2.6              | 1.6  | 1.7  | 1.7  | 1.9  | 1.7  | 2.3   |
|                |        | 0.4      | 29.6             | 30.6             | 32.3             | 28.6 | 29.6 | 28.8 | 31.1 | 29.4 | 53.3  |
|                |        | 0.6      | 78.2             | 79.2             | 81.0             | 77.5 | 78.0 | 77.6 | 80.5 | 78.9 | 97.0  |
|                |        | 0.8      | 97.4             | 97.5             | 97.7             | 97.3 | 97.4 | 97.4 | 98.0 | 97.7 | 100   |
|                |        | 1.0      | 100              | 100              | 100              | 100  | 100  | 100  | 100  | 100  | 100   |
|                | 0.9    | 0.2      | 0.0              | 0.0              | 0.0              | 0.0  | 0.0  | 0.0  | 0.0  | 0.0  | 0.0   |
|                |        | 0.4      | 1.8              | 3.1              | 3.3              | 1.8  | 2.6  | 1.8  | 2.9  | 2.4  | 0.4   |
|                |        | 0.6      | 13.4             | 15.2             | 16.1             | 12.8 | 14.8 | 12.9 | 14.0 | 12.6 | 5.4   |
|                |        | 0.8      | 41.4             | 44.4             | 45.5             | 40.5 | 43.6 | 40.3 | 41.9 | 39.3 | 24.1  |
|                |        | 1.0      | 75.8             | 79.1             | 80.0             | 74.9 | 78.3 | 74.6 | 77.3 | 75.6 | 52.3  |

Table 22: Experimentwise power rates (as percentages) of the tests obtained under Model 1 and  $t$ -distribution  $t_4/\sqrt{2}$  ( $M = 80$ ,  $\delta \neq 0$ ,  $\mathbf{n}_1 = (10, 10, 10, 10)$ ,  $\mathbf{n}_3 = (10, 20, 15, 30)$ ,  $nr = 1000$ ,  $nboot = 10,000$  and  $\alpha = 5\%$ ). For  $M = 150$ , the results were very similar, and, therefore, they are omitted. See also Figure 11.

| n              | $\rho$         | $\delta$ | Test             |                  |                  |      |      |      |      |      |       |      |
|----------------|----------------|----------|------------------|------------------|------------------|------|------|------|------|------|-------|------|
|                |                |          | L <sup>2</sup> N | L <sup>2</sup> B | L <sup>2</sup> b | FN   | FB   | Fb   | GPF  | GPFb | Fmaxb |      |
| n <sub>1</sub> | 0.1            | 0.2      | 27.8             | 29.0             | 31.4             | 25.3 | 25.8 | 25.9 | 27.7 | 26.4 | 84.3  |      |
|                |                | 0.4      | 96.9             | 97.5             | 97.9             | 95.8 | 95.8 | 96.2 | 96.8 | 96.3 | 100   |      |
|                |                | 0.6      | 99.4             | 99.5             | 99.5             | 99.4 | 99.4 | 99.4 | 99.4 | 99.4 | 100   |      |
|                |                | 0.8      | 100              | 100              | 100              | 100  | 100  | 100  | 100  | 100  | 100   |      |
|                |                | 1.0      | 99.9             | 99.9             | 99.9             | 99.9 | 99.9 | 99.9 | 99.9 | 99.9 | 100   |      |
|                | 0.5            | 0.2      | 0.7              | 1.1              | 1.4              | 0.6  | 0.7  | 0.7  | 0.8  | 0.6  | 0.8   |      |
|                |                | 0.4      | 11.6             | 12.9             | 14               | 10.5 | 11.7 | 10.8 | 13.3 | 11.2 | 24.5  |      |
|                |                | 0.6      | 52.3             | 55.2             | 58.4             | 50.4 | 52.2 | 51.3 | 54.8 | 52.4 | 80.1  |      |
|                |                | 0.8      | 84.9             | 86.9             | 88.3             | 84.0 | 84.8 | 84.6 | 87.9 | 85.9 | 98.0  |      |
|                |                | 1.0      | 96.8             | 96.9             | 97.4             | 96.6 | 96.7 | 96.6 | 97.3 | 97.2 | 99.7  |      |
|                | 0.9            | 0.2      | 0.1              | 0.2              | 0.2              | 0.1  | 0.1  | 0.1  | 0.2  | 0.2  | 0.1   |      |
|                |                | 0.4      | 0.5              | 0.7              | 0.8              | 0.5  | 0.6  | 0.4  | 0.8  | 0.6  | 0.3   |      |
|                |                | 0.6      | 3.5              | 5.4              | 6.3              | 3.3  | 4.9  | 3.3  | 4.6  | 3.1  | 1.4   |      |
|                |                | 0.8      | 13.5             | 18.8             | 20.5             | 12.4 | 16.6 | 12.4 | 16.9 | 13.4 | 8.4   |      |
|                |                | 1.0      | 35.5             | 42.1             | 44.2             | 34.1 | 39.8 | 34.2 | 38.6 | 34.1 | 22.5  |      |
|                | n <sub>3</sub> | 0.1      | 0.2              | 52.3             | 53.3             | 54.5 | 51.1 | 51.3 | 51.1 | 52.6 | 51.4  | 97.1 |
|                |                |          | 0.4              | 99.5             | 99.6             | 99.5 | 99.5 | 99.5 | 99.4 | 99.5 | 99.4  | 99.9 |
|                |                |          | 0.6              | 99.9             | 99.9             | 99.9 | 99.9 | 99.9 | 99.9 | 99.9 | 99.9  | 100  |
|                |                |          | 0.8              | 99.9             | 99.9             | 99.9 | 99.9 | 99.9 | 99.9 | 99.9 | 99.9  | 100  |
|                |                |          | 1.0              | 100              | 100              | 100  | 100  | 100  | 100  | 100  | 100   | 100  |
| 0.5            |                | 0.2      | 3.0              | 3.4              | 3.5              | 2.9  | 3.0  | 2.7  | 3.4  | 3.2  | 4.3   |      |
|                |                | 0.4      | 28.9             | 30.2             | 31.1             | 27.8 | 29.0 | 28.2 | 30.9 | 29.2 | 56.3  |      |
|                |                | 0.6      | 78.9             | 79.9             | 80.3             | 78.0 | 78.8 | 77.6 | 81.1 | 79.5 | 97.0  |      |
|                |                | 0.8      | 97.1             | 97.3             | 97.2             | 96.9 | 97.0 | 97.0 | 97.3 | 97.1 | 99.9  |      |
|                |                | 1.0      | 99.8             | 99.8             | 99.8             | 99.8 | 99.8 | 99.8 | 99.8 | 99.8 | 100   |      |
| 0.9            |                | 0.2      | 0.3              | 0.6              | 0.6              | 0.3  | 0.6  | 0.3  | 0.4  | 0.3  | 0.2   |      |
|                |                | 0.4      | 1.7              | 2.1              | 2.1              | 1.6  | 2.0  | 1.6  | 1.8  | 1.6  | 0.9   |      |
|                |                | 0.6      | 11.1             | 13.7             | 13.8             | 10.8 | 13.1 | 10.2 | 12.7 | 11.2 | 5.4   |      |
|                |                | 0.8      | 41.6             | 44.7             | 44.4             | 40.5 | 43.8 | 39.8 | 43.5 | 40.2 | 25.9  |      |
|                |                | 1.0      | 75.3             | 77.3             | 76.9             | 74.1 | 76.8 | 73.4 | 75.4 | 73.0 | 57.6  |      |

Table 23: Comparisonwise power rates (as percentages) of the tests obtained under Model 1 and standard normal distribution ( $M = 80$ ,  $\delta \neq 0$ ,  $\mathbf{n}_1 = (10, 10, 10, 10)$ ,  $\mathbf{n}_3 = (10, 20, 15, 30)$ ,  $nr = 1000$ ,  $nboot = 10,000$  and  $\alpha = 5\%$ ). For  $M = 150$ , the results were very similar, and, therefore, they are omitted. See also Figure 12.

| $\mathbf{n}$   | $\rho$ | $\delta$ | Test             |                  |                  |       |       |       |       |       |       |
|----------------|--------|----------|------------------|------------------|------------------|-------|-------|-------|-------|-------|-------|
|                |        |          | L <sup>2</sup> N | L <sup>2</sup> B | L <sup>2</sup> b | FN    | FB    | Fb    | GPF   | GPFb  | Fmaxb |
| $\mathbf{n}_1$ | 0.1    | 0.2      | 36.37            | 38.00            | 39.80            | 34.18 | 34.43 | 34.47 | 36.13 | 34.52 | 64.05 |
|                |        | 0.4      | 66.50            | 66.53            | 66.60            | 66.43 | 66.43 | 66.42 | 66.53 | 66.47 | 66.67 |
|                |        | 0.6      | 66.67            | 66.67            | 66.67            | 66.67 | 66.67 | 66.67 | 66.67 | 66.67 | 66.67 |
|                |        | 0.8      | 66.67            | 66.67            | 66.67            | 66.67 | 66.67 | 66.67 | 66.67 | 66.67 | 66.67 |
|                |        | 1.0      | 66.67            | 66.67            | 66.67            | 66.67 | 66.67 | 66.67 | 66.67 | 66.67 | 66.67 |
|                | 0.5    | 0.2      | 8.38             | 9.20             | 10.50            | 7.92  | 8.45  | 8.00  | 9.07  | 8.32  | 9.63  |
|                |        | 0.4      | 26.50            | 28.50            | 30.72            | 25.18 | 26.45 | 25.25 | 28.1  | 26.12 | 37.32 |
|                |        | 0.6      | 50.07            | 51.45            | 53.17            | 49.12 | 50.02 | 49.20 | 51.67 | 50.20 | 61.80 |
|                |        | 0.8      | 63.75            | 64.05            | 64.63            | 63.45 | 63.75 | 63.52 | 63.98 | 63.63 | 66.50 |
|                |        | 1.0      | 66.38            | 66.47            | 66.55            | 66.33 | 66.38 | 66.33 | 66.37 | 66.33 | 66.67 |
|                | 0.9    | 0.2      | 3.82             | 5.15             | 5.97             | 3.52  | 4.75  | 3.53  | 4.55  | 3.68  | 4.48  |
|                |        | 0.4      | 8.08             | 10.68            | 11.88            | 7.37  | 9.82  | 7.35  | 9.47  | 7.77  | 7.53  |
|                |        | 0.6      | 18.32            | 22.17            | 24.00            | 17.60 | 20.97 | 17.55 | 19.98 | 17.33 | 13.52 |
|                |        | 0.8      | 31.60            | 36.05            | 37.95            | 30.52 | 34.75 | 30.30 | 33.47 | 30.97 | 24.02 |
|                |        | 1.0      | 47.28            | 50.70            | 52.12            | 46.60 | 49.83 | 46.53 | 48.52 | 46.32 | 37.95 |
| $\mathbf{n}_3$ | 0.1    | 0.2      | 50.20            | 50.93            | 51.87            | 49.38 | 49.48 | 49.43 | 50.43 | 49.73 | 66.40 |
|                |        | 0.4      | 66.67            | 66.67            | 66.67            | 66.67 | 66.67 | 66.67 | 66.67 | 66.67 | 66.67 |
|                |        | 0.6      | 66.67            | 66.67            | 66.67            | 66.67 | 66.67 | 66.67 | 66.67 | 66.67 | 66.67 |
|                |        | 0.8      | 66.67            | 66.67            | 66.67            | 66.67 | 66.67 | 66.67 | 66.67 | 66.67 | 66.67 |
|                |        | 1.0      | 66.67            | 66.67            | 66.67            | 66.67 | 66.67 | 66.67 | 66.67 | 66.67 | 66.67 |
|                | 0.5    | 0.2      | 12.03            | 12.62            | 13.50            | 11.58 | 12.00 | 11.70 | 12.60 | 11.98 | 16.18 |
|                |        | 0.4      | 41.85            | 42.75            | 43.70            | 41.17 | 41.87 | 41.42 | 42.73 | 41.82 | 54.02 |
|                |        | 0.6      | 61.80            | 62.10            | 62.53            | 61.52 | 61.77 | 61.63 | 62.35 | 61.95 | 66.15 |
|                |        | 0.8      | 66.20            | 66.22            | 66.25            | 66.18 | 66.20 | 66.20 | 66.30 | 66.25 | 66.67 |
|                |        | 1.0      | 66.67            | 66.67            | 66.67            | 66.67 | 66.67 | 66.67 | 66.67 | 66.67 | 66.67 |
|                | 0.9    | 0.2      | 5.12             | 6.15             | 6.52             | 5.00  | 5.82  | 4.97  | 5.53  | 4.83  | 5.15  |
|                |        | 0.4      | 14.47            | 16.38            | 17.15            | 13.97 | 15.83 | 13.98 | 15.47 | 14.13 | 11.40 |
|                |        | 0.6      | 31.70            | 33.58            | 34.40            | 31.32 | 33.03 | 31.23 | 32.85 | 31.32 | 24.47 |
|                |        | 0.8      | 49.63            | 51.28            | 51.85            | 49.25 | 50.78 | 49.20 | 50.15 | 48.88 | 41.40 |
|                |        | 1.0      | 61.00            | 61.85            | 62.12            | 60.80 | 61.70 | 60.70 | 61.43 | 60.95 | 55.12 |

Table 24: Comparisonwise power rates (as percentages) of the tests obtained under Model 1 and  $t$ -distribution  $t_4/\sqrt{2}$  ( $M = 80$ ,  $\delta \neq 0$ ,  $\mathbf{n}_1 = (10, 10, 10, 10)$ ,  $\mathbf{n}_3 = (10, 20, 15, 30)$ ,  $nr = 1000$ ,  $nboot = 10,000$  and  $\alpha = 5\%$ ). For  $M = 150$ , the results were very similar, and, therefore, they are omitted. See also Figure 12.

| $\mathbf{n}$   | $\rho$ | $\delta$ | Test             |                  |                  |       |       |       |       |       |       |
|----------------|--------|----------|------------------|------------------|------------------|-------|-------|-------|-------|-------|-------|
|                |        |          | L <sup>2</sup> N | L <sup>2</sup> B | L <sup>2</sup> b | FN    | FB    | Fb    | GPF   | GPFb  | Fmaxb |
| $\mathbf{n}_1$ | 0.1    | 0.2      | 38.23            | 39.30            | 40.80            | 36.57 | 36.77 | 37.07 | 38.35 | 37.22 | 62.63 |
|                |        | 0.4      | 65.78            | 65.92            | 66.03            | 65.57 | 65.58 | 65.67 | 65.77 | 65.63 | 66.67 |
|                |        | 0.6      | 66.50            | 66.53            | 66.52            | 66.47 | 66.47 | 66.50 | 66.48 | 66.48 | 66.67 |
|                |        | 0.8      | 66.67            | 66.67            | 66.67            | 66.67 | 66.67 | 66.67 | 66.67 | 66.67 | 66.67 |
|                |        | 1.0      | 66.63            | 66.63            | 66.63            | 66.63 | 66.63 | 66.63 | 66.63 | 66.63 | 66.67 |
|                | 0.5    | 0.2      | 8.80             | 9.68             | 10.75            | 8.03  | 8.82  | 8.33  | 9.43  | 8.67  | 10.38 |
|                |        | 0.4      | 26.85            | 28.62            | 30.43            | 25.50 | 26.73 | 25.90 | 28.65 | 26.83 | 37.98 |
|                |        | 0.6      | 50.97            | 52.08            | 53.38            | 50.25 | 50.85 | 50.60 | 52.05 | 51.07 | 61.13 |
|                |        | 0.8      | 62.63            | 63.25            | 63.68            | 62.35 | 62.53 | 62.55 | 63.42 | 63.00 | 66.25 |
|                |        | 1.0      | 65.88            | 65.90            | 66.02            | 65.73 | 65.8  | 65.83 | 65.98 | 65.97 | 66.62 |
|                | 0.9    | 0.2      | 3.22             | 4.53             | 5.00             | 2.88  | 4.02  | 2.87  | 4.02  | 3.32  | 3.75  |
|                |        | 0.4      | 7.73             | 10.15            | 11.07            | 7.35  | 9.35  | 7.30  | 9.45  | 7.97  | 7.85  |
|                |        | 0.6      | 16.63            | 20.23            | 21.33            | 15.90 | 19.12 | 15.82 | 18.78 | 16.55 | 14.73 |
|                |        | 0.8      | 30.92            | 35.03            | 36.23            | 30.10 | 33.62 | 29.98 | 33.62 | 30.60 | 26.03 |
|                |        | 1.0      | 44.95            | 48.42            | 49.28            | 43.92 | 47.13 | 43.95 | 46.85 | 44.53 | 38.53 |
| $\mathbf{n}_3$ | 0.1    | 0.2      | 51.57            | 52.00            | 52.47            | 51.00 | 51.10 | 51.22 | 51.53 | 51.18 | 65.95 |
|                |        | 0.4      | 66.52            | 66.53            | 66.52            | 66.52 | 66.52 | 66.50 | 66.52 | 66.5  | 66.65 |
|                |        | 0.6      | 66.63            | 66.65            | 66.63            | 66.63 | 66.63 | 66.63 | 66.63 | 66.63 | 66.67 |
|                |        | 0.8      | 66.62            | 66.63            | 66.62            | 66.62 | 66.62 | 66.62 | 66.62 | 66.62 | 66.67 |
|                |        | 1.0      | 66.67            | 66.67            | 66.67            | 66.67 | 66.67 | 66.67 | 66.67 | 66.67 | 66.67 |
|                | 0.5    | 0.2      | 13.25            | 13.82            | 14.28            | 12.98 | 13.22 | 12.93 | 13.85 | 13.18 | 17.18 |
|                |        | 0.4      | 42.20            | 42.92            | 43.47            | 41.65 | 42.20 | 41.82 | 43.27 | 42.47 | 55.18 |
|                |        | 0.6      | 61.52            | 61.78            | 61.93            | 61.25 | 61.47 | 61.23 | 62.12 | 61.72 | 66.05 |
|                |        | 0.8      | 65.95            | 66.02            | 65.97            | 65.88 | 65.90 | 65.93 | 66.00 | 65.97 | 66.60 |
|                |        | 1.0      | 66.62            | 66.62            | 66.62            | 66.62 | 66.62 | 66.62 | 66.62 | 66.62 | 66.67 |
|                | 0.9    | 0.2      | 5.90             | 6.97             | 7.07             | 5.58  | 6.78  | 5.47  | 6.48  | 5.67  | 5.52  |
|                |        | 0.4      | 13.78            | 15.25            | 15.32            | 13.43 | 14.82 | 13.23 | 14.68 | 13.58 | 11.25 |
|                |        | 0.6      | 30.58            | 32.70            | 32.82            | 30.25 | 32.23 | 29.83 | 31.92 | 30.13 | 25.23 |
|                |        | 0.8      | 48.68            | 50.28            | 50.23            | 48.33 | 49.82 | 47.98 | 49.67 | 48.27 | 42.65 |
|                |        | 1.0      | 60.60            | 61.13            | 61.03            | 60.32 | 61.00 | 60.18 | 60.82 | 60.20 | 56.20 |

Table 25: The ACD power rates (as percentages) of the tests obtained under Model 1 and standard normal distribution ( $M = 80$ ,  $\delta \neq 0$ ,  $\mathbf{n}_1 = (10, 10, 10, 10)$ ,  $\mathbf{n}_3 = (10, 20, 15, 30)$ ,  $nr = 1000$ ,  $nboot = 10,000$  and  $\alpha = 5\%$ ). For  $M = 150$ , the results were very similar, and, therefore, they are omitted. See also Figure 13.

| $\mathbf{n}$   | $\rho$ | $\delta$ | Test             |                  |                  |      |      |      |      |      |       |
|----------------|--------|----------|------------------|------------------|------------------|------|------|------|------|------|-------|
|                |        |          | L <sup>2</sup> N | L <sup>2</sup> B | L <sup>2</sup> b | FN   | FB   | Fb   | GPF  | GPFb | Fmaxb |
| $\mathbf{n}_1$ | 0.1    | 0.2      | 21.7             | 23.1             | 25.6             | 18.3 | 22.0 | 19.4 | 21.1 | 19.4 | 81.6  |
|                |        | 0.4      | 87.9             | 87.2             | 85.5             | 89.0 | 89.3 | 88.6 | 88.3 | 89.1 | 91.0  |
|                |        | 0.6      | 87.6             | 86.6             | 85.3             | 88.9 | 88.8 | 88.8 | 88.0 | 89.1 | 89.3  |
|                |        | 0.8      | 89.2             | 88.4             | 86.9             | 91.4 | 91.2 | 91.2 | 89.2 | 90.8 | 90.5  |
|                |        | 1.0      | 87.6             | 86.6             | 84.9             | 89.0 | 88.9 | 89.1 | 88.0 | 89.2 | 89.3  |
|                | 0.5    | 0.2      | 0.2              | 0.2              | 0.4              | 0.3  | 0.5  | 0.3  | 0.2  | 0.3  | 0.3   |
|                |        | 0.4      | 8.0              | 9.8              | 11.3             | 7.4  | 10.9 | 7.5  | 10.0 | 8.0  | 20.0  |
|                |        | 0.6      | 41.3             | 43.7             | 45.2             | 39.8 | 45.8 | 39.7 | 45.1 | 41.4 | 72.9  |
|                |        | 0.8      | 77.7             | 77.2             | 77.4             | 77.0 | 80.0 | 77.2 | 77.6 | 77.4 | 88.3  |
|                |        | 1.0      | 87.2             | 86.4             | 84.3             | 87.6 | 87.5 | 87.4 | 86.6 | 87.2 | 89.6  |
|                | 0.9    | 0.2      | 0.0              | 0.0              | 0.0              | 0.0  | 0.1  | 0.0  | 0.0  | 0.0  | 0.0   |
|                |        | 0.4      | 0.6              | 0.8              | 0.9              | 0.3  | 1.3  | 0.3  | 0.7  | 0.4  | 0.3   |
|                |        | 0.6      | 3.0              | 4.4              | 5.8              | 2.9  | 6.3  | 2.8  | 3.8  | 3.1  | 1.4   |
|                |        | 0.8      | 12.3             | 17.0             | 17.8             | 11.0 | 19.5 | 11.0 | 14.3 | 11.8 | 5.7   |
|                |        | 1.0      | 34.8             | 40.2             | 42.7             | 34.3 | 45.0 | 34.0 | 36.1 | 32.1 | 17.6  |
| $\mathbf{n}_3$ | 0.1    | 0.2      | 41.7             | 43.3             | 45.3             | 40.3 | 49.9 | 40.4 | 42.7 | 41.2 | 90.7  |
|                |        | 0.4      | 88.4             | 87.5             | 86.5             | 89.5 | 89.4 | 89.5 | 88.5 | 89.5 | 89.1  |
|                |        | 0.6      | 90.5             | 89.8             | 89.0             | 91.1 | 91.1 | 90.8 | 90.6 | 91.0 | 90.0  |
|                |        | 0.8      | 90.1             | 89.2             | 88.4             | 90.8 | 90.8 | 90.6 | 90.0 | 90.5 | 91.0  |
|                |        | 1.0      | 88.3             | 87.5             | 86.7             | 89.1 | 88.9 | 89.0 | 88.1 | 89.0 | 89.6  |
|                | 0.5    | 0.2      | 1.6              | 1.8              | 2.3              | 1.5  | 2.1  | 1.6  | 1.7  | 1.6  | 2.1   |
|                |        | 0.4      | 27.7             | 28.2             | 29.3             | 26.7 | 34.7 | 26.8 | 29.0 | 27.6 | 48.9  |
|                |        | 0.6      | 72.1             | 72.6             | 73.8             | 71.7 | 80.2 | 71.9 | 73.6 | 72.5 | 88.5  |
|                |        | 0.8      | 87.9             | 87.1             | 85.9             | 88.1 | 89.1 | 88.2 | 87.8 | 88.1 | 89.7  |
|                |        | 1.0      | 89.8             | 89.3             | 88.5             | 90.1 | 89.8 | 90.2 | 89.5 | 90.3 | 89.8  |
|                | 0.9    | 0.2      | 0.0              | 0.0              | 0.0              | 0.0  | 0.0  | 0.0  | 0.0  | 0.0  | 0.0   |
|                |        | 0.4      | 1.6              | 2.5              | 2.6              | 1.6  | 3.0  | 1.6  | 2.6  | 2.1  | 0.3   |
|                |        | 0.6      | 12.6             | 14.2             | 15.0             | 12.0 | 18.5 | 12.1 | 13.3 | 11.9 | 4.8   |
|                |        | 0.8      | 37.7             | 39.4             | 40.2             | 36.9 | 49.6 | 36.9 | 37.4 | 35.3 | 22.0  |
|                |        | 1.0      | 70.8             | 72.7             | 72.3             | 70.1 | 80.1 | 69.6 | 71.0 | 70.6 | 45.2  |

Table 26: The ACD power rates (as percentages) of the tests obtained under Model 1 and  $t$ -distribution  $t_4/\sqrt{2}$  ( $M = 80$ ,  $\delta \neq 0$ ,  $\mathbf{n}_1 = (10, 10, 10, 10)$ ,  $\mathbf{n}_3 = (10, 20, 15, 30)$ ,  $nr = 1000$ ,  $nboot = 10,000$  and  $\alpha = 5\%$ ). For  $M = 150$ , the results were very similar, and, therefore, they are omitted. See also Figure 13.

| n              | $\rho$         | $\delta$ | Test             |                  |                  |      |      |      |      |      |       |      |
|----------------|----------------|----------|------------------|------------------|------------------|------|------|------|------|------|-------|------|
|                |                |          | L <sup>2</sup> N | L <sup>2</sup> B | L <sup>2</sup> b | FN   | FB   | Fb   | GPF  | GPFb | Fmaxb |      |
| n <sub>1</sub> | 0.1            | 0.2      | 26.7             | 27.6             | 29.8             | 24.4 | 28.3 | 24.8 | 26.6 | 25.5 | 77.0  |      |
|                |                | 0.4      | 86.4             | 85.9             | 85.4             | 86.6 | 87.0 | 86.3 | 86.4 | 86.5 | 90.2  |      |
|                |                | 0.6      | 87.6             | 87.0             | 85.6             | 88.7 | 88.7 | 88.5 | 87.9 | 88.7 | 89.5  |      |
|                |                | 0.8      | 88.6             | 87.3             | 85.9             | 90.0 | 89.9 | 89.5 | 88.7 | 89.8 | 90.2  |      |
|                |                | 1.0      | 88.7             | 87.4             | 85.8             | 89.5 | 89.3 | 89.8 | 88.3 | 89.5 | 89.5  |      |
|                | 0.5            | 0.2      | 0.7              | 1.1              | 1.4              | 0.6  | 1.1  | 0.7  | 0.8  | 0.6  | 0.7   |      |
|                |                | 0.4      | 11.1             | 12.0             | 12.9             | 10.1 | 12.9 | 10.3 | 12.2 | 10.6 | 22.9  |      |
|                |                | 0.6      | 47.9             | 49.9             | 52.2             | 46.6 | 52.0 | 47.2 | 50.5 | 48.7 | 74.0  |      |
|                |                | 0.8      | 77.8             | 78.2             | 78.3             | 77.9 | 79.4 | 78.5 | 78.3 | 77.8 | 88.7  |      |
|                |                | 1.0      | 87.5             | 86.3             | 84.4             | 88.4 | 88.3 | 88.0 | 86.9 | 88.7 | 90.2  |      |
|                | 0.9            | 0.2      | 0.1              | 0.2              | 0.2              | 0.1  | 0.2  | 0.1  | 0.2  | 0.2  | 0.1   |      |
|                |                | 0.4      | 0.5              | 0.7              | 0.7              | 0.5  | 0.7  | 0.4  | 0.8  | 0.6  | 0.3   |      |
|                |                | 0.6      | 3.2              | 4.6              | 5.2              | 3.0  | 5.8  | 3.0  | 4.0  | 2.9  | 1.1   |      |
|                |                | 0.8      | 12.2             | 16.2             | 17.5             | 11.1 | 20.1 | 11.2 | 15.1 | 12.2 | 7.6   |      |
|                |                | 1.0      | 32.6             | 37.4             | 38.2             | 31.4 | 41.6 | 31.5 | 34.8 | 31.0 | 20.2  |      |
|                | n <sub>3</sub> | 0.1      | 0.2              | 48.5             | 49.3             | 50.1 | 47.6 | 56.3 | 47.6 | 48.7 | 47.9  | 89.0 |
|                |                |          | 0.4              | 89.9             | 89.6             | 89.0 | 90.5 | 90.7 | 90.2 | 89.8 | 90.2  | 90.4 |
|                |                |          | 0.6              | 91.2             | 90.6             | 90.2 | 91.4 | 91.4 | 91.7 | 91.1 | 91.6  | 91.6 |
|                |                |          | 0.8              | 87.8             | 87.2             | 86.2 | 88.7 | 88.4 | 88.7 | 88.0 | 88.9  | 88.1 |
|                |                |          | 1.0              | 89.3             | 88.6             | 88.2 | 90.1 | 90.0 | 89.9 | 89.4 | 89.8  | 89.8 |
| 0.5            |                | 0.2      | 2.7              | 3.0              | 3.1              | 2.6  | 3.8  | 2.4  | 3.0  | 2.8  | 3.9   |      |
|                |                | 0.4      | 26.8             | 28.0             | 28.6             | 25.8 | 33.6 | 26.2 | 28.8 | 27.5 | 52.0  |      |
|                |                | 0.6      | 71.6             | 72.1             | 71.9             | 71.0 | 78.7 | 70.8 | 73.2 | 72.6 | 88.6  |      |
|                |                | 0.8      | 87.6             | 87.0             | 85.8             | 87.7 | 88.3 | 87.9 | 87.2 | 87.5 | 89.7  |      |
|                |                | 1.0      | 89.7             | 88.8             | 88.3             | 90.2 | 89.7 | 90.3 | 89.2 | 89.9 | 90.6  |      |
| 0.9            |                | 0.2      | 0.2              | 0.4              | 0.4              | 0.2  | 0.4  | 0.2  | 0.3  | 0.3  | 0.1   |      |
|                |                | 0.4      | 1.4              | 1.7              | 1.7              | 1.4  | 2.3  | 1.4  | 1.4  | 1.4  | 0.6   |      |
|                |                | 0.6      | 9.4              | 11.1             | 11.3             | 9.3  | 15.6 | 8.8  | 10.2 | 9.2  | 4.5   |      |
|                |                | 0.8      | 37.8             | 39.8             | 39.2             | 37.0 | 50.9 | 36.5 | 39.1 | 37.1 | 22.5  |      |
|                |                | 1.0      | 69.7             | 69.7             | 69.0             | 68.7 | 77.1 | 68.1 | 68.6 | 67.8 | 50.6  |      |

Table 27: Experimentwise (E) and comparisonwise (C) error rates (as percentages) of the tests obtained under Model 2. The column H refers to the situations of equal group mean functions (E) and unequal ones (U). In the column Case, “N” and “LN” refer to the normal and log-normal case, respectively. Moreover  $\mathbf{n}_1 = (10, 10, 10, 10)$ ,  $\mathbf{n}_2 = (20, 20, 20, 20)$ ,  $\mathbf{n}_3 = (10, 20, 15, 30)$ ,  $nr = 1000$ ,  $nboot = 10,000$  and  $\alpha = 5\%$ . See also Figures 14 and 15.

| H | Error rate | Case | $\mathbf{n}$   | $M$ | Test             |                  |                  |      |      |      |      |      |       |
|---|------------|------|----------------|-----|------------------|------------------|------------------|------|------|------|------|------|-------|
|   |            |      |                |     | L <sup>2</sup> N | L <sup>2</sup> B | L <sup>2</sup> b | FN   | FB   | Fb   | GPF  | GPFb | Fmaxb |
| E | E          | N    | $\mathbf{n}_1$ | 40  | 23.1             | 25.1             | 28.2             | 20.5 | 20.9 | 20.7 | 23.6 | 21.7 | 22.3  |
|   |            |      |                | 80  | 18.8             | 20.8             | 24.0             | 17.5 | 17.8 | 17.7 | 20.0 | 18.5 | 19.6  |
|   |            |      | $\mathbf{n}_2$ | 40  | 20.2             | 21.4             | 22.4             | 19.1 | 19.6 | 19.7 | 22.2 | 21.3 | 23.7  |
|   |            |      |                | 80  | 20.8             | 21.9             | 23.2             | 19.3 | 19.5 | 19.9 | 22.7 | 21.3 | 20.3  |
|   |            |      | $\mathbf{n}_3$ | 40  | 20.8             | 21.6             | 23.0             | 19.3 | 19.6 | 19.3 | 21.0 | 19.8 | 22.9  |
|   |            |      |                | 80  | 21.3             | 22.4             | 23.9             | 20.7 | 20.8 | 20.9 | 21.3 | 20.0 | 21.7  |
|   |            | LN   | $\mathbf{n}_1$ | 40  | 23.7             | 25.0             | 28.4             | 21.8 | 23.4 | 22.2 | 22.4 | 20.4 | 19.3  |
|   |            |      |                | 80  | 23.8             | 25.4             | 28.6             | 22.3 | 23.4 | 22.6 | 23.9 | 21.3 | 24.1  |
|   |            |      | $\mathbf{n}_2$ | 40  | 20.9             | 21.8             | 24.1             | 19.6 | 20.6 | 20.1 | 22.4 | 21.5 | 23.2  |
|   |            |      |                | 80  | 20.2             | 21.6             | 23.0             | 19.5 | 20.2 | 19.9 | 20.0 | 19.5 | 21.7  |
|   |            |      | $\mathbf{n}_3$ | 40  | 19.8             | 21.2             | 23.4             | 19.2 | 19.6 | 19.5 | 21.3 | 20.3 | 22.6  |
|   |            |      |                | 80  | 20.7             | 21.4             | 22.9             | 20.0 | 20.5 | 20.1 | 21.0 | 20.3 | 21.2  |
|   | C          | N    | $\mathbf{n}_1$ | 40  | 5.90             | 6.73             | 7.55             | 5.02 | 5.23 | 5.13 | 5.87 | 5.37 | 5.17  |
|   |            |      |                | 80  | 4.97             | 5.73             | 6.53             | 4.42 | 4.65 | 4.53 | 5.20 | 4.65 | 4.68  |
|   |            |      | $\mathbf{n}_2$ | 40  | 4.98             | 5.33             | 5.73             | 4.73 | 4.83 | 4.82 | 5.43 | 5.12 | 5.42  |
|   |            |      |                | 80  | 5.23             | 5.53             | 5.93             | 4.92 | 4.97 | 5.05 | 5.52 | 5.22 | 4.60  |
|   |            |      | $\mathbf{n}_3$ | 40  | 5.38             | 5.72             | 6.22             | 4.93 | 5.00 | 4.97 | 5.33 | 5.00 | 5.53  |
|   |            |      |                | 80  | 5.37             | 5.67             | 6.10             | 5.05 | 5.13 | 5.12 | 5.30 | 4.95 | 5.30  |
|   |            | LN   | $\mathbf{n}_1$ | 40  | 5.87             | 6.45             | 7.45             | 5.25 | 5.78 | 5.40 | 5.70 | 4.98 | 4.72  |
|   |            |      |                | 80  | 6.07             | 6.57             | 7.73             | 5.70 | 5.98 | 5.75 | 6.23 | 5.43 | 5.48  |
|   |            |      | $\mathbf{n}_2$ | 40  | 5.17             | 5.45             | 6.05             | 4.83 | 5.12 | 4.97 | 5.43 | 5.12 | 5.20  |
|   |            |      |                | 80  | 5.23             | 5.60             | 6.15             | 4.97 | 5.23 | 5.08 | 5.28 | 5.08 | 5.00  |
|   |            |      | $\mathbf{n}_3$ | 40  | 5.20             | 5.57             | 6.10             | 4.97 | 5.17 | 5.02 | 5.63 | 5.33 | 5.45  |
|   |            |      |                | 80  | 5.32             | 5.60             | 6.10             | 5.13 | 5.28 | 5.17 | 5.42 | 5.13 | 5.08  |
| U | E          | N    | $\mathbf{n}_1$ | 40  | 12.7             | 14.1             | 15.4             | 11.7 | 11.8 | 11.8 | 12.5 | 11.8 | 9.4   |
|   |            |      |                | 80  | 14.2             | 15.6             | 17.8             | 13.0 | 13.4 | 13.3 | 13.7 | 12.6 | 11.3  |
|   |            |      | $\mathbf{n}_2$ | 40  | 12.4             | 12.7             | 13.9             | 11.7 | 11.7 | 12.1 | 13.0 | 12.2 | 12.9  |
|   |            |      |                | 80  | 13.5             | 13.9             | 14.9             | 12.5 | 12.7 | 12.6 | 12.7 | 11.9 | 12.4  |
|   |            |      | $\mathbf{n}_3$ | 40  | 13.2             | 14.0             | 15.2             | 12.3 | 12.3 | 12.5 | 12.4 | 11.7 | 12.5  |
|   |            |      |                | 80  | 12.8             | 13.2             | 14.0             | 12.3 | 12.3 | 12.3 | 12.5 | 12.0 | 12.5  |
|   |            | LN   | $\mathbf{n}_1$ | 40  | 13.8             | 15.6             | 16.9             | 13.1 | 13.6 | 13.1 | 14.9 | 13.6 | 14.9  |
|   |            |      |                | 80  | 11.8             | 13.2             | 15.1             | 10.9 | 11.7 | 11.1 | 12.8 | 11.5 | 13.7  |
|   |            |      | $\mathbf{n}_2$ | 40  | 13.7             | 14.3             | 15.1             | 13.4 | 13.7 | 13.3 | 13.3 | 12.1 | 13.1  |
|   |            |      |                | 80  | 13.5             | 14.3             | 16.1             | 13.1 | 13.4 | 13.0 | 14.0 | 13.4 | 13.5  |
|   |            |      | $\mathbf{n}_3$ | 40  | 12.5             | 13.1             | 13.8             | 12.1 | 12.1 | 12.0 | 13.3 | 12.2 | 13.6  |
|   |            |      |                | 80  | 11.1             | 12.3             | 13.4             | 10.6 | 11.0 | 10.7 | 11.5 | 11.3 | 11.9  |
|   | C          | N    | $\mathbf{n}_1$ | 40  | 2.63             | 2.90             | 3.23             | 2.43 | 2.47 | 2.45 | 2.58 | 2.35 | 1.93  |
|   |            |      |                | 80  | 3.05             | 3.42             | 3.95             | 2.72 | 2.82 | 2.80 | 2.87 | 2.63 | 2.30  |
|   |            |      | $\mathbf{n}_2$ | 40  | 2.67             | 2.77             | 3.00             | 2.47 | 2.50 | 2.57 | 2.68 | 2.52 | 2.60  |
|   |            |      |                | 80  | 2.78             | 2.95             | 3.17             | 2.55 | 2.62 | 2.58 | 2.60 | 2.45 | 2.53  |
|   |            |      | $\mathbf{n}_3$ | 40  | 2.75             | 2.93             | 3.22             | 2.58 | 2.58 | 2.62 | 2.55 | 2.40 | 2.60  |
|   |            |      |                | 80  | 2.62             | 2.75             | 2.93             | 2.52 | 2.52 | 2.52 | 2.62 | 2.48 | 2.33  |
|   |            | LN   | $\mathbf{n}_1$ | 40  | 2.85             | 3.28             | 3.77             | 2.70 | 2.83 | 2.70 | 3.15 | 2.80 | 2.97  |
|   |            |      |                | 80  | 2.47             | 2.80             | 3.25             | 2.25 | 2.45 | 2.30 | 2.63 | 2.37 | 2.68  |
|   |            |      | $\mathbf{n}_2$ | 40  | 2.92             | 3.05             | 3.22             | 2.83 | 2.90 | 2.80 | 2.80 | 2.55 | 2.52  |
|   |            |      |                | 80  | 2.85             | 3.02             | 3.42             | 2.73 | 2.80 | 2.77 | 3.02 | 2.82 | 2.68  |
|   |            |      | $\mathbf{n}_3$ | 40  | 2.48             | 2.63             | 2.82             | 2.40 | 2.42 | 2.35 | 2.70 | 2.43 | 2.62  |
|   |            |      |                | 80  | 2.43             | 2.65             | 2.92             | 2.35 | 2.42 | 2.35 | 2.45 | 2.38 | 2.42  |

Table 28: Experimentwise (E), comparisonwise (C) and ACD power rates (as percentages) of the tests obtained under Model 2. In the column Case, “N” and “LN” refer to the normal and log-normal case, respectively. Moreover  $\mathbf{n}_1 = (10, 10, 10, 10)$ ,  $\mathbf{n}_2 = (20, 20, 20, 20)$ ,  $\mathbf{n}_3 = (10, 20, 15, 30)$ ,  $nr = 1000$ ,  $nboot = 10,000$  and  $\alpha = 5\%$ . See also Figure 16.

| Power<br>rate | Case | $\mathbf{n}$   | $M$ | Test             |                  |                  |      |      |      |      |      |       |
|---------------|------|----------------|-----|------------------|------------------|------------------|------|------|------|------|------|-------|
|               |      |                |     | L <sup>2</sup> N | L <sup>2</sup> B | L <sup>2</sup> b | FN   | FB   | Fb   | GPF  | GPFb | Fmaxb |
| E             | N    | $\mathbf{n}_1$ | 40  | 12.0             | 13.3             | 15.1             | 10.7 | 11.1 | 10.7 | 31.6 | 28.6 | 69.9  |
|               |      |                | 80  | 11.3             | 12.6             | 15.0             | 10.0 | 10.5 | 10.4 | 34.4 | 31.1 | 87.6  |
|               |      | $\mathbf{n}_2$ | 40  | 36.1             | 37.5             | 40.4             | 34.5 | 35.3 | 35.3 | 82.4 | 81.1 | 99.8  |
|               |      |                | 80  | 41.0             | 42.5             | 44.6             | 38.9 | 39.4 | 39.3 | 90.0 | 88.7 | 100   |
|               |      | $\mathbf{n}_3$ | 40  | 28.3             | 30.4             | 32.4             | 26.9 | 27.5 | 27.0 | 69.2 | 67.0 | 98.4  |
|               |      |                | 80  | 28.1             | 29.9             | 32.3             | 26.8 | 27.1 | 27.0 | 80.6 | 79.4 | 99.9  |
|               | LN   | $\mathbf{n}_1$ | 40  | 9.8              | 12.9             | 15.8             | 7.8  | 9.7  | 7.8  | 39.3 | 33.6 | 41.8  |
|               |      |                | 80  | 11.4             | 14.1             | 17.6             | 9.7  | 11.2 | 10.0 | 40.2 | 34.8 | 44.6  |
|               |      | $\mathbf{n}_2$ | 40  | 65.0             | 67.7             | 73.5             | 62.0 | 63.6 | 62.0 | 96.9 | 96.2 | 91.1  |
|               |      |                | 80  | 68.5             | 72.4             | 77.6             | 64.5 | 67.3 | 64.3 | 98.1 | 97.9 | 92.3  |
|               |      | $\mathbf{n}_3$ | 40  | 53.5             | 55.9             | 60.1             | 50.6 | 53.1 | 51.2 | 90.2 | 88.4 | 86.4  |
|               |      |                | 80  | 48.8             | 52.6             | 58.6             | 44.9 | 47.6 | 45.7 | 89.0 | 87.7 | 84.8  |
| C             | N    | $\mathbf{n}_1$ | 40  | 15.9             | 16.8             | 18.2             | 14.9 | 15.0 | 15.0 | 27.5 | 26.3 | 43.0  |
|               |      |                | 80  | 15.7             | 16.8             | 18.1             | 14.7 | 14.9 | 14.8 | 29.2 | 27.2 | 47.4  |
|               |      | $\mathbf{n}_2$ | 40  | 30.8             | 31.4             | 32.5             | 30.1 | 30.3 | 30.3 | 45.8 | 45.4 | 50.0  |
|               |      |                | 80  | 31.9             | 32.6             | 33.4             | 31.0 | 31.2 | 31.1 | 47.9 | 47.6 | 50.0  |
|               |      | $\mathbf{n}_3$ | 40  | 29.4             | 30.2             | 31.0             | 28.8 | 29.0 | 28.8 | 43.6 | 43.1 | 49.7  |
|               |      |                | 80  | 30.1             | 30.9             | 31.9             | 29.5 | 29.7 | 29.7 | 46.4 | 46.1 | 50.0  |
|               | LN   | $\mathbf{n}_1$ | 40  | 15.3             | 17.4             | 19.5             | 14.1 | 15.1 | 14.1 | 31.9 | 29.7 | 34.8  |
|               |      |                | 80  | 15.7             | 17.4             | 20.1             | 14.3 | 15.4 | 14.6 | 32.4 | 30.0 | 35.1  |
|               |      | $\mathbf{n}_2$ | 40  | 40.9             | 41.9             | 43.5             | 39.9 | 40.5 | 40.0 | 49.4 | 49.2 | 48.2  |
|               |      |                | 80  | 41.9             | 43.1             | 44.4             | 40.9 | 41.6 | 40.8 | 49.7 | 49.6 | 48.5  |
|               |      | $\mathbf{n}_3$ | 40  | 40.2             | 41.0             | 42.0             | 39.3 | 39.9 | 39.4 | 48.3 | 48.0 | 47.5  |
|               |      |                | 80  | 38.9             | 40.0             | 41.6             | 37.8 | 38.6 | 38.0 | 48.1 | 47.9 | 47.2  |
| ACD           | N    | $\mathbf{n}_1$ | 40  | 11.3             | 12.1             | 13.9             | 10.0 | 10.4 | 10.1 | 29.7 | 26.9 | 63.2  |
|               |      |                | 80  | 10.3             | 11.3             | 13.4             | 9.1  | 9.5  | 9.5  | 30.6 | 27.9 | 77.4  |
|               |      | $\mathbf{n}_2$ | 40  | 33.3             | 34.6             | 36.7             | 32.1 | 32.8 | 32.7 | 72.0 | 71.7 | 87.0  |
|               |      |                | 80  | 37.0             | 38.3             | 39.6             | 35.6 | 36.1 | 35.9 | 79.1 | 78.5 | 87.6  |
|               |      | $\mathbf{n}_3$ | 40  | 25.9             | 27.2             | 28.8             | 24.9 | 25.5 | 24.9 | 62.7 | 60.8 | 86.0  |
|               |      |                | 80  | 26.3             | 27.8             | 29.6             | 25.3 | 25.5 | 25.4 | 71.6 | 70.8 | 87.4  |
|               | LN   | $\mathbf{n}_1$ | 40  | 8.1              | 10.1             | 12.3             | 6.5  | 8.0  | 6.7  | 31.8 | 28.3 | 35.8  |
|               |      |                | 80  | 10.0             | 11.8             | 14.2             | 8.8  | 9.8  | 9.0  | 33.6 | 29.6 | 38.2  |
|               |      | $\mathbf{n}_2$ | 40  | 54.9             | 56.5             | 61.4             | 52.4 | 53.6 | 52.6 | 84.1 | 84.5 | 79.3  |
|               |      |                | 80  | 57.3             | 60.3             | 63.7             | 54.2 | 56.4 | 54.3 | 84.2 | 84.6 | 79.2  |
|               |      | $\mathbf{n}_3$ | 40  | 44.1             | 45.8             | 49.5             | 41.5 | 43.9 | 42.3 | 78.0 | 77.3 | 74.4  |
|               |      |                | 80  | 41.0             | 43.9             | 48.3             | 38.2 | 40.3 | 38.9 | 78.0 | 77.0 | 74.8  |



Table 29: Experimentwise (E) and comparisonwise (C) error rates (as percentages) of the tests obtained under Model 3 and standard normal distribution ( $M = 80$ ,  $\sigma^2 = 1.5\rho/2$ ,  $\mathbf{n}_1 = (10, 10, 10, 10)$ ,  $\mathbf{n}_3 = (10, 20, 15, 30)$ ,  $nr = 1000$ ,  $nboot = 10,000$  and  $\alpha = 5\%$ ). For  $M = 150$  and  $\delta = 0.4, 0.6, 0.8, 1$ , the results were very similar, and, therefore, they are omitted.

| Error<br>rate | $\mathbf{n}$   | $\rho$ | $\delta$ | Test             |                  |                  |      |      |      |      |      |       |
|---------------|----------------|--------|----------|------------------|------------------|------------------|------|------|------|------|------|-------|
|               |                |        |          | L <sup>2</sup> N | L <sup>2</sup> B | L <sup>2</sup> b | FN   | FB   | Fb   | GPF  | GPFb | Fmaxb |
| E             | $\mathbf{n}_1$ | 0.1    | 0.0      | 23.5             | 25.5             | 27.3             | 21.9 | 22.9 | 22.3 | 24.2 | 22.1 | 21.3  |
|               |                |        | 0.2      | 11.5             | 12.7             | 13.8             | 10.8 | 11.5 | 10.8 | 11.8 | 10.9 | 11.0  |
|               |                | 0.5    | 0.0      | 21.6             | 24.6             | 27.4             | 20.4 | 22.8 | 20.5 | 24.5 | 20.8 | 23.5  |
|               |                |        | 0.2      | 10.8             | 12.6             | 13.7             | 9.9  | 11.5 | 9.5  | 12.5 | 10.7 | 11.8  |
|               |                | 0.9    | 0.0      | 16.9             | 23.3             | 25.1             | 15.7 | 21.8 | 15.6 | 21.7 | 17.8 | 22.3  |
|               |                |        | 0.2      | 7.4              | 11.2             | 12.1             | 6.9  | 10.0 | 6.8  | 9.5  | 7.5  | 11.0  |
|               | $\mathbf{n}_3$ | 0.1    | 0.0      | 22.5             | 23.0             | 24.0             | 21.1 | 22.2 | 21.6 | 22.8 | 21.6 | 20.4  |
|               |                |        | 0.2      | 11.8             | 12.3             | 12.5             | 11.4 | 11.7 | 11.2 | 12.1 | 11.2 | 10.6  |
|               |                | 0.5    | 0.0      | 22.8             | 24.3             | 24.9             | 22.3 | 23.3 | 21.7 | 23.3 | 21.3 | 22.8  |
|               |                |        | 0.2      | 12.0             | 12.8             | 13.0             | 11.4 | 12.6 | 10.9 | 12.0 | 10.9 | 10.4  |
|               |                | 0.9    | 0.0      | 21.2             | 25.3             | 25.0             | 20.6 | 24.6 | 20.0 | 23.2 | 20.5 | 22.7  |
|               |                |        | 0.2      | 9.5              | 11.4             | 11.6             | 9.3  | 11.2 | 9.0  | 11.4 | 9.1  | 9.6   |
| C             | $\mathbf{n}_1$ | 0.1    | 0.0      | 5.87             | 6.68             | 7.35             | 5.40 | 5.80 | 5.48 | 6.18 | 5.50 | 5.15  |
|               |                |        | 0.2      | 1.93             | 2.15             | 2.33             | 1.80 | 1.93 | 1.80 | 1.98 | 1.82 | 1.87  |
|               |                | 0.5    | 0.0      | 5.37             | 6.27             | 7.00             | 4.95 | 5.70 | 4.95 | 6.08 | 5.10 | 5.50  |
|               |                |        | 0.2      | 1.82             | 2.13             | 2.32             | 1.67 | 1.95 | 1.60 | 2.13 | 1.80 | 2.00  |
|               |                | 0.9    | 0.0      | 4.00             | 5.72             | 6.22             | 3.75 | 5.32 | 3.67 | 5.12 | 3.97 | 5.20  |
|               |                |        | 0.2      | 1.25             | 1.90             | 2.05             | 1.17 | 1.70 | 1.15 | 1.62 | 1.27 | 1.88  |
|               | $\mathbf{n}_3$ | 0.1    | 0.0      | 5.98             | 6.18             | 6.48             | 5.72 | 5.95 | 5.78 | 6.15 | 5.77 | 5.22  |
|               |                |        | 0.2      | 2.02             | 2.10             | 2.13             | 1.95 | 2.00 | 1.92 | 2.07 | 1.92 | 1.83  |
|               |                | 0.5    | 0.0      | 5.97             | 6.50             | 6.72             | 5.82 | 6.23 | 5.72 | 6.30 | 5.65 | 5.37  |
|               |                |        | 0.2      | 2.08             | 2.23             | 2.27             | 1.97 | 2.20 | 1.88 | 2.10 | 1.90 | 1.87  |
|               |                | 0.9    | 0.0      | 5.20             | 6.55             | 6.45             | 5.05 | 6.28 | 4.87 | 6.03 | 5.25 | 5.47  |
|               |                |        | 0.2      | 1.65             | 2.02             | 2.05             | 1.60 | 1.98 | 1.55 | 1.97 | 1.57 | 1.63  |

Table 30: Experimentwise power rates (as percentages) of the tests obtained under Model 3 and standard normal distribution ( $M = 80$ ,  $\sigma^2 = 1.5\rho/2$ ,  $\delta \neq 0$ ,  $\mathbf{n}_1 = (10, 10, 10, 10)$ ,  $\mathbf{n}_3 = (10, 20, 15, 30)$ ,  $nr = 1000$ ,  $nboot = 10,000$  and  $\alpha = 5\%$ ). For  $M = 150$ , the results were very similar, and, therefore, they are omitted.

| $\mathbf{n}$   | $\rho$ | $\delta$ | Test             |                  |                  |      |      |      |      |      |       |
|----------------|--------|----------|------------------|------------------|------------------|------|------|------|------|------|-------|
|                |        |          | L <sup>2</sup> N | L <sup>2</sup> B | L <sup>2</sup> b | FN   | FB   | Fb   | GPF  | GPFb | Fmaxb |
| $\mathbf{n}_1$ | 0.1    | 0.2      | 25.4             | 27.0             | 29.5             | 22.7 | 25.3 | 23.6 | 27.2 | 24.5 | 54.2  |
|                |        | 0.4      | 94.7             | 95.1             | 95.7             | 94.2 | 94.4 | 94.4 | 94.9 | 94.6 | 99.4  |
|                |        | 0.6      | 99.6             | 99.6             | 99.6             | 99.6 | 99.6 | 99.6 | 99.6 | 99.6 | 100   |
|                |        | 0.8      | 100              | 100              | 100              | 100  | 100  | 100  | 100  | 100  | 100   |
|                |        | 1.0      | 100              | 100              | 100              | 100  | 100  | 100  | 100  | 100  | 100   |
|                | 0.5    | 0.2      | 0.4              | 0.5              | 0.5              | 0.3  | 0.4  | 0.3  | 0.6  | 0.3  | 0.3   |
|                |        | 0.4      | 10.7             | 13.0             | 14.0             | 10.1 | 12.0 | 10.1 | 12.8 | 11.0 | 14.9  |
|                |        | 0.6      | 47.1             | 51.7             | 53.6             | 45.2 | 48.4 | 45.4 | 50.6 | 47.2 | 62.0  |
|                |        | 0.8      | 82.0             | 83.9             | 85.9             | 81.0 | 82.5 | 81.0 | 84.0 | 83.0 | 92.9  |
|                |        | 1.0      | 95.8             | 96.2             | 96.8             | 95.2 | 95.8 | 95.6 | 95.9 | 95.6 | 99.1  |
|                | 0.9    | 0.2      | 0.0              | 0.0              | 0.0              | 0.0  | 0.0  | 0.0  | 0.0  | 0.0  | 0.1   |
|                |        | 0.4      | 0.1              | 0.3              | 0.3              | 0.1  | 0.3  | 0.1  | 0.3  | 0.3  | 0.0   |
|                |        | 0.6      | 2.2              | 5.0              | 5.3              | 1.6  | 4.1  | 1.7  | 3.7  | 2.0  | 1.5   |
|                |        | 0.8      | 12.9             | 17.1             | 18.1             | 12.0 | 15.9 | 11.8 | 15.7 | 13.3 | 6.4   |
|                |        | 1.0      | 33.9             | 41.2             | 42.5             | 32.5 | 39.2 | 31.8 | 38.6 | 33.6 | 20.5  |
| $\mathbf{n}_3$ | 0.1    | 0.2      | 51.4             | 53.0             | 53.8             | 49.4 | 51.0 | 50.2 | 52.1 | 50.2 | 85.4  |
|                |        | 0.4      | 99.3             | 99.4             | 99.3             | 99.3 | 99.3 | 99.3 | 99.4 | 99.3 | 99.7  |
|                |        | 0.6      | 99.8             | 99.8             | 99.8             | 99.8 | 99.8 | 99.8 | 99.8 | 99.8 | 100   |
|                |        | 0.8      | 100              | 100              | 100              | 100  | 100  | 100  | 100  | 100  | 100   |
|                |        | 1.0      | 100              | 100              | 100              | 100  | 100  | 100  | 100  | 100  | 100   |
|                | 0.5    | 0.2      | 1.9              | 2.0              | 2.1              | 1.8  | 2.0  | 1.6  | 1.7  | 1.5  | 1.3   |
|                |        | 0.4      | 26.2             | 28.5             | 28.9             | 25.1 | 27.4 | 23.9 | 28.3 | 26.2 | 36.6  |
|                |        | 0.6      | 79.1             | 80.7             | 81.0             | 78.7 | 79.5 | 78.2 | 81.1 | 79.4 | 90.3  |
|                |        | 0.8      | 97.1             | 97.2             | 97.2             | 97.1 | 97.2 | 97   | 97.4 | 97.1 | 99.2  |
|                |        | 1.0      | 99.5             | 99.5             | 99.5             | 99.5 | 99.5 | 99.4 | 99.4 | 99.4 | 99.9  |
|                | 0.9    | 0.2      | 0.4              | 0.4              | 0.4              | 0.4  | 0.4  | 0.3  | 0.3  | 0.2  | 0.0   |
|                |        | 0.4      | 1.8              | 2.2              | 2.2              | 1.7  | 2.1  | 1.5  | 1.6  | 1.1  | 0.6   |
|                |        | 0.6      | 11.6             | 13.8             | 13.7             | 11.3 | 13.4 | 10.7 | 12.6 | 10.5 | 6.3   |
|                |        | 0.8      | 38.7             | 42.8             | 42.3             | 37.6 | 41.9 | 36.9 | 40.7 | 37.4 | 21.1  |
|                |        | 1.0      | 74.5             | 77.3             | 76.1             | 73.2 | 76.3 | 71.7 | 75.1 | 72.3 | 53.5  |

Table 31: Comparisonwise power rates (as percentages) of the tests obtained under Model 3 and standard normal distribution ( $M = 80$ ,  $\sigma^2 = 1.5\rho/2$ ,  $\delta \neq 0$ ,  $\mathbf{n}_1 = (10, 10, 10, 10)$ ,  $\mathbf{n}_3 = (10, 20, 15, 30)$ ,  $nr = 1000$ ,  $nboot = 10,000$  and  $\alpha = 5\%$ ). For  $M = 150$ , the results were very similar, and, therefore, they are omitted.

| $\mathbf{n}$   | $\rho$ | $\delta$ | Test             |                  |                  |       |       |       |       |       |       |
|----------------|--------|----------|------------------|------------------|------------------|-------|-------|-------|-------|-------|-------|
|                |        |          | L <sup>2</sup> N | L <sup>2</sup> B | L <sup>2</sup> b | FN    | FB    | Fb    | GPF   | GPFb  | Fmaxb |
| $\mathbf{n}_1$ | 0.1    | 0.2      | 37.25            | 38.63            | 40.15            | 35.77 | 37.00 | 36.12 | 38.05 | 36.45 | 52.78 |
|                |        | 0.4      | 65.22            | 65.33            | 65.47            | 65.07 | 65.13 | 65.2  | 65.23 | 65.18 | 66.48 |
|                |        | 0.6      | 66.53            | 66.53            | 66.53            | 66.53 | 66.53 | 66.53 | 66.53 | 66.57 | 66.67 |
|                |        | 0.8      | 66.67            | 66.67            | 66.67            | 66.67 | 66.67 | 66.67 | 66.67 | 66.67 | 66.67 |
|                |        | 1.0      | 66.67            | 66.67            | 66.67            | 66.67 | 66.67 | 66.67 | 66.67 | 66.67 | 66.67 |
|                | 0.5    | 0.2      | 8.22             | 9.78             | 10.62            | 7.70  | 8.83  | 7.70  | 9.15  | 8.05  | 8.40  |
|                |        | 0.4      | 26.22            | 28.32            | 29.57            | 25.27 | 27.1  | 25.37 | 28.22 | 26.38 | 31.08 |
|                |        | 0.6      | 49.75            | 51.60            | 52.55            | 48.87 | 50.37 | 49.10 | 51.57 | 50.12 | 56.32 |
|                |        | 0.8      | 61.98            | 62.58            | 63.02            | 61.60 | 62.12 | 61.82 | 62.53 | 62.20 | 65.02 |
|                |        | 1.0      | 65.60            | 65.72            | 65.85            | 65.48 | 65.60 | 65.58 | 65.70 | 65.65 | 66.45 |
|                | 0.9    | 0.2      | 3.08             | 4.87             | 5.20             | 2.92  | 4.33  | 2.85  | 4.05  | 3.18  | 4.18  |
|                |        | 0.4      | 7.12             | 9.52             | 10.15            | 6.58  | 8.98  | 6.58  | 8.47  | 7.08  | 7.37  |
|                |        | 0.6      | 15.93            | 19.77            | 20.67            | 14.92 | 18.48 | 14.82 | 18.18 | 15.73 | 13.82 |
|                |        | 0.8      | 29.10            | 33.67            | 34.35            | 28.23 | 32.33 | 28.15 | 31.88 | 29.10 | 23.98 |
|                |        | 1.0      | 44.92            | 48.23            | 48.78            | 44.07 | 47.33 | 43.92 | 47.28 | 44.53 | 37.72 |
| $\mathbf{n}_3$ | 0.1    | 0.2      | 52.62            | 53.28            | 53.72            | 52.00 | 52.45 | 52.17 | 52.92 | 52.37 | 63.27 |
|                |        | 0.4      | 66.45            | 66.48            | 66.45            | 66.45 | 66.45 | 66.45 | 66.47 | 66.45 | 66.62 |
|                |        | 0.6      | 66.63            | 66.63            | 66.62            | 66.63 | 66.63 | 66.63 | 66.63 | 66.63 | 66.67 |
|                |        | 0.8      | 66.67            | 66.67            | 66.67            | 66.67 | 66.67 | 66.67 | 66.67 | 66.67 | 66.67 |
|                |        | 1.0      | 66.67            | 66.67            | 66.67            | 66.67 | 66.67 | 66.67 | 66.67 | 66.67 | 66.67 |
|                | 0.5    | 0.2      | 13.43            | 14.20            | 14.50            | 13.00 | 13.80 | 12.83 | 14.03 | 13.27 | 14.32 |
|                |        | 0.4      | 42.12            | 43.15            | 43.40            | 41.65 | 42.58 | 41.37 | 43.35 | 42.37 | 48.42 |
|                |        | 0.6      | 61.82            | 62.25            | 62.30            | 61.70 | 61.93 | 61.68 | 62.38 | 61.97 | 64.67 |
|                |        | 0.8      | 66.03            | 66.05            | 66.05            | 66.02 | 66.05 | 66.00 | 66.10 | 66.05 | 66.48 |
|                |        | 1.0      | 66.47            | 66.48            | 66.45            | 66.47 | 66.47 | 66.45 | 66.48 | 66.48 | 66.65 |
|                | 0.9    | 0.2      | 6.23             | 7.20             | 7.20             | 6.03  | 7.03  | 5.73  | 6.77  | 5.80  | 5.68  |
|                |        | 0.4      | 14.60            | 16.37            | 16.23            | 14.27 | 15.83 | 13.92 | 15.33 | 13.98 | 12.43 |
|                |        | 0.6      | 31.55            | 34.00            | 33.68            | 31.15 | 33.32 | 30.45 | 32.77 | 31.05 | 25.37 |
|                |        | 0.8      | 49.10            | 50.90            | 50.60            | 48.73 | 50.48 | 48.20 | 50.13 | 48.68 | 41.20 |
|                |        | 1.0      | 60.87            | 61.53            | 61.28            | 60.60 | 61.33 | 60.17 | 61.10 | 60.33 | 55.45 |

Table 32: The ACD power rates (as percentages) of the tests obtained under Model 3 and standard normal distribution ( $M = 80$ ,  $\sigma^2 = 1.5\rho/2$ ,  $\delta \neq 0$ ,  $\mathbf{n}_1 = (10, 10, 10, 10)$ ,  $\mathbf{n}_3 = (10, 20, 15, 30)$ ,  $nr = 1000$ ,  $nboot = 10,000$  and  $\alpha = 5\%$ ). For  $M = 150$ , the results were very similar, and, therefore, they are omitted.

| $\mathbf{n}$   | $\rho$ | $\delta$ | Test             |                  |                  |      |      |      |      |      |       |
|----------------|--------|----------|------------------|------------------|------------------|------|------|------|------|------|-------|
|                |        |          | L <sup>2</sup> N | L <sup>2</sup> B | L <sup>2</sup> b | FN   | FB   | Fb   | GPF  | GPFb | Fmaxb |
| $\mathbf{n}_1$ | 0.1    | 0.2      | 24.2             | 25.6             | 27.8             | 21.7 | 28.1 | 22.7 | 25.9 | 23.5 | 50.2  |
|                |        | 0.4      | 84.2             | 83.4             | 82.9             | 84.5 | 84.6 | 84.6 | 84.1 | 84.8 | 88.6  |
|                |        | 0.6      | 88.2             | 87.0             | 85.9             | 88.9 | 88.2 | 88.9 | 87.9 | 88.8 | 89.0  |
|                |        | 0.8      | 88.5             | 87.3             | 86.2             | 89.2 | 88.5 | 89.2 | 88.2 | 89.1 | 89.0  |
|                |        | 1.0      | 88.5             | 87.3             | 86.2             | 89.2 | 88.5 | 89.2 | 88.2 | 89.1 | 89.0  |
|                | 0.5    | 0.2      | 0.4              | 0.5              | 0.5              | 0.3  | 0.9  | 0.3  | 0.6  | 0.3  | 0.3   |
|                |        | 0.4      | 9.9              | 11.8             | 12.6             | 9.3  | 13.6 | 9.3  | 11.6 | 10.4 | 13.5  |
|                |        | 0.6      | 44.0             | 47.6             | 48.7             | 42.2 | 47.3 | 42.6 | 46.5 | 44.1 | 54.9  |
|                |        | 0.8      | 74.6             | 75.0             | 75.9             | 74.3 | 77.0 | 74.7 | 75.1 | 75.7 | 82.2  |
|                |        | 1.0      | 85.7             | 84.4             | 83.7             | 86.0 | 85.8 | 86.8 | 84.2 | 85.8 | 87.5  |
|                | 0.9    | 0.2      | 0.0              | 0.0              | 0.0              | 0.0  | 0.0  | 0.0  | 0.0  | 0.0  | 0.1   |
|                |        | 0.4      | 0.1              | 0.3              | 0.3              | 0.1  | 0.8  | 0.1  | 0.2  | 0.2  | 0.0   |
|                |        | 0.6      | 1.8              | 4.2              | 4.3              | 1.4  | 5.0  | 1.5  | 3.2  | 1.9  | 1.1   |
|                |        | 0.8      | 11.8             | 14.9             | 15.7             | 10.9 | 17.7 | 10.7 | 13.8 | 12.3 | 5.4   |
|                |        | 1.0      | 31.1             | 36.0             | 36.9             | 30.0 | 40.0 | 29.3 | 34.5 | 30.8 | 17.6  |
| $\mathbf{n}_3$ | 0.1    | 0.2      | 47.8             | 49.0             | 49.2             | 46.0 | 56.8 | 46.8 | 48.2 | 46.6 | 77.8  |
|                |        | 0.4      | 87.7             | 87.3             | 87.0             | 88.1 | 88.0 | 88.3 | 87.4 | 88.3 | 89.2  |
|                |        | 0.6      | 88.0             | 87.5             | 87.3             | 88.4 | 88.2 | 88.6 | 87.7 | 88.6 | 89.4  |
|                |        | 0.8      | 88.2             | 87.7             | 87.5             | 88.6 | 88.3 | 88.8 | 87.9 | 88.8 | 89.4  |
|                |        | 1.0      | 88.2             | 87.7             | 87.5             | 88.6 | 88.3 | 88.8 | 87.9 | 88.8 | 89.4  |
|                | 0.5    | 0.2      | 1.7              | 1.7              | 1.8              | 1.6  | 2.3  | 1.5  | 1.6  | 1.4  | 1.2   |
|                |        | 0.4      | 23.1             | 24.9             | 25.3             | 22.1 | 31.9 | 21.6 | 25.4 | 23.8 | 32.8  |
|                |        | 0.6      | 71.2             | 71.8             | 71.8             | 71.0 | 77.7 | 70.9 | 73.0 | 72.3 | 81.1  |
|                |        | 0.8      | 86.0             | 85.2             | 85.0             | 86.6 | 86.7 | 87.1 | 86.2 | 87.1 | 89.1  |
|                |        | 1.0      | 87.6             | 86.8             | 86.6             | 88.2 | 87.0 | 88.7 | 87.6 | 88.7 | 89.5  |
|                | 0.9    | 0.2      | 0.2              | 0.2              | 0.2              | 0.2  | 0.3  | 0.2  | 0.2  | 0.1  | 0.0   |
|                |        | 0.4      | 1.5              | 1.9              | 1.9              | 1.4  | 2.2  | 1.2  | 1.3  | 0.8  | 0.6   |
|                |        | 0.6      | 10.0             | 11.7             | 11.6             | 9.8  | 16.4 | 9.3  | 10.7 | 9.1  | 5.5   |
|                |        | 0.8      | 34.4             | 37.0             | 36.3             | 33.5 | 48.3 | 33.0 | 35.2 | 33.2 | 18.5  |
|                |        | 1.0      | 67.2             | 68.2             | 67.0             | 66.2 | 76.3 | 64.9 | 66.4 | 65.5 | 48.3  |

Table 33: Experimentwise (E) and comparisonwise (C) error rates (as percentages) of the tests obtained under Model 4 and standard normal distribution ( $M = 80$ ,  $\sigma^2 = 1.5\rho/2$ ,  $\mathbf{n}_1 = (10, 10, 10, 10)$ ,  $\mathbf{n}_3 = (10, 20, 15, 30)$ ,  $nr = 1000$ ,  $nboot = 10,000$  and  $\alpha = 5\%$ ). For  $M = 150$  and  $\delta = 0.4, 0.6, 0.8, 1$ , the results were very similar, and, therefore, they are omitted.

| Error<br>rate | $\mathbf{n}$   | $\rho$ | $\delta$ | Test             |                  |                  |      |      |      |      |      |       |
|---------------|----------------|--------|----------|------------------|------------------|------------------|------|------|------|------|------|-------|
|               |                |        |          | L <sup>2</sup> N | L <sup>2</sup> B | L <sup>2</sup> b | FN   | FB   | Fb   | GPF  | GPFb | Fmaxb |
| E             | $\mathbf{n}_1$ | 0.1    | 0.0      | 23.4             | 25.4             | 27.6             | 21.2 | 21.8 | 21.8 | 23.8 | 21.5 | 21.3  |
|               |                |        | 0.2      | 11.4             | 12.1             | 13.5             | 10.6 | 10.7 | 10.5 | 11.6 | 10.9 | 10.5  |
|               |                | 0.5    | 0.0      | 21.5             | 24.6             | 27.0             | 20.1 | 21.4 | 20.4 | 23.6 | 21.1 | 22.3  |
|               |                |        | 0.2      | 10.8             | 12.4             | 13.3             | 9.4  | 10.6 | 9.7  | 11.7 | 10.6 | 11.7  |
|               |                | 0.9    | 0.0      | 17.7             | 22.7             | 24.5             | 16.1 | 21.0 | 16.3 | 22.0 | 18.7 | 23.2  |
|               |                |        | 0.2      | 7.6              | 10.9             | 12.4             | 6.5  | 9.9  | 6.8  | 9.7  | 7.7  | 11.5  |
|               | $\mathbf{n}_3$ | 0.1    | 0.0      | 18.6             | 19.6             | 21.8             | 17.5 | 17.7 | 17.7 | 18.7 | 17.7 | 18.9  |
|               |                |        | 0.2      | 8.9              | 9.5              | 10.4             | 8.3  | 8.3  | 8.4  | 8.8  | 8.3  | 9.7   |
|               |                | 0.5    | 0.0      | 19.6             | 20.4             | 22.0             | 19.4 | 19.6 | 19.7 | 20.3 | 19.2 | 20.9  |
|               |                |        | 0.2      | 9.5              | 10.1             | 11.3             | 9.2  | 9.5  | 9.2  | 10.3 | 9.5  | 9.3   |
|               |                | 0.9    | 0.0      | 19.3             | 22.8             | 24.3             | 18.6 | 22.2 | 18.1 | 21.9 | 18.7 | 24.4  |
|               |                |        | 0.2      | 8.3              | 10.3             | 10.8             | 7.8  | 10.1 | 7.8  | 9.2  | 8.0  | 10.7  |
| C             | $\mathbf{n}_1$ | 0.1    | 0.0      | 5.93             | 6.58             | 7.38             | 5.22 | 5.35 | 5.38 | 6.02 | 5.35 | 5.28  |
|               |                |        | 0.2      | 1.90             | 2.03             | 2.28             | 1.77 | 1.78 | 1.75 | 1.95 | 1.82 | 1.78  |
|               |                | 0.5    | 0.0      | 5.40             | 6.15             | 6.92             | 4.93 | 5.35 | 5.02 | 5.87 | 5.32 | 5.32  |
|               |                |        | 0.2      | 1.82             | 2.10             | 2.25             | 1.58 | 1.78 | 1.63 | 2.00 | 1.80 | 1.98  |
|               |                | 0.9    | 0.0      | 4.18             | 5.55             | 6.25             | 3.82 | 5.13 | 3.88 | 5.13 | 4.08 | 5.33  |
|               |                |        | 0.2      | 1.28             | 1.85             | 2.10             | 1.10 | 1.68 | 1.15 | 1.65 | 1.30 | 1.95  |
|               | $\mathbf{n}_3$ | 0.1    | 0.0      | 4.78             | 5.05             | 5.58             | 4.45 | 4.52 | 4.52 | 4.82 | 4.52 | 4.85  |
|               |                |        | 0.2      | 1.52             | 1.62             | 1.77             | 1.42 | 1.42 | 1.43 | 1.50 | 1.42 | 1.65  |
|               |                | 0.5    | 0.0      | 5.12             | 5.38             | 5.92             | 4.97 | 5.10 | 5.05 | 5.27 | 4.92 | 5.15  |
|               |                |        | 0.2      | 1.63             | 1.73             | 1.93             | 1.57 | 1.63 | 1.58 | 1.77 | 1.62 | 1.58  |
|               |                | 0.9    | 0.0      | 4.50             | 5.50             | 5.87             | 4.25 | 5.22 | 4.20 | 5.07 | 4.35 | 5.28  |
|               |                |        | 0.2      | 1.38             | 1.75             | 1.87             | 1.30 | 1.68 | 1.30 | 1.57 | 1.33 | 1.82  |

Table 34: Experimentwise power rates (as percentages) of the tests obtained under Model 4 and standard normal distribution ( $M = 80$ ,  $\sigma^2 = 1.5\rho/2$ ,  $\delta \neq 0$ ,  $\mathbf{n}_1 = (10, 10, 10, 10)$ ,  $\mathbf{n}_3 = (10, 20, 15, 30)$ ,  $nr = 1000$ ,  $nboot = 10,000$  and  $\alpha = 5\%$ ). For  $M = 150$ , the results were very similar, and, therefore, they are omitted.

| $\mathbf{n}$   | $\rho$ | $\delta$ | Test             |                  |                  |      |      |      |      |      |       |
|----------------|--------|----------|------------------|------------------|------------------|------|------|------|------|------|-------|
|                |        |          | L <sup>2</sup> N | L <sup>2</sup> B | L <sup>2</sup> b | FN   | FB   | Fb   | GPF  | GPFb | Fmaxb |
| $\mathbf{n}_1$ | 0.1    | 0.2      | 24.8             | 27.4             | 29.8             | 22.7 | 23.0 | 23.0 | 24.7 | 23.4 | 74.1  |
|                |        | 0.4      | 94.6             | 95.0             | 95.2             | 93.8 | 94.0 | 94.0 | 94.9 | 93.9 | 99.7  |
|                |        | 0.6      | 99.5             | 99.5             | 99.5             | 99.5 | 99.5 | 99.5 | 99.6 | 99.6 | 100   |
|                |        | 0.8      | 99.9             | 99.9             | 99.9             | 99.9 | 99.9 | 99.9 | 100  | 100  | 100   |
|                |        | 1.0      | 99.9             | 100              | 100              | 99.9 | 99.9 | 100  | 100  | 100  | 100   |
|                | 0.5    | 0.2      | 0.4              | 0.5              | 0.6              | 0.3  | 0.4  | 0.3  | 0.6  | 0.4  | 0.7   |
|                |        | 0.4      | 10.9             | 12.3             | 14.7             | 10.2 | 11.0 | 10.6 | 12.5 | 10.9 | 20.1  |
|                |        | 0.6      | 47.9             | 50.9             | 53.5             | 45.8 | 47.8 | 46.3 | 49.6 | 46.9 | 69.7  |
|                |        | 0.8      | 82.1             | 84.1             | 86.4             | 80.9 | 82.0 | 81.0 | 83.3 | 82.1 | 94.5  |
|                |        | 1.0      | 95.4             | 95.9             | 96.5             | 95.1 | 95.3 | 95.5 | 95.6 | 95.5 | 99.5  |
|                | 0.9    | 0.2      | 0.0              | 0.0              | 0.0              | 0.0  | 0.0  | 0.0  | 0.0  | 0.0  | 0.0   |
|                |        | 0.4      | 0.1              | 0.2              | 0.3              | 0.1  | 0.2  | 0.1  | 0.3  | 0.3  | 0.0   |
|                |        | 0.6      | 2.7              | 4.8              | 5.5              | 2.0  | 4.5  | 2.0  | 4.0  | 3.1  | 1.6   |
|                |        | 0.8      | 13.6             | 17.9             | 19.0             | 12.9 | 16.7 | 12.8 | 15.9 | 13.3 | 7.1   |
|                |        | 1.0      | 35.5             | 42.0             | 43.9             | 33.4 | 40.0 | 33.0 | 39.5 | 34.6 | 22.1  |
| $\mathbf{n}_3$ | 0.1    | 0.2      | 44.8             | 46.3             | 48.1             | 42.9 | 43.1 | 43.3 | 44.2 | 43.2 | 95.8  |
|                |        | 0.4      | 99.8             | 99.8             | 99.8             | 99.8 | 99.8 | 99.8 | 100  | 100  | 100   |
|                |        | 0.6      | 99.8             | 99.8             | 99.8             | 99.8 | 99.8 | 99.8 | 100  | 100  | 100   |
|                |        | 0.8      | 99.9             | 99.9             | 99.9             | 99.9 | 99.9 | 99.9 | 100  | 100  | 100   |
|                |        | 1.0      | 100              | 100              | 100              | 100  | 100  | 100  | 100  | 100  | 100   |
|                | 0.5    | 0.2      | 1.4              | 1.6              | 1.7              | 1.4  | 1.5  | 1.4  | 1.9  | 1.7  | 2.2   |
|                |        | 0.4      | 23.3             | 24.9             | 27.0             | 22.5 | 23.4 | 22.7 | 24.4 | 23.1 | 44.1  |
|                |        | 0.6      | 77.0             | 78.0             | 79.0             | 76.6 | 77.0 | 76.6 | 78.6 | 77.3 | 92.8  |
|                |        | 0.8      | 98.3             | 98.4             | 98.5             | 98.3 | 98.3 | 98.3 | 98.3 | 98.2 | 99.7  |
|                |        | 1.0      | 99.7             | 99.7             | 99.8             | 99.7 | 99.7 | 99.7 | 99.9 | 99.9 | 100   |
|                | 0.9    | 0.2      | 0.2              | 0.4              | 0.4              | 0.1  | 0.3  | 0.1  | 0.2  | 0.0  | 0.1   |
|                |        | 0.4      | 1.2              | 1.9              | 2.1              | 1.2  | 1.6  | 1.2  | 1.5  | 1.5  | 0.5   |
|                |        | 0.6      | 11.7             | 14.1             | 15.3             | 11.6 | 13.0 | 11.4 | 13.4 | 11.5 | 5.7   |
|                |        | 0.8      | 41.5             | 45.3             | 47.2             | 40.8 | 44.4 | 40.7 | 43.4 | 39.8 | 21.6  |
|                |        | 1.0      | 76.1             | 78.4             | 79.1             | 75.8 | 78.2 | 75.5 | 77.1 | 75.7 | 50.5  |

Table 35: Comparisonwise power rates (as percentages) of the tests obtained under Model 4 and standard normal distribution ( $M = 80$ ,  $\sigma^2 = 1.5\rho/2$ ,  $\delta \neq 0$ ,  $\mathbf{n}_1 = (10, 10, 10, 10)$ ,  $\mathbf{n}_3 = (10, 20, 15, 30)$ ,  $nr = 1000$ ,  $nboot = 10,000$  and  $\alpha = 5\%$ ). For  $M = 150$ , the results were very similar, and, therefore, they are omitted.

| n              | $\rho$ | $\delta$ | Test             |                  |                  |       |       |       |       |       |       |
|----------------|--------|----------|------------------|------------------|------------------|-------|-------|-------|-------|-------|-------|
|                |        |          | L <sup>2</sup> N | L <sup>2</sup> B | L <sup>2</sup> b | FN    | FB    | Fb    | GPF   | GPFb  | Fmaxb |
| n <sub>1</sub> | 0.1    | 0.2      | 37.07            | 38.58            | 40.10            | 35.40 | 35.63 | 35.73 | 36.82 | 35.63 | 59.73 |
|                |        | 0.4      | 65.10            | 65.25            | 65.32            | 64.88 | 64.92 | 64.95 | 65.18 | 65.00 | 66.58 |
|                |        | 0.6      | 66.50            | 66.50            | 66.50            | 66.50 | 66.50 | 66.50 | 66.53 | 66.53 | 66.67 |
|                |        | 0.8      | 66.63            | 66.63            | 66.63            | 66.63 | 66.63 | 66.63 | 66.67 | 66.67 | 66.67 |
|                |        | 1.0      | 66.65            | 66.67            | 66.67            | 66.63 | 66.63 | 66.67 | 66.67 | 66.67 | 66.67 |
|                | 0.5    | 0.2      | 8.20             | 9.42             | 10.62            | 7.53  | 8.22  | 7.78  | 9.12  | 8.15  | 9.37  |
|                |        | 0.4      | 26.37            | 28.15            | 29.88            | 25.17 | 26.40 | 25.57 | 28.05 | 26.23 | 34.95 |
|                |        | 0.6      | 49.90            | 51.23            | 52.38            | 48.92 | 49.80 | 49.25 | 51.03 | 49.75 | 58.58 |
|                |        | 0.8      | 61.92            | 62.48            | 62.98            | 61.42 | 61.82 | 61.67 | 62.28 | 62.02 | 65.43 |
|                |        | 1.0      | 65.47            | 65.60            | 65.75            | 65.38 | 65.43 | 65.53 | 65.63 | 65.62 | 66.55 |
|                | 0.9    | 0.2      | 3.13             | 4.68             | 5.17             | 2.93  | 4.18  | 2.90  | 4.20  | 3.35  | 4.28  |
|                |        | 0.4      | 7.42             | 9.53             | 10.33            | 6.95  | 8.65  | 6.98  | 8.65  | 7.47  | 7.37  |
|                |        | 0.6      | 16.53            | 19.83            | 21.00            | 15.67 | 18.78 | 15.62 | 18.60 | 16.45 | 13.87 |
|                |        | 0.8      | 29.92            | 33.98            | 35.02            | 28.70 | 32.67 | 28.90 | 32.27 | 29.72 | 24.35 |
|                |        | 1.0      | 45.55            | 48.52            | 49.33            | 44.62 | 47.53 | 44.62 | 47.65 | 45.37 | 38.10 |
| n <sub>3</sub> | 0.1    | 0.2      | 50.43            | 51.05            | 51.93            | 49.68 | 49.78 | 49.80 | 50.30 | 49.72 | 65.83 |
|                |        | 0.4      | 66.55            | 66.55            | 66.55            | 66.55 | 66.55 | 66.55 | 66.67 | 66.67 | 66.67 |
|                |        | 0.6      | 66.60            | 66.60            | 66.60            | 66.60 | 66.60 | 66.60 | 66.67 | 66.67 | 66.67 |
|                |        | 0.8      | 66.65            | 66.65            | 66.63            | 66.65 | 66.65 | 66.63 | 66.67 | 66.67 | 66.67 |
|                |        | 1.0      | 66.67            | 66.67            | 66.67            | 66.67 | 66.67 | 66.67 | 66.67 | 66.67 | 66.67 |
|                | 0.5    | 0.2      | 11.80            | 12.48            | 13.37            | 11.37 | 11.80 | 11.52 | 12.48 | 11.92 | 15.10 |
|                |        | 0.4      | 40.18            | 41.17            | 42.07            | 39.68 | 40.18 | 39.83 | 41.08 | 40.25 | 50.57 |
|                |        | 0.6      | 61.48            | 61.78            | 62.10            | 61.35 | 61.47 | 61.38 | 61.97 | 61.60 | 65.23 |
|                |        | 0.8      | 66.25            | 66.27            | 66.30            | 66.25 | 66.25 | 66.25 | 66.32 | 66.30 | 66.62 |
|                |        | 1.0      | 66.53            | 66.53            | 66.55            | 66.53 | 66.53 | 66.55 | 66.65 | 66.65 | 66.67 |
|                | 0.9    | 0.2      | 5.30             | 6.30             | 6.68             | 5.12  | 5.97  | 5.05  | 5.88  | 5.10  | 5.15  |
|                |        | 0.4      | 14.10            | 15.87            | 16.63            | 13.87 | 15.35 | 13.80 | 15.12 | 14.02 | 11.62 |
|                |        | 0.6      | 32.23            | 34.47            | 35.38            | 31.63 | 33.62 | 31.60 | 33.22 | 31.73 | 24.73 |
|                |        | 0.8      | 50.30            | 51.95            | 52.60            | 49.90 | 51.55 | 49.80 | 50.98 | 49.67 | 41.07 |
|                |        | 1.0      | 61.15            | 61.75            | 61.98            | 61.03 | 61.67 | 60.97 | 61.55 | 61.12 | 54.57 |

Table 36: The ACD power rates (as percentages) of the tests obtained under Model 4 and standard normal distribution ( $M = 80$ ,  $\sigma^2 = 1.5\rho/2$ ,  $\delta \neq 0$ ,  $\mathbf{n}_1 = (10, 10, 10, 10)$ ,  $\mathbf{n}_3 = (10, 20, 15, 30)$ ,  $nr = 1000$ ,  $nboot = 10,000$  and  $\alpha = 5\%$ ). For  $M = 150$ , the results were very similar, and, therefore, they are omitted.

| $\mathbf{n}$   | $\rho$ | $\delta$ | Test             |                  |                  |      |      |      |      |      |       |
|----------------|--------|----------|------------------|------------------|------------------|------|------|------|------|------|-------|
|                |        |          | L <sup>2</sup> N | L <sup>2</sup> B | L <sup>2</sup> b | FN   | FB   | Fb   | GPF  | GPFb | Fmaxb |
| $\mathbf{n}_1$ | 0.1    | 0.2      | 23.7             | 26.1             | 28.1             | 21.8 | 26.7 | 22.1 | 23.4 | 22.2 | 67.8  |
|                |        | 0.4      | 84.2             | 84.0             | 83.0             | 84.4 | 85.0 | 84.6 | 84.3 | 84.2 | 89.3  |
|                |        | 0.6      | 88.2             | 87.5             | 86.1             | 89.1 | 88.9 | 89.1 | 88.1 | 88.8 | 89.5  |
|                |        | 0.8      | 88.5             | 87.8             | 86.4             | 89.4 | 89.2 | 89.4 | 88.4 | 89.1 | 89.5  |
|                |        | 1.0      | 88.5             | 87.9             | 86.5             | 89.4 | 89.2 | 89.5 | 88.3 | 89.1 | 89.4  |
|                | 0.5    | 0.2      | 0.4              | 0.5              | 0.6              | 0.3  | 0.7  | 0.3  | 0.6  | 0.4  | 0.7   |
|                |        | 0.4      | 9.9              | 11.1             | 13.2             | 9.4  | 12.9 | 9.8  | 11.5 | 10.2 | 18.4  |
|                |        | 0.6      | 44.4             | 46.6             | 48.7             | 43.0 | 46.8 | 43.5 | 45.8 | 43.9 | 63.2  |
|                |        | 0.8      | 74.7             | 75.4             | 76.5             | 74.8 | 77.0 | 74.7 | 75.1 | 74.9 | 84.3  |
|                |        | 1.0      | 85.4             | 84.3             | 83.7             | 86.4 | 86.2 | 86.5 | 84.8 | 85.9 | 87.9  |
|                | 0.9    | 0.2      | 0.0              | 0.0              | 0.0              | 0.0  | 0.0  | 0.0  | 0.0  | 0.0  | 0.0   |
|                |        | 0.4      | 0.1              | 0.2              | 0.3              | 0.1  | 0.6  | 0.1  | 0.2  | 0.2  | 0.0   |
|                |        | 0.6      | 2.2              | 3.9              | 4.4              | 1.9  | 5.6  | 1.9  | 3.3  | 2.6  | 1.2   |
|                |        | 0.8      | 12.4             | 15.7             | 16.2             | 11.9 | 18.0 | 11.8 | 14.1 | 12.1 | 5.8   |
|                |        | 1.0      | 32.1             | 36.5             | 37.9             | 30.8 | 40.0 | 30.4 | 35.5 | 31.9 | 18.9  |
| $\mathbf{n}_3$ | 0.1    | 0.2      | 42.2             | 43.5             | 45.2             | 40.6 | 51.1 | 41.0 | 41.9 | 41.0 | 87.0  |
|                |        | 0.4      | 90.9             | 90.3             | 89.5             | 91.6 | 91.5 | 91.4 | 91.2 | 91.7 | 90.5  |
|                |        | 0.6      | 90.9             | 90.3             | 89.5             | 91.7 | 91.5 | 91.4 | 91.2 | 91.7 | 90.5  |
|                |        | 0.8      | 91.0             | 90.4             | 89.6             | 91.8 | 91.7 | 91.5 | 91.2 | 91.7 | 90.5  |
|                |        | 1.0      | 91.1             | 90.5             | 89.7             | 91.9 | 91.7 | 91.6 | 91.2 | 91.7 | 90.5  |
|                | 0.5    | 0.2      | 1.3              | 1.5              | 1.6              | 1.3  | 1.9  | 1.3  | 1.7  | 1.5  | 1.9   |
|                |        | 0.4      | 21.5             | 22.9             | 24.9             | 21.0 | 30.1 | 21.3 | 22.8 | 21.8 | 40.8  |
|                |        | 0.6      | 70.8             | 71.3             | 71.3             | 70.8 | 79.6 | 70.7 | 71.7 | 71.4 | 84.6  |
|                |        | 0.8      | 89.6             | 89.1             | 88.1             | 89.9 | 90.1 | 89.9 | 88.9 | 89.6 | 90.6  |
|                |        | 1.0      | 90.3             | 89.7             | 88.5             | 90.6 | 90.3 | 90.6 | 89.7 | 90.5 | 90.8  |
|                | 0.9    | 0.2      | 0.1              | 0.3              | 0.3              | 0.0  | 0.2  | 0.0  | 0.1  | 0.0  | 0.1   |
|                |        | 0.4      | 0.9              | 1.2              | 1.4              | 0.9  | 1.8  | 0.9  | 1.0  | 1.0  | 0.4   |
|                |        | 0.6      | 10.9             | 12.6             | 13.4             | 10.8 | 16.6 | 10.6 | 12.0 | 10.2 | 5.1   |
|                |        | 0.8      | 38.1             | 40.5             | 41.9             | 38.1 | 51.0 | 38.0 | 39.6 | 36.7 | 19.4  |
|                |        | 1.0      | 69.9             | 70.5             | 70.7             | 70.1 | 79.5 | 70.0 | 70.4 | 70.2 | 45.5  |



Table 37: Experimentwise (E) and comparisonwise (C) error rates (as percentages) of the tests obtained under Model 5 and standard normal distribution ( $M = 80$ ,  $\mathbf{n}_1 = (10, 10, 10, 10)$ ,  $\mathbf{n}_3 = (10, 20, 15, 30)$ ,  $nr = 1000$ ,  $nboot = 10,000$  and  $\alpha = 5\%$ ). For  $\delta = 0.4, 0.6, 0.8, 1$ , the results were very similar, and, therefore, they are omitted.

| Error<br>rate | $\mathbf{n}$   | $\rho$ | $\delta$ | Test             |                  |                  |      |      |      |      |      |       |
|---------------|----------------|--------|----------|------------------|------------------|------------------|------|------|------|------|------|-------|
|               |                |        |          | L <sup>2</sup> N | L <sup>2</sup> B | L <sup>2</sup> b | FN   | FB   | Fb   | GPF  | GPFb | Fmaxb |
| E             | $\mathbf{n}_1$ | 0.1    | 0.0      | 19.6             | 20.8             | 24.3             | 17.1 | 17.3 | 17.2 | 19.1 | 17.2 | 17.1  |
|               |                |        | 0.2      | 10.5             | 11.3             | 11.8             | 9.2  | 9.3  | 9.4  | 10.6 | 9.7  | 8.8   |
|               |                | 0.5    | 0.0      | 21.1             | 23.4             | 27.5             | 19.4 | 20.7 | 19.5 | 22.6 | 20.0 | 21.4  |
|               |                |        | 0.2      | 11.2             | 11.9             | 13.4             | 9.8  | 10.6 | 9.8  | 10.6 | 9.6  | 10.0  |
|               |                | 0.9    | 0.0      | 20.2             | 22.5             | 26.4             | 18.0 | 19.3 | 18.3 | 21.2 | 18.9 | 21.0  |
|               |                |        | 0.2      | 9.8              | 11.1             | 13.6             | 8.8  | 9.2  | 8.9  | 11.1 | 9.2  | 10.4  |
|               | $\mathbf{n}_3$ | 0.1    | 0.0      | 22.5             | 23.4             | 25.1             | 20.8 | 20.9 | 21.2 | 22.3 | 21.1 | 20.0  |
|               |                |        | 0.2      | 11.3             | 12.3             | 13.3             | 10.5 | 10.6 | 10.4 | 11.4 | 10.5 | 11.0  |
|               |                | 0.5    | 0.0      | 21.9             | 22.6             | 24.4             | 20.7 | 21.4 | 21.1 | 21.7 | 20.2 | 20.9  |
|               |                |        | 0.2      | 9.8              | 10.9             | 11.8             | 9.5  | 9.6  | 9.7  | 10.1 | 9.6  | 9.3   |
|               |                | 0.9    | 0.0      | 20.2             | 21.7             | 23.6             | 19.0 | 20.1 | 19.3 | 22.1 | 20.0 | 20.2  |
|               |                |        | 0.2      | 8.5              | 9.6              | 10.0             | 8.1  | 8.4  | 8.1  | 9.6  | 8.5  | 8.4   |
| C             | $\mathbf{n}_1$ | 0.1    | 0.0      | 5.05             | 5.60             | 6.52             | 4.38 | 4.45 | 4.45 | 5.00 | 4.50 | 4.35  |
|               |                |        | 0.2      | 1.78             | 1.95             | 2.05             | 1.57 | 1.58 | 1.60 | 1.80 | 1.65 | 1.52  |
|               |                | 0.5    | 0.0      | 5.38             | 6.02             | 7.28             | 4.80 | 5.15 | 4.85 | 5.75 | 5.00 | 5.03  |
|               |                |        | 0.2      | 1.98             | 2.12             | 2.38             | 1.75 | 1.88 | 1.75 | 1.88 | 1.67 | 1.83  |
|               |                | 0.9    | 0.0      | 4.87             | 5.60             | 6.82             | 4.27 | 4.63 | 4.35 | 5.23 | 4.55 | 5.13  |
|               |                |        | 0.2      | 1.70             | 1.93             | 2.35             | 1.50 | 1.58 | 1.53 | 1.92 | 1.58 | 1.80  |
|               | $\mathbf{n}_3$ | 0.1    | 0.0      | 5.67             | 6.00             | 6.50             | 5.15 | 5.22 | 5.25 | 5.62 | 5.23 | 5.10  |
|               |                |        | 0.2      | 1.95             | 2.12             | 2.28             | 1.82 | 1.83 | 1.80 | 1.97 | 1.82 | 1.88  |
|               |                | 0.5    | 0.0      | 5.38             | 5.68             | 6.18             | 5.05 | 5.27 | 5.18 | 5.35 | 4.95 | 4.80  |
|               |                |        | 0.2      | 1.68             | 1.88             | 2.03             | 1.63 | 1.65 | 1.68 | 1.73 | 1.65 | 1.60  |
|               |                | 0.9    | 0.0      | 4.70             | 5.13             | 5.68             | 4.35 | 4.70 | 4.43 | 5.23 | 4.67 | 4.57  |
|               |                |        | 0.2      | 1.45             | 1.63             | 1.70             | 1.38 | 1.43 | 1.38 | 1.62 | 1.43 | 1.40  |

Table 38: Experimentwise power rates (as percentages) of the tests obtained under Model 5 and standard normal distribution ( $M = 80$ ,  $\delta \neq 0$ ,  $\mathbf{n}_1 = (10, 10, 10, 10)$ ,  $\mathbf{n}_3 = (10, 20, 15, 30)$ ,  $nr = 1000$ ,  $nboot = 10,000$  and  $\alpha = 5\%$ ).

| $\mathbf{n}$   | $\rho$ | $\delta$ | Test             |                  |                  |      |      |      |      |      |       |
|----------------|--------|----------|------------------|------------------|------------------|------|------|------|------|------|-------|
|                |        |          | L <sup>2</sup> N | L <sup>2</sup> B | L <sup>2</sup> b | FN   | FB   | Fb   | GPF  | GPFb | Fmaxb |
| $\mathbf{n}_1$ | 0.1    | 0.2      | 14.2             | 15.5             | 17.5             | 12.4 | 12.4 | 12.5 | 13.2 | 11.5 | 37.0  |
|                |        | 0.4      | 94.8             | 95.4             | 96.4             | 93.6 | 93.9 | 93.8 | 91.6 | 90.2 | 99.4  |
|                |        | 0.6      | 100              | 100              | 100              | 100  | 100  | 100  | 100  | 100  | 100   |
|                |        | 0.8      | 100              | 100              | 100              | 100  | 100  | 100  | 100  | 100  | 100   |
|                |        | 1.0      | 99.9             | 100              | 100              | 99.9 | 99.9 | 99.9 | 100  | 100  | 100   |
|                | 0.5    | 0.2      | 0.2              | 0.2              | 0.6              | 0.2  | 0.2  | 0.2  | 0.2  | 0.2  | 0.0   |
|                |        | 0.4      | 5.5              | 6.3              | 7.6              | 5.1  | 5.4  | 5.1  | 5.5  | 5.0  | 4.2   |
|                |        | 0.6      | 30.1             | 32.5             | 35.9             | 28.7 | 29.6 | 28.8 | 28.6 | 27.0 | 27.8  |
|                |        | 0.8      | 67.1             | 69.3             | 73.8             | 65.4 | 66.1 | 65.5 | 64.7 | 62.5 | 66.7  |
|                |        | 1.0      | 92.2             | 93.3             | 94.2             | 91.1 | 91.7 | 91.3 | 89.0 | 87.7 | 91.6  |
|                | 0.9    | 0.2      | 0.1              | 0.2              | 0.3              | 0.1  | 0.1  | 0.1  | 0.3  | 0.2  | 0.1   |
|                |        | 0.4      | 0.8              | 1.0              | 1.1              | 0.7  | 0.7  | 0.7  | 0.7  | 0.7  | 0.5   |
|                |        | 0.6      | 2.8              | 3.1              | 3.9              | 2.6  | 2.8  | 2.7  | 2.1  | 2.0  | 1.6   |
|                |        | 0.8      | 7.5              | 8.2              | 8.8              | 7.2  | 7.3  | 6.9  | 6.9  | 6.4  | 5.2   |
|                |        | 1.0      | 18.2             | 19.9             | 22.5             | 16.2 | 17.3 | 16.7 | 17.4 | 15.2 | 13.2  |
| $\mathbf{n}_3$ | 0.1    | 0.2      | 34.5             | 35.4             | 37.2             | 33.3 | 33.6 | 33.4 | 32.7 | 31.9 | 69.8  |
|                |        | 0.4      | 99.6             | 99.6             | 99.8             | 99.4 | 99.5 | 99.5 | 99.1 | 98.9 | 100   |
|                |        | 0.6      | 100              | 100              | 100              | 100  | 100  | 100  | 100  | 100  | 100   |
|                |        | 0.8      | 100              | 100              | 100              | 100  | 100  | 100  | 100  | 100  | 100   |
|                |        | 1.0      | 100              | 100              | 100              | 100  | 100  | 100  | 100  | 100  | 100   |
|                | 0.5    | 0.2      | 1.6              | 1.8              | 1.8              | 1.5  | 1.5  | 1.6  | 1.6  | 1.6  | 0.6   |
|                |        | 0.4      | 17.5             | 18.1             | 20.0             | 17.0 | 17.3 | 16.8 | 16.7 | 16.2 | 18.3  |
|                |        | 0.6      | 58.9             | 60.3             | 61.3             | 57.6 | 58.4 | 58.1 | 56.7 | 55.4 | 60.2  |
|                |        | 0.8      | 88.9             | 89.2             | 90.1             | 88.1 | 88.4 | 88.2 | 87.7 | 86.9 | 91.0  |
|                |        | 1.0      | 99.1             | 99.1             | 99.2             | 99.1 | 99.1 | 99.1 | 98.6 | 98.2 | 98.9  |
|                | 0.9    | 0.2      | 0.1              | 0.1              | 0.2              | 0.1  | 0.1  | 0.1  | 0.4  | 0.3  | 0.1   |
|                |        | 0.4      | 0.9              | 1.0              | 1.0              | 0.9  | 0.9  | 0.9  | 1.0  | 1.0  | 0.8   |
|                |        | 0.6      | 5.5              | 5.8              | 6.7              | 5.1  | 5.3  | 5.1  | 5.1  | 4.9  | 3.5   |
|                |        | 0.8      | 19.5             | 20.5             | 22.3             | 18.4 | 19.2 | 18.3 | 18.4 | 17.7 | 13.0  |
|                |        | 1.0      | 40.7             | 42.3             | 44.0             | 39.9 | 40.6 | 39.8 | 40.5 | 39.5 | 33.2  |

Table 39: Comparisonwise power rates (as percentages) of the tests obtained under Model 5 and standard normal distribution ( $M = 80$ ,  $\delta \neq 0$ ,  $\mathbf{n}_1 = (10, 10, 10, 10)$ ,  $\mathbf{n}_3 = (10, 20, 15, 30)$ ,  $nr = 1000$ ,  $nboot = 10,000$  and  $\alpha = 5\%$ ).

| $\mathbf{n}$   | $\rho$ | $\delta$ | Test             |                  |                  |       |       |       |       |       |       |
|----------------|--------|----------|------------------|------------------|------------------|-------|-------|-------|-------|-------|-------|
|                |        |          | L <sup>2</sup> N | L <sup>2</sup> B | L <sup>2</sup> b | FN    | FB    | Fb    | GPF   | GPFb  | Fmaxb |
| $\mathbf{n}_1$ | 0.1    | 0.2      | 30.28            | 31.58            | 33.45            | 28.4  | 28.55 | 28.45 | 28.95 | 27.57 | 45.30 |
|                |        | 0.4      | 65.70            | 65.82            | 66.00            | 65.38 | 65.47 | 65.43 | 64.98 | 64.70 | 66.57 |
|                |        | 0.6      | 66.67            | 66.67            | 66.67            | 66.67 | 66.67 | 66.67 | 66.67 | 66.67 | 66.67 |
|                |        | 0.8      | 66.67            | 66.67            | 66.67            | 66.67 | 66.67 | 66.67 | 66.67 | 66.67 | 66.67 |
|                |        | 1.0      | 66.65            | 66.67            | 66.67            | 66.65 | 66.65 | 66.65 | 66.67 | 66.67 | 66.67 |
|                | 0.5    | 0.2      | 7.68             | 8.30             | 9.55             | 7.18  | 7.43  | 7.22  | 8.00  | 7.10  | 6.83  |
|                |        | 0.4      | 21.53            | 23.08            | 24.88            | 20.35 | 20.98 | 20.67 | 21.67 | 20.55 | 20.62 |
|                |        | 0.6      | 42.20            | 43.47            | 45.42            | 40.85 | 41.5  | 41.07 | 41.15 | 39.82 | 41.07 |
|                |        | 0.8      | 58.37            | 59.02            | 60.40            | 57.77 | 58.05 | 57.88 | 57.4  | 56.43 | 57.95 |
|                |        | 1.0      | 65.08            | 65.33            | 65.53            | 64.8  | 64.93 | 64.85 | 64.35 | 64.00 | 64.83 |
|                | 0.9    | 0.2      | 4.65             | 5.20             | 6.20             | 4.10  | 4.50  | 4.28  | 4.92  | 4.27  | 4.10  |
|                |        | 0.4      | 7.93             | 9.00             | 10.08            | 7.32  | 7.72  | 7.40  | 8.43  | 7.63  | 7.48  |
|                |        | 0.6      | 13.78            | 15.02            | 16.47            | 12.83 | 13.35 | 13.08 | 13.87 | 12.78 | 12.57 |
|                |        | 0.8      | 21.98            | 23.38            | 25.08            | 20.82 | 21.22 | 20.85 | 22.13 | 20.50 | 20.25 |
|                |        | 1.0      | 33.08            | 34.58            | 36.73            | 31.47 | 32.32 | 31.77 | 33.37 | 31.42 | 29.53 |
| $\mathbf{n}_3$ | 0.1    | 0.2      | 45.25            | 45.93            | 46.57            | 44.52 | 44.62 | 44.62 | 44.32 | 43.83 | 59.50 |
|                |        | 0.4      | 66.60            | 66.60            | 66.63            | 66.57 | 66.58 | 66.58 | 66.52 | 66.48 | 66.67 |
|                |        | 0.6      | 66.67            | 66.67            | 66.67            | 66.67 | 66.67 | 66.67 | 66.67 | 66.67 | 66.67 |
|                |        | 0.8      | 66.67            | 66.67            | 66.67            | 66.67 | 66.67 | 66.67 | 66.67 | 66.67 | 66.67 |
|                |        | 1.0      | 66.67            | 66.67            | 66.67            | 66.67 | 66.67 | 66.67 | 66.67 | 66.67 | 66.67 |
|                | 0.5    | 0.2      | 11.05            | 11.52            | 12.38            | 10.58 | 10.87 | 10.73 | 11.55 | 10.95 | 10.35 |
|                |        | 0.4      | 34.00            | 34.58            | 36.00            | 33.35 | 33.7  | 33.58 | 33.93 | 33.33 | 35.10 |
|                |        | 0.6      | 55.60            | 55.97            | 56.30            | 55.12 | 55.35 | 55.25 | 54.85 | 54.43 | 56.30 |
|                |        | 0.8      | 64.45            | 64.52            | 64.70            | 64.25 | 64.35 | 64.27 | 64.12 | 63.90 | 64.80 |
|                |        | 1.0      | 66.50            | 66.50            | 66.52            | 66.50 | 66.50 | 66.50 | 66.42 | 66.35 | 66.45 |
|                | 0.9    | 0.2      | 5.07             | 5.43             | 5.92             | 4.93  | 5.10  | 4.97  | 5.35  | 5.02  | 4.98  |
|                |        | 0.4      | 10.85            | 11.28            | 12.05            | 10.40 | 10.83 | 10.53 | 11.10 | 10.42 | 9.42  |
|                |        | 0.6      | 21.27            | 22.08            | 23.00            | 20.72 | 21.20 | 20.75 | 21.70 | 20.85 | 19.22 |
|                |        | 0.8      | 34.95            | 35.87            | 36.98            | 34.18 | 34.82 | 34.35 | 35.03 | 34.33 | 31.77 |
|                |        | 1.0      | 47.85            | 48.53            | 49.38            | 47.37 | 47.78 | 47.40 | 47.97 | 47.28 | 44.83 |

Table 40: The ACD power rates (as percentages) of the tests obtained under Model 5 and standard normal distribution ( $M = 80$ ,  $\delta \neq 0$ ,  $\mathbf{n}_1 = (10, 10, 10, 10)$ ,  $\mathbf{n}_3 = (10, 20, 15, 30)$ ,  $nr = 1000$ ,  $nboot = 10,000$  and  $\alpha = 5\%$ ).

| $\mathbf{n}$   | $\rho$ | $\delta$ | Test             |                  |                  |      |      |      |      |      |       |
|----------------|--------|----------|------------------|------------------|------------------|------|------|------|------|------|-------|
|                |        |          | L <sup>2</sup> N | L <sup>2</sup> B | L <sup>2</sup> b | FN   | FB   | Fb   | GPF  | GPFb | Fmaxb |
| $\mathbf{n}_1$ | 0.1    | 0.2      | 14.0             | 15.2             | 17.2             | 12.3 | 15.2 | 12.3 | 13.0 | 11.3 | 35.9  |
|                |        | 0.4      | 85.9             | 85.7             | 85.1             | 86.4 | 87.2 | 86.7 | 83.3 | 83.1 | 90.5  |
|                |        | 0.6      | 90.0             | 89.0             | 87.1             | 91.4 | 91.3 | 91.3 | 89.8 | 91.0 | 91.3  |
|                |        | 0.8      | 90.0             | 89.0             | 87.7             | 91.2 | 90.9 | 91.1 | 90.0 | 91.2 | 90.9  |
|                |        | 1.0      | 89.7             | 89.1             | 87.8             | 90.5 | 90.5 | 90.5 | 89.9 | 90.5 | 91.3  |
|                | 0.5    | 0.2      | 0.2              | 0.2              | 0.6              | 0.2  | 0.6  | 0.2  | 0.2  | 0.2  | 0.0   |
|                |        | 0.4      | 5.5              | 6.2              | 7.4              | 5.1  | 7.9  | 5.1  | 5.5  | 5.0  | 4.2   |
|                |        | 0.6      | 28.5             | 30.3             | 33.3             | 27.1 | 31.4 | 27.2 | 26.5 | 25.2 | 26.2  |
|                |        | 0.8      | 62.2             | 63.5             | 66.9             | 61.6 | 66.1 | 61.2 | 59.6 | 58.1 | 61.9  |
|                |        | 1.0      | 84.1             | 84.2             | 83.0             | 84.1 | 85.2 | 84.4 | 80.3 | 80.4 | 83.3  |
|                | 0.9    | 0.2      | 0.1              | 0.2              | 0.3              | 0.1  | 0.1  | 0.1  | 0.3  | 0.2  | 0.1   |
|                |        | 0.4      | 0.8              | 1.0              | 1.1              | 0.7  | 1.0  | 0.7  | 0.7  | 0.7  | 0.5   |
|                |        | 0.6      | 2.7              | 3.0              | 3.6              | 2.5  | 3.7  | 2.6  | 2.1  | 2.0  | 1.6   |
|                |        | 0.8      | 7.0              | 7.6              | 8.1              | 6.8  | 9.6  | 6.6  | 6.5  | 6.0  | 4.9   |
|                |        | 1.0      | 17.2             | 18.7             | 20.5             | 15.3 | 20.2 | 15.8 | 15.6 | 14.2 | 12.3  |
| $\mathbf{n}_3$ | 0.1    | 0.2      | 32.7             | 33.4             | 35.1             | 31.8 | 40.0 | 32.0 | 31.1 | 30.6 | 65.0  |
|                |        | 0.4      | 89.2             | 88.0             | 87.0             | 89.3 | 89.4 | 89.5 | 88.1 | 89.0 | 89.1  |
|                |        | 0.6      | 88.5             | 87.8             | 86.8             | 88.6 | 88.6 | 89.2 | 88.4 | 88.8 | 88.8  |
|                |        | 0.8      | 88.0             | 87.9             | 87.0             | 88.6 | 88.6 | 88.5 | 88.7 | 88.8 | 88.9  |
|                |        | 1.0      | 88.3             | 88.0             | 87.7             | 88.7 | 88.7 | 88.7 | 88.8 | 89.1 | 89.3  |
|                | 0.5    | 0.2      | 1.6              | 1.8              | 1.8              | 1.5  | 1.7  | 1.6  | 1.5  | 1.5  | 0.6   |
|                |        | 0.4      | 16.7             | 17.3             | 19.1             | 16.4 | 21.8 | 16.2 | 15.9 | 15.4 | 17.4  |
|                |        | 0.6      | 54.7             | 55.7             | 56.2             | 53.7 | 62.5 | 54.1 | 52.6 | 51.6 | 56.2  |
|                |        | 0.8      | 80.2             | 80.1             | 80.5             | 80.0 | 84.8 | 79.9 | 79.1 | 78.7 | 83.4  |
|                |        | 1.0      | 89.0             | 88.4             | 87.9             | 89.4 | 89.7 | 89.0 | 88.1 | 88.3 | 90.1  |
|                | 0.9    | 0.2      | 0.1              | 0.1              | 0.2              | 0.1  | 0.2  | 0.1  | 0.4  | 0.3  | 0.1   |
|                |        | 0.4      | 0.9              | 1.0              | 1.0              | 0.9  | 1.2  | 0.9  | 1.0  | 1.0  | 0.7   |
|                |        | 0.6      | 5.2              | 5.5              | 6.3              | 4.9  | 7.0  | 4.9  | 4.9  | 4.7  | 3.1   |
|                |        | 0.8      | 18.4             | 19.4             | 21.0             | 17.4 | 23.0 | 17.3 | 17.1 | 16.3 | 11.7  |
|                |        | 1.0      | 37.9             | 39.4             | 40.7             | 37.3 | 45.6 | 37.2 | 38.1 | 37.2 | 30.4  |

Table 41: Experimentwise (E) and comparisonwise (C) error rates (as percentages) of the tests obtained under Model 6 and standard normal distribution ( $M = 80$ ,  $\sigma^2 = 1.5\rho/2$ ,  $\mathbf{n}_1 = (10, 10, 10, 10)$ ,  $\mathbf{n}_3 = (10, 20, 15, 30)$ ,  $nr = 1000$ ,  $nboot = 10,000$  and  $\alpha = 5\%$ ). For  $\delta = 0.4, 0.6, 0.8, 1$ , the results were very similar, and, therefore, they are omitted.

| Error<br>rate | $\mathbf{n}$   | $\rho$ | $\delta$ | Test             |                  |                  |      |      |      |      |      |       |
|---------------|----------------|--------|----------|------------------|------------------|------------------|------|------|------|------|------|-------|
|               |                |        |          | L <sup>2</sup> N | L <sup>2</sup> B | L <sup>2</sup> b | FN   | FB   | Fb   | GPF  | GPFb | Fmaxb |
| E             | $\mathbf{n}_1$ | 0.1    | 0.0      | 22.4             | 23.5             | 25.1             | 19.6 | 19.6 | 19.8 | 21.6 | 19.5 | 19.9  |
|               |                |        | 0.2      | 12.5             | 13.4             | 14.4             | 11.1 | 11.1 | 11.4 | 12.6 | 11.3 | 10.4  |
|               |                | 0.5    | 0.0      | 19.5             | 21.8             | 25.7             | 17.8 | 18.6 | 18.0 | 20.8 | 19.2 | 18.3  |
|               |                |        | 0.2      | 11.7             | 13.4             | 15.0             | 10.1 | 11.1 | 10.9 | 12.1 | 10.6 | 10.1  |
|               |                | 0.9    | 0.0      | 22.3             | 24.7             | 27.5             | 19.9 | 21.4 | 20.9 | 22.7 | 19.7 | 20.3  |
|               |                |        | 0.2      | 9.8              | 11.4             | 13.1             | 8.7  | 9.4  | 9.1  | 9.9  | 8.8  | 8.7   |
|               | $\mathbf{n}_3$ | 0.1    | 0.0      | 19.2             | 19.8             | 20.9             | 18.0 | 18.0 | 18.1 | 19.0 | 17.9 | 18.1  |
|               |                |        | 0.2      | 9.1              | 9.8              | 11.0             | 8.5  | 8.8  | 8.5  | 9.2  | 8.7  | 8.7   |
|               |                | 0.5    | 0.0      | 17.5             | 18.8             | 20.8             | 16.7 | 17.1 | 16.7 | 18.4 | 18.0 | 21.6  |
|               |                |        | 0.2      | 8.7              | 9.3              | 10.2             | 8.1  | 8.4  | 8.3  | 9.0  | 8.1  | 9.7   |
|               |                | 0.9    | 0.0      | 21.3             | 22.2             | 22.9             | 19.7 | 20.8 | 20.5 | 22.0 | 19.9 | 23.3  |
|               |                |        | 0.2      | 9.5              | 10.0             | 11.0             | 9.2  | 9.5  | 9.2  | 11.4 | 10.7 | 11.5  |
| C             | $\mathbf{n}_1$ | 0.1    | 0.0      | 5.85             | 6.23             | 6.95             | 4.98 | 5.00 | 5.03 | 5.65 | 4.93 | 5.07  |
|               |                |        | 0.2      | 2.13             | 2.30             | 2.50             | 1.90 | 1.90 | 1.95 | 2.17 | 1.93 | 1.78  |
|               |                | 0.5    | 0.0      | 4.68             | 5.47             | 6.62             | 4.18 | 4.45 | 4.27 | 5.07 | 4.53 | 4.47  |
|               |                |        | 0.2      | 1.98             | 2.30             | 2.60             | 1.72 | 1.88 | 1.85 | 2.08 | 1.82 | 1.73  |
|               |                | 0.9    | 0.0      | 5.35             | 6.07             | 7.08             | 4.60 | 4.95 | 4.85 | 5.52 | 4.75 | 4.85  |
|               |                |        | 0.2      | 1.65             | 1.92             | 2.20             | 1.47 | 1.58 | 1.53 | 1.68 | 1.50 | 1.50  |
|               | $\mathbf{n}_3$ | 0.1    | 0.0      | 5.02             | 5.28             | 5.57             | 4.65 | 4.65 | 4.72 | 4.97 | 4.65 | 4.58  |
|               |                |        | 0.2      | 1.53             | 1.65             | 1.87             | 1.43 | 1.48 | 1.43 | 1.55 | 1.47 | 1.47  |
|               |                | 0.5    | 0.0      | 4.72             | 5.07             | 5.57             | 4.50 | 4.60 | 4.47 | 4.93 | 4.77 | 5.23  |
|               |                |        | 0.2      | 1.48             | 1.58             | 1.73             | 1.38 | 1.43 | 1.42 | 1.53 | 1.38 | 1.67  |
|               |                | 0.9    | 0.0      | 5.05             | 5.43             | 5.90             | 4.72 | 4.98 | 4.82 | 5.43 | 4.93 | 5.65  |
|               |                |        | 0.2      | 1.60             | 1.70             | 1.87             | 1.55 | 1.60 | 1.55 | 1.92 | 1.78 | 1.93  |

Table 42: Experimentwise power rates (as percentages) of the tests obtained under Model 6 and standard normal distribution ( $M = 80$ ,  $\sigma^2 = 1.5\rho/2$ ,  $\delta \neq 0$ ,  $\mathbf{n}_1 = (10, 10, 10, 10)$ ,  $\mathbf{n}_3 = (10, 20, 15, 30)$ ,  $nr = 1000$ ,  $nboot = 10,000$  and  $\alpha = 5\%$ ).

| n              | $\rho$ | $\delta$ | Test             |                  |                  |      |      |      |      |      |       |
|----------------|--------|----------|------------------|------------------|------------------|------|------|------|------|------|-------|
|                |        |          | L <sup>2</sup> N | L <sup>2</sup> B | L <sup>2</sup> b | FN   | FB   | Fb   | GPF  | GPFb | Fmaxb |
| n <sub>1</sub> | 0.1    | 0.2      | 9.6              | 11.3             | 12.6             | 8.2  | 8.2  | 8.2  | 8.5  | 7.5  | 16.0  |
|                |        | 0.4      | 83.8             | 84.9             | 86.6             | 82.0 | 82.4 | 82.4 | 78.1 | 76.9 | 93.2  |
|                |        | 0.6      | 99.9             | 99.9             | 99.9             | 99.8 | 99.8 | 99.8 | 99.5 | 99.4 | 99.9  |
|                |        | 0.8      | 100              | 100              | 100              | 100  | 100  | 100  | 100  | 100  | 100   |
|                |        | 1.0      | 100              | 100              | 100              | 100  | 100  | 100  | 100  | 100  | 100   |
|                | 0.5    | 0.2      | 0.5              | 0.5              | 0.7              | 0.4  | 0.4  | 0.4  | 0.6  | 0.4  | 0.1   |
|                |        | 0.4      | 5.3              | 5.7              | 6.8              | 4.5  | 5.0  | 4.6  | 5.2  | 4.5  | 4.0   |
|                |        | 0.6      | 24.1             | 26.6             | 29.1             | 21.9 | 22.6 | 22.1 | 22.1 | 20.0 | 20.8  |
|                |        | 0.8      | 61.5             | 63.7             | 67.5             | 59.0 | 60.2 | 59.8 | 57.1 | 54.4 | 57.0  |
|                |        | 1.0      | 87.1             | 88.5             | 90.3             | 86.2 | 86.8 | 86.3 | 83.2 | 81.8 | 85.3  |
|                | 0.9    | 0.2      | 0.0              | 0.1              | 0.2              | 0.0  | 0.0  | 0.0  | 0.1  | 0.1  | 0.0   |
|                |        | 0.4      | 0.6              | 0.7              | 0.7              | 0.5  | 0.5  | 0.5  | 0.6  | 0.6  | 0.2   |
|                |        | 0.6      | 1.7              | 2.0              | 2.9              | 1.5  | 1.7  | 1.5  | 1.8  | 1.5  | 1.2   |
|                |        | 0.8      | 6.6              | 7.5              | 9.3              | 5.6  | 5.9  | 5.7  | 6.4  | 5.7  | 4.8   |
|                |        | 1.0      | 15.7             | 17.0             | 19.4             | 14.6 | 15.1 | 14.6 | 15.2 | 13.8 | 11.5  |
| n <sub>3</sub> | 0.1    | 0.2      | 24.6             | 25.2             | 26.4             | 24.0 | 24.0 | 24.0 | 22.7 | 21.8 | 37.2  |
|                |        | 0.4      | 97.1             | 97.1             | 97.2             | 96.5 | 96.5 | 96.9 | 94.7 | 94.5 | 99.6  |
|                |        | 0.6      | 100              | 100              | 100              | 100  | 100  | 100  | 100  | 100  | 100   |
|                |        | 0.8      | 100              | 100              | 100              | 100  | 100  | 100  | 100  | 100  | 100   |
|                |        | 1.0      | 100              | 100              | 100              | 100  | 100  | 100  | 100  | 100  | 100   |
|                | 0.5    | 0.2      | 1.5              | 1.5              | 1.7              | 1.5  | 1.5  | 1.4  | 1.3  | 1.3  | 1.1   |
|                |        | 0.4      | 13.2             | 13.8             | 15.5             | 12.5 | 12.8 | 12.7 | 12.1 | 11.8 | 11.7  |
|                |        | 0.6      | 51.0             | 51.9             | 54.8             | 49.6 | 50.4 | 50.2 | 49.0 | 47.5 | 52.8  |
|                |        | 0.8      | 87.0             | 87.6             | 88.6             | 86.3 | 86.4 | 86.4 | 84.6 | 83.5 | 86.5  |
|                |        | 1.0      | 97.9             | 98.0             | 98.2             | 97.8 | 97.8 | 97.9 | 96.6 | 96.5 | 98.1  |
|                | 0.9    | 0.2      | 0.1              | 0.1              | 0.1              | 0.1  | 0.1  | 0.1  | 0.0  | 0.0  | 0.0   |
|                |        | 0.4      | 1.2              | 1.3              | 1.5              | 1.1  | 1.1  | 1.2  | 1.1  | 1.1  | 1.0   |
|                |        | 0.6      | 5.7              | 6.6              | 7.0              | 5.3  | 5.6  | 5.3  | 5.0  | 4.6  | 4.0   |
|                |        | 0.8      | 16.8             | 17.7             | 19.0             | 16.2 | 16.4 | 16.4 | 16.3 | 15.6 | 12.7  |
|                |        | 1.0      | 37.0             | 38.2             | 39.9             | 35.8 | 36.6 | 36.1 | 35.2 | 33.5 | 30.2  |

Table 43: Comparisonwise power rates (as percentages) of the tests obtained under Model 6 and standard normal distribution ( $M = 80$ ,  $\sigma^2 = 1.5\rho/2$ ,  $\delta \neq 0$ ,  $\mathbf{n}_1 = (10, 10, 10, 10)$ ,  $\mathbf{n}_3 = (10, 20, 15, 30)$ ,  $nr = 1000$ ,  $nboot = 10,000$  and  $\alpha = 5\%$ ).

| $\mathbf{n}$   | $\rho$ | $\delta$ | Test             |                  |                  |       |       |       |       |       |       |
|----------------|--------|----------|------------------|------------------|------------------|-------|-------|-------|-------|-------|-------|
|                |        |          | L <sup>2</sup> N | L <sup>2</sup> B | L <sup>2</sup> b | FN    | FB    | Fb    | GPF   | GPFb  | Fmaxb |
| $\mathbf{n}_1$ | 0.1    | 0.2      | 25.85            | 26.93            | 28.50            | 24.25 | 24.33 | 24.35 | 24.75 | 23.40 | 31.20 |
|                |        | 0.4      | 63.12            | 63.47            | 63.82            | 62.53 | 62.62 | 62.62 | 61.42 | 61.05 | 65.27 |
|                |        | 0.6      | 66.65            | 66.65            | 66.65            | 66.63 | 66.63 | 66.63 | 66.58 | 66.55 | 66.65 |
|                |        | 0.8      | 66.67            | 66.67            | 66.67            | 66.67 | 66.67 | 66.67 | 66.67 | 66.67 | 66.67 |
|                |        | 1.0      | 66.67            | 66.67            | 66.67            | 66.67 | 66.67 | 66.67 | 66.67 | 66.67 | 66.67 |
|                | 0.5    | 0.2      | 7.27             | 7.93             | 8.80             | 6.68  | 6.95  | 6.75  | 7.73  | 6.87  | 6.67  |
|                |        | 0.4      | 20.05            | 21.00            | 22.82            | 18.55 | 19.23 | 18.80 | 19.73 | 18.28 | 18.57 |
|                |        | 0.6      | 39.38            | 40.62            | 42.52            | 38.02 | 38.57 | 38.33 | 38.25 | 36.80 | 37.87 |
|                |        | 0.8      | 56.20            | 56.88            | 58.17            | 55.22 | 55.63 | 55.42 | 54.60 | 53.45 | 54.90 |
|                |        | 1.0      | 63.90            | 64.27            | 64.65            | 63.55 | 63.68 | 63.57 | 62.75 | 62.37 | 63.35 |
|                | 0.9    | 0.2      | 4.73             | 5.25             | 6.02             | 4.15  | 4.53  | 4.25  | 5.05  | 4.63  | 4.47  |
|                |        | 0.4      | 7.62             | 8.30             | 9.32             | 7.08  | 7.37  | 7.22  | 8.32  | 7.47  | 7.20  |
|                |        | 0.6      | 13.47            | 14.50            | 16.17            | 12.57 | 13.10 | 12.75 | 14.10 | 13.05 | 12.10 |
|                |        | 0.8      | 22.02            | 23.37            | 25.15            | 20.63 | 21.30 | 20.88 | 22.22 | 20.60 | 19.47 |
|                |        | 1.0      | 32.35            | 33.78            | 35.50            | 31.02 | 31.78 | 31.25 | 32.32 | 30.57 | 28.70 |
| $\mathbf{n}_3$ | 0.1    | 0.2      | 38.95            | 39.42            | 40.33            | 38.22 | 38.28 | 38.17 | 37.77 | 37.15 | 47.23 |
|                |        | 0.4      | 66.07            | 66.07            | 66.12            | 65.93 | 65.93 | 66.00 | 65.62 | 65.55 | 66.60 |
|                |        | 0.6      | 66.67            | 66.67            | 66.67            | 66.67 | 66.67 | 66.67 | 66.67 | 66.67 | 66.67 |
|                |        | 0.8      | 66.67            | 66.67            | 66.67            | 66.67 | 66.67 | 66.67 | 66.67 | 66.67 | 66.67 |
|                |        | 1.0      | 66.67            | 66.67            | 66.67            | 66.67 | 66.67 | 66.67 | 66.67 | 66.67 | 66.67 |
|                | 0.5    | 0.2      | 9.95             | 10.33            | 11.10            | 9.47  | 9.75  | 9.60  | 10.08 | 9.63  | 10.02 |
|                |        | 0.4      | 30.75            | 31.43            | 32.52            | 30.15 | 30.48 | 30.40 | 30.18 | 29.60 | 30.85 |
|                |        | 0.6      | 52.63            | 53.07            | 54.00            | 52.27 | 52.45 | 52.43 | 51.98 | 51.50 | 53.72 |
|                |        | 0.8      | 63.72            | 63.93            | 64.18            | 63.52 | 63.57 | 63.58 | 63.12 | 62.83 | 63.78 |
|                |        | 1.0      | 66.27            | 66.28            | 66.32            | 66.25 | 66.25 | 66.27 | 66.02 | 66.00 | 66.32 |
|                | 0.9    | 0.2      | 5.00             | 5.40             | 5.92             | 4.73  | 4.92  | 4.77  | 5.30  | 5.07  | 4.92  |
|                |        | 0.4      | 10.62            | 11.10            | 11.85            | 10.27 | 10.47 | 10.32 | 10.70 | 10.27 | 9.83  |
|                |        | 0.6      | 20.47            | 21.33            | 22.42            | 20.02 | 20.40 | 20.12 | 20.63 | 19.83 | 19.13 |
|                |        | 0.8      | 33.15            | 34.07            | 35.23            | 32.67 | 33.07 | 32.78 | 33.40 | 32.70 | 30.82 |
|                |        | 1.0      | 46.32            | 46.90            | 47.83            | 45.88 | 46.25 | 45.92 | 45.82 | 45.08 | 43.22 |

Table 44: The ACD power rates (as percentages) of the tests obtained under Model 6 and standard normal distribution ( $M = 80$ ,  $\sigma^2 = 1.5\rho/2$ ,  $\delta \neq 0$ ,  $\mathbf{n}_1 = (10, 10, 10, 10)$ ,  $\mathbf{n}_3 = (10, 20, 15, 30)$ ,  $nr = 1000$ ,  $nboot = 10,000$  and  $\alpha = 5\%$ ).

| n              | $\rho$         | $\delta$ | Test             |                  |                  |      |      |      |      |      |       |      |
|----------------|----------------|----------|------------------|------------------|------------------|------|------|------|------|------|-------|------|
|                |                |          | L <sup>2</sup> N | L <sup>2</sup> B | L <sup>2</sup> b | FN   | FB   | Fb   | GPF  | GPFb | Fmaxb |      |
| n <sub>1</sub> | 0.1            | 0.2      | 9.4              | 11.0             | 12.3             | 8.1  | 11.1 | 8.1  | 8.3  | 7.3  | 15.4  |      |
|                |                | 0.4      | 75.8             | 76.0             | 76.5             | 75.4 | 77.9 | 75.7 | 71.3 | 70.8 | 84.1  |      |
|                |                | 0.6      | 88.3             | 87.2             | 86.0             | 89.5 | 89.6 | 89.4 | 88.3 | 88.8 | 88.6  |      |
|                |                | 0.8      | 88.0             | 86.9             | 85.1             | 89.4 | 89.0 | 89.2 | 88.4 | 89.1 | 88.7  |      |
|                |                | 1.0      | 87.8             | 87.0             | 85.1             | 89.0 | 88.7 | 88.8 | 88.5 | 89.1 | 88.8  |      |
|                | 0.5            | 0.2      | 0.5              | 0.5              | 0.7              | 0.4  | 0.5  | 0.4  | 0.6  | 0.4  | 0.1   |      |
|                |                | 0.4      | 5.1              | 5.5              | 6.2              | 4.3  | 6.8  | 4.4  | 4.9  | 4.3  | 3.5   |      |
|                |                | 0.6      | 22.7             | 24.6             | 26.6             | 20.9 | 26.6 | 21.1 | 20.5 | 18.8 | 19.7  |      |
|                |                | 0.8      | 57.0             | 58.1             | 60.2             | 54.9 | 60.0 | 55.7 | 52.5 | 50.5 | 52.2  |      |
|                |                | 1.0      | 78.1             | 78.4             | 78.3             | 78.1 | 79.9 | 77.9 | 74.6 | 75.0 | 78.4  |      |
|                | 0.9            | 0.2      | 0.0              | 0.1              | 0.2              | 0.0  | 0.0  | 0.0  | 0.1  | 0.1  | 0.0   |      |
|                |                | 0.4      | 0.6              | 0.7              | 0.6              | 0.5  | 0.6  | 0.5  | 0.6  | 0.6  | 0.2   |      |
|                |                | 0.6      | 1.7              | 2.0              | 2.9              | 1.5  | 2.7  | 1.5  | 1.7  | 1.4  | 1.1   |      |
|                |                | 0.8      | 6.3              | 7.2              | 8.7              | 5.4  | 7.6  | 5.5  | 6.2  | 5.5  | 4.7   |      |
|                |                | 1.0      | 14.7             | 15.8             | 17.5             | 14.1 | 17.6 | 14.1 | 14.1 | 13.0 | 10.6  |      |
|                | n <sub>3</sub> | 0.1      | 0.2              | 23.5             | 24.0             | 25.1 | 22.9 | 28.4 | 22.9 | 21.7 | 20.8  | 35.6 |
|                |                |          | 0.4              | 88.7             | 88.3             | 88.0 | 89.1 | 90.3 | 89.1 | 87.3 | 87.5  | 91.1 |
|                |                |          | 0.6              | 90.2             | 89.7             | 89.2 | 90.9 | 90.7 | 90.5 | 90.6 | 90.8  | 91.1 |
|                |                |          | 0.8              | 91.2             | 90.6             | 90.1 | 91.5 | 91.4 | 91.3 | 91.0 | 91.1  | 91.3 |
|                |                |          | 1.0              | 91.4             | 90.8             | 90.3 | 91.8 | 91.8 | 91.8 | 91.2 | 91.8  | 91.4 |
| 0.5            |                | 0.2      | 1.4              | 1.4              | 1.6              | 1.4  | 1.5  | 1.4  | 1.3  | 1.3  | 1.0   |      |
|                |                | 0.4      | 12.6             | 13.1             | 14.8             | 11.9 | 15.8 | 12.1 | 11.6 | 11.3 | 11.0  |      |
|                |                | 0.6      | 48.5             | 49.3             | 51.6             | 47.2 | 55.9 | 47.9 | 46.5 | 45.2 | 49.3  |      |
|                |                | 0.8      | 80.7             | 81.0             | 81.2             | 80.4 | 86.1 | 80.7 | 78.5 | 77.6 | 79.3  |      |
|                |                | 1.0      | 89.9             | 89.5             | 88.8             | 90.3 | 91.0 | 90.3 | 89.3 | 89.6 | 89.3  |      |
| 0.9            |                | 0.2      | 0.1              | 0.1              | 0.1              | 0.1  | 0.2  | 0.1  | 0.0  | 0.0  | 0.0   |      |
|                |                | 0.4      | 1.1              | 1.2              | 1.4              | 1.0  | 1.2  | 1.1  | 1.0  | 1.0  | 1.0   |      |
|                |                | 0.6      | 5.2              | 6.1              | 6.2              | 4.9  | 6.4  | 4.9  | 4.5  | 4.2  | 3.8   |      |
|                |                | 0.8      | 15.9             | 16.7             | 17.9             | 15.4 | 19.8 | 15.7 | 15.2 | 14.7 | 11.8  |      |
|                |                | 1.0      | 34.4             | 35.5             | 36.7             | 33.7 | 41.1 | 33.9 | 32.7 | 31.2 | 27.4  |      |
